# Supplementary material for: Vitex rotundifolia L. f. Engineered Microbial Interaction Reverse Desertification: Nitrogen-Fixing Consortia Drive Ecosystem Restoration in Sandy Wetlands of Poyang Lake
Source: Research Square preprint supplement (doi:10.21203/rs.3.rs-7181804/v1), 2025-10-07
Supplement: Supplementary file 1 [file 989d70dba58e7ed12c3021da.docx]

***Vitex rotundifolia* L. f. Engineered Microbial Interaction Reverse Desertification: Nitrogen-Fixing Consortia Drive Ecosystem Restoration in Sandy Wetlands of Poyang Lake**


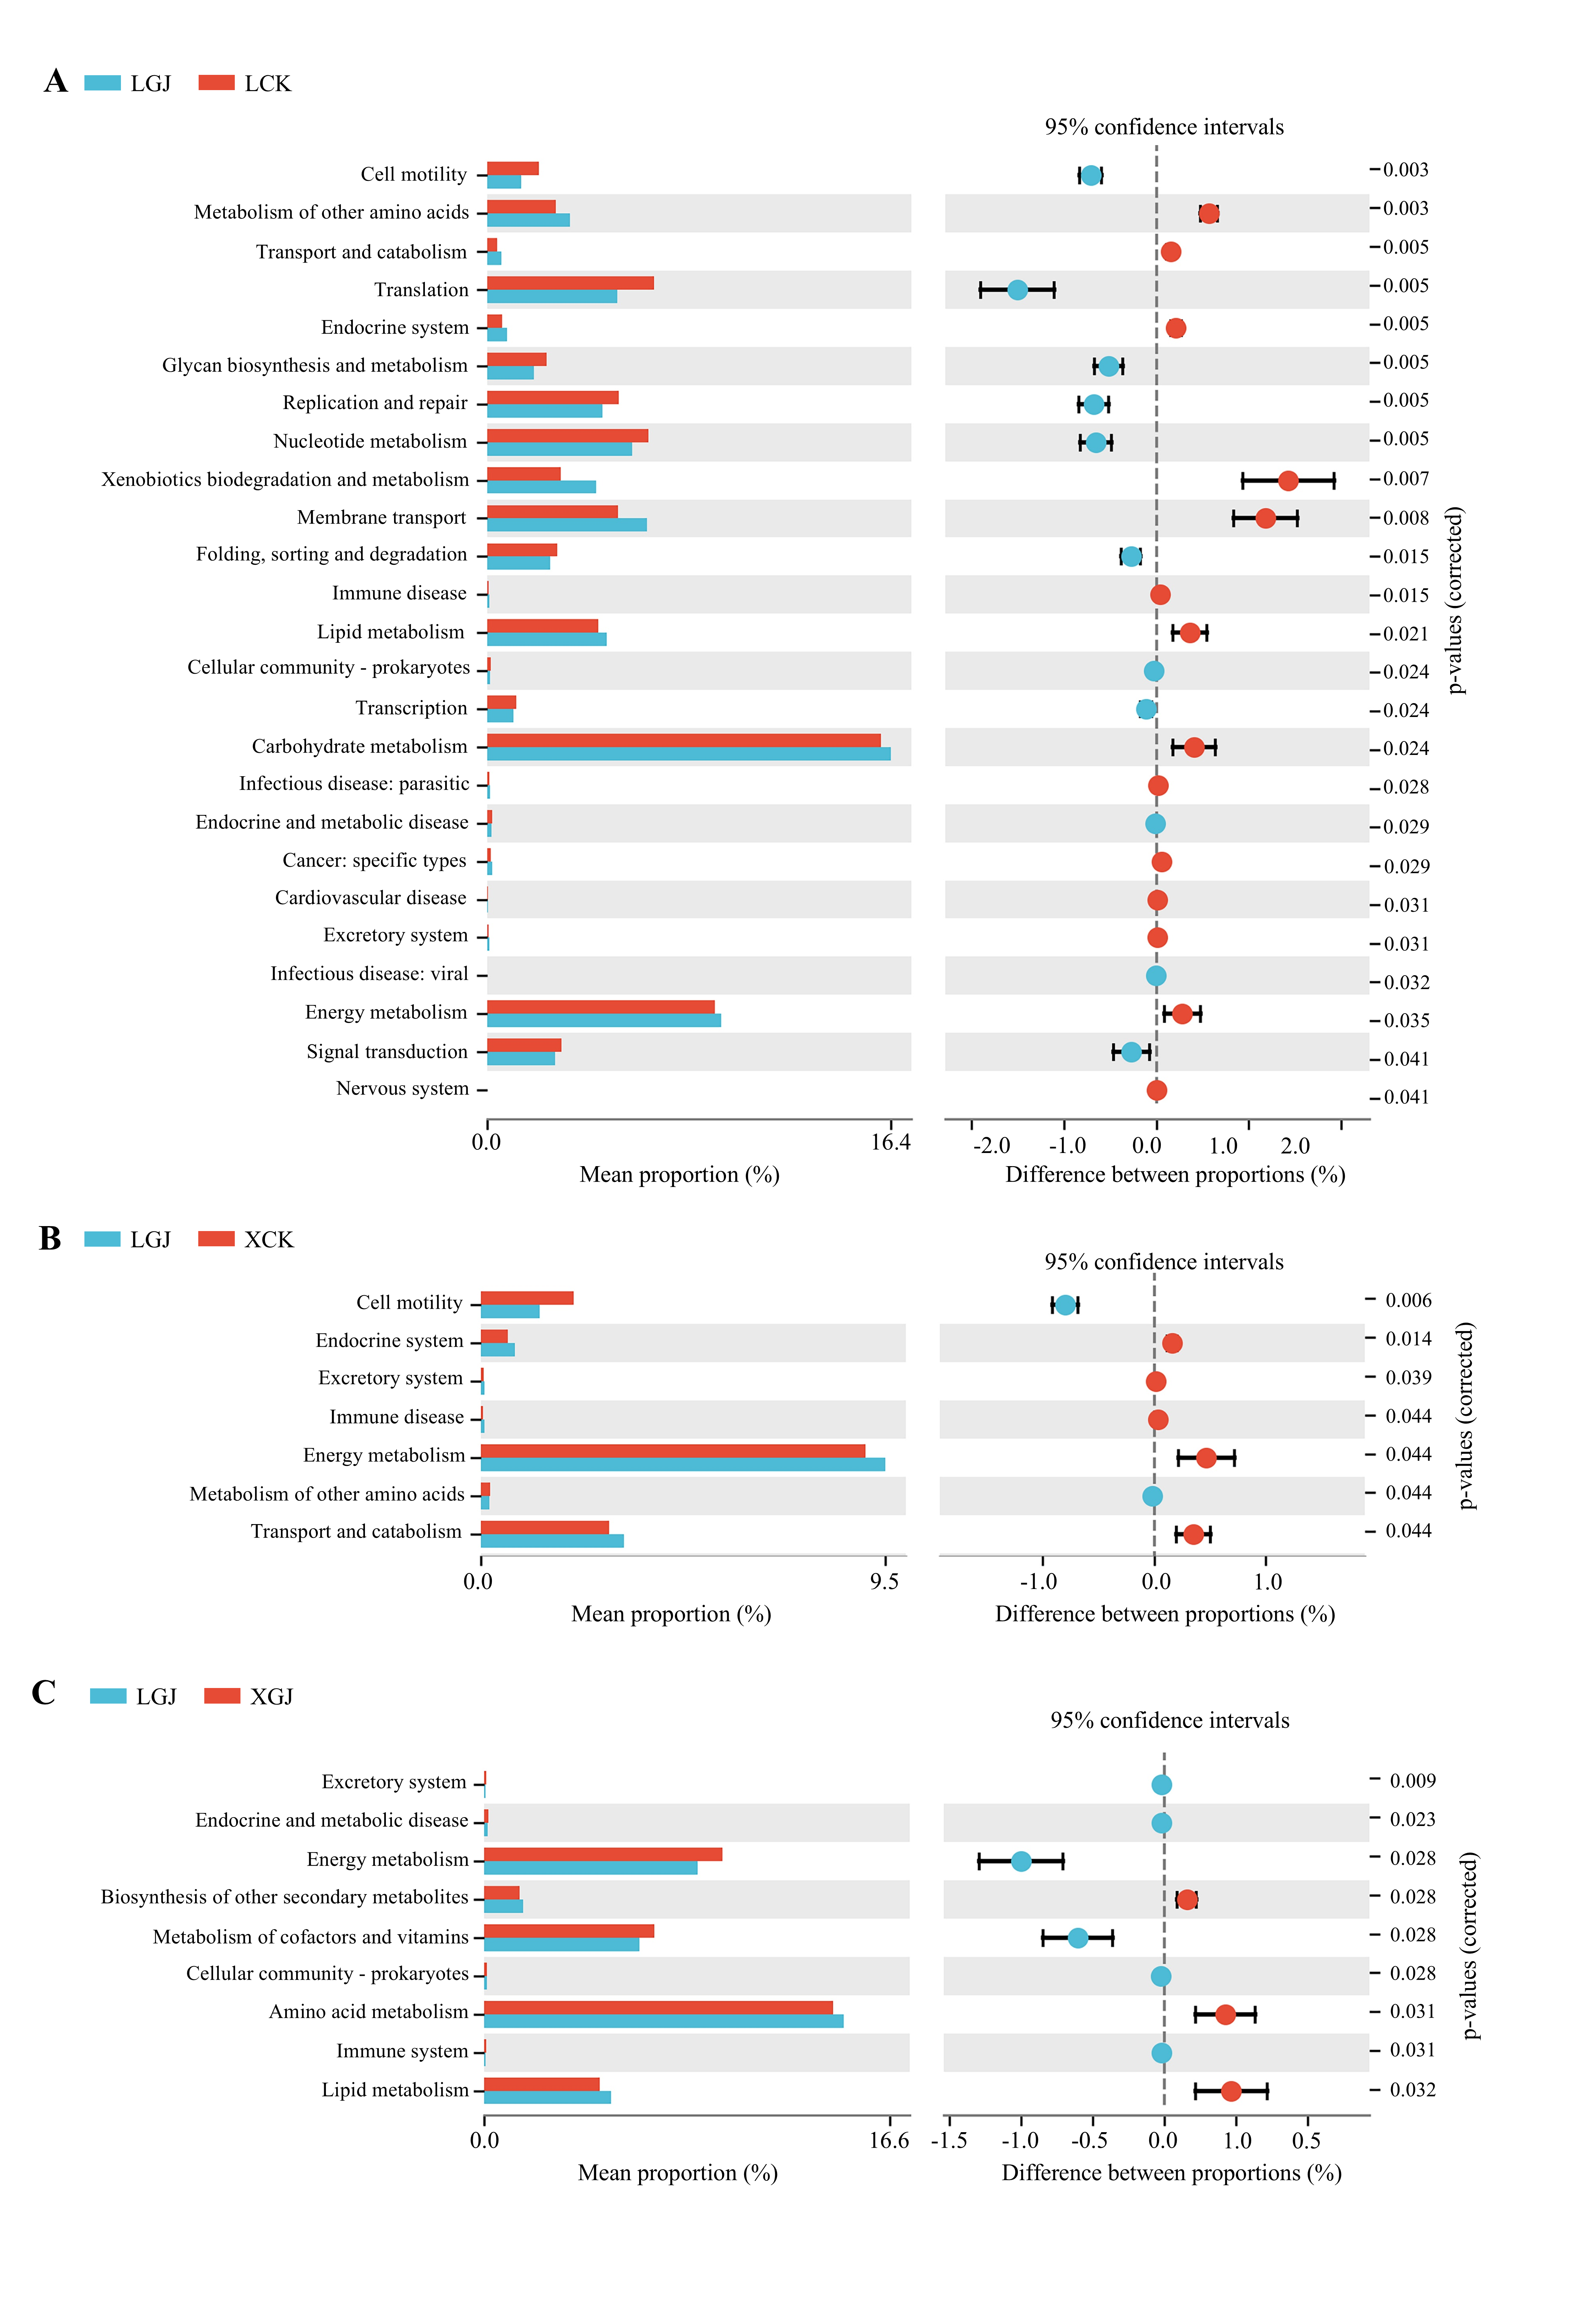


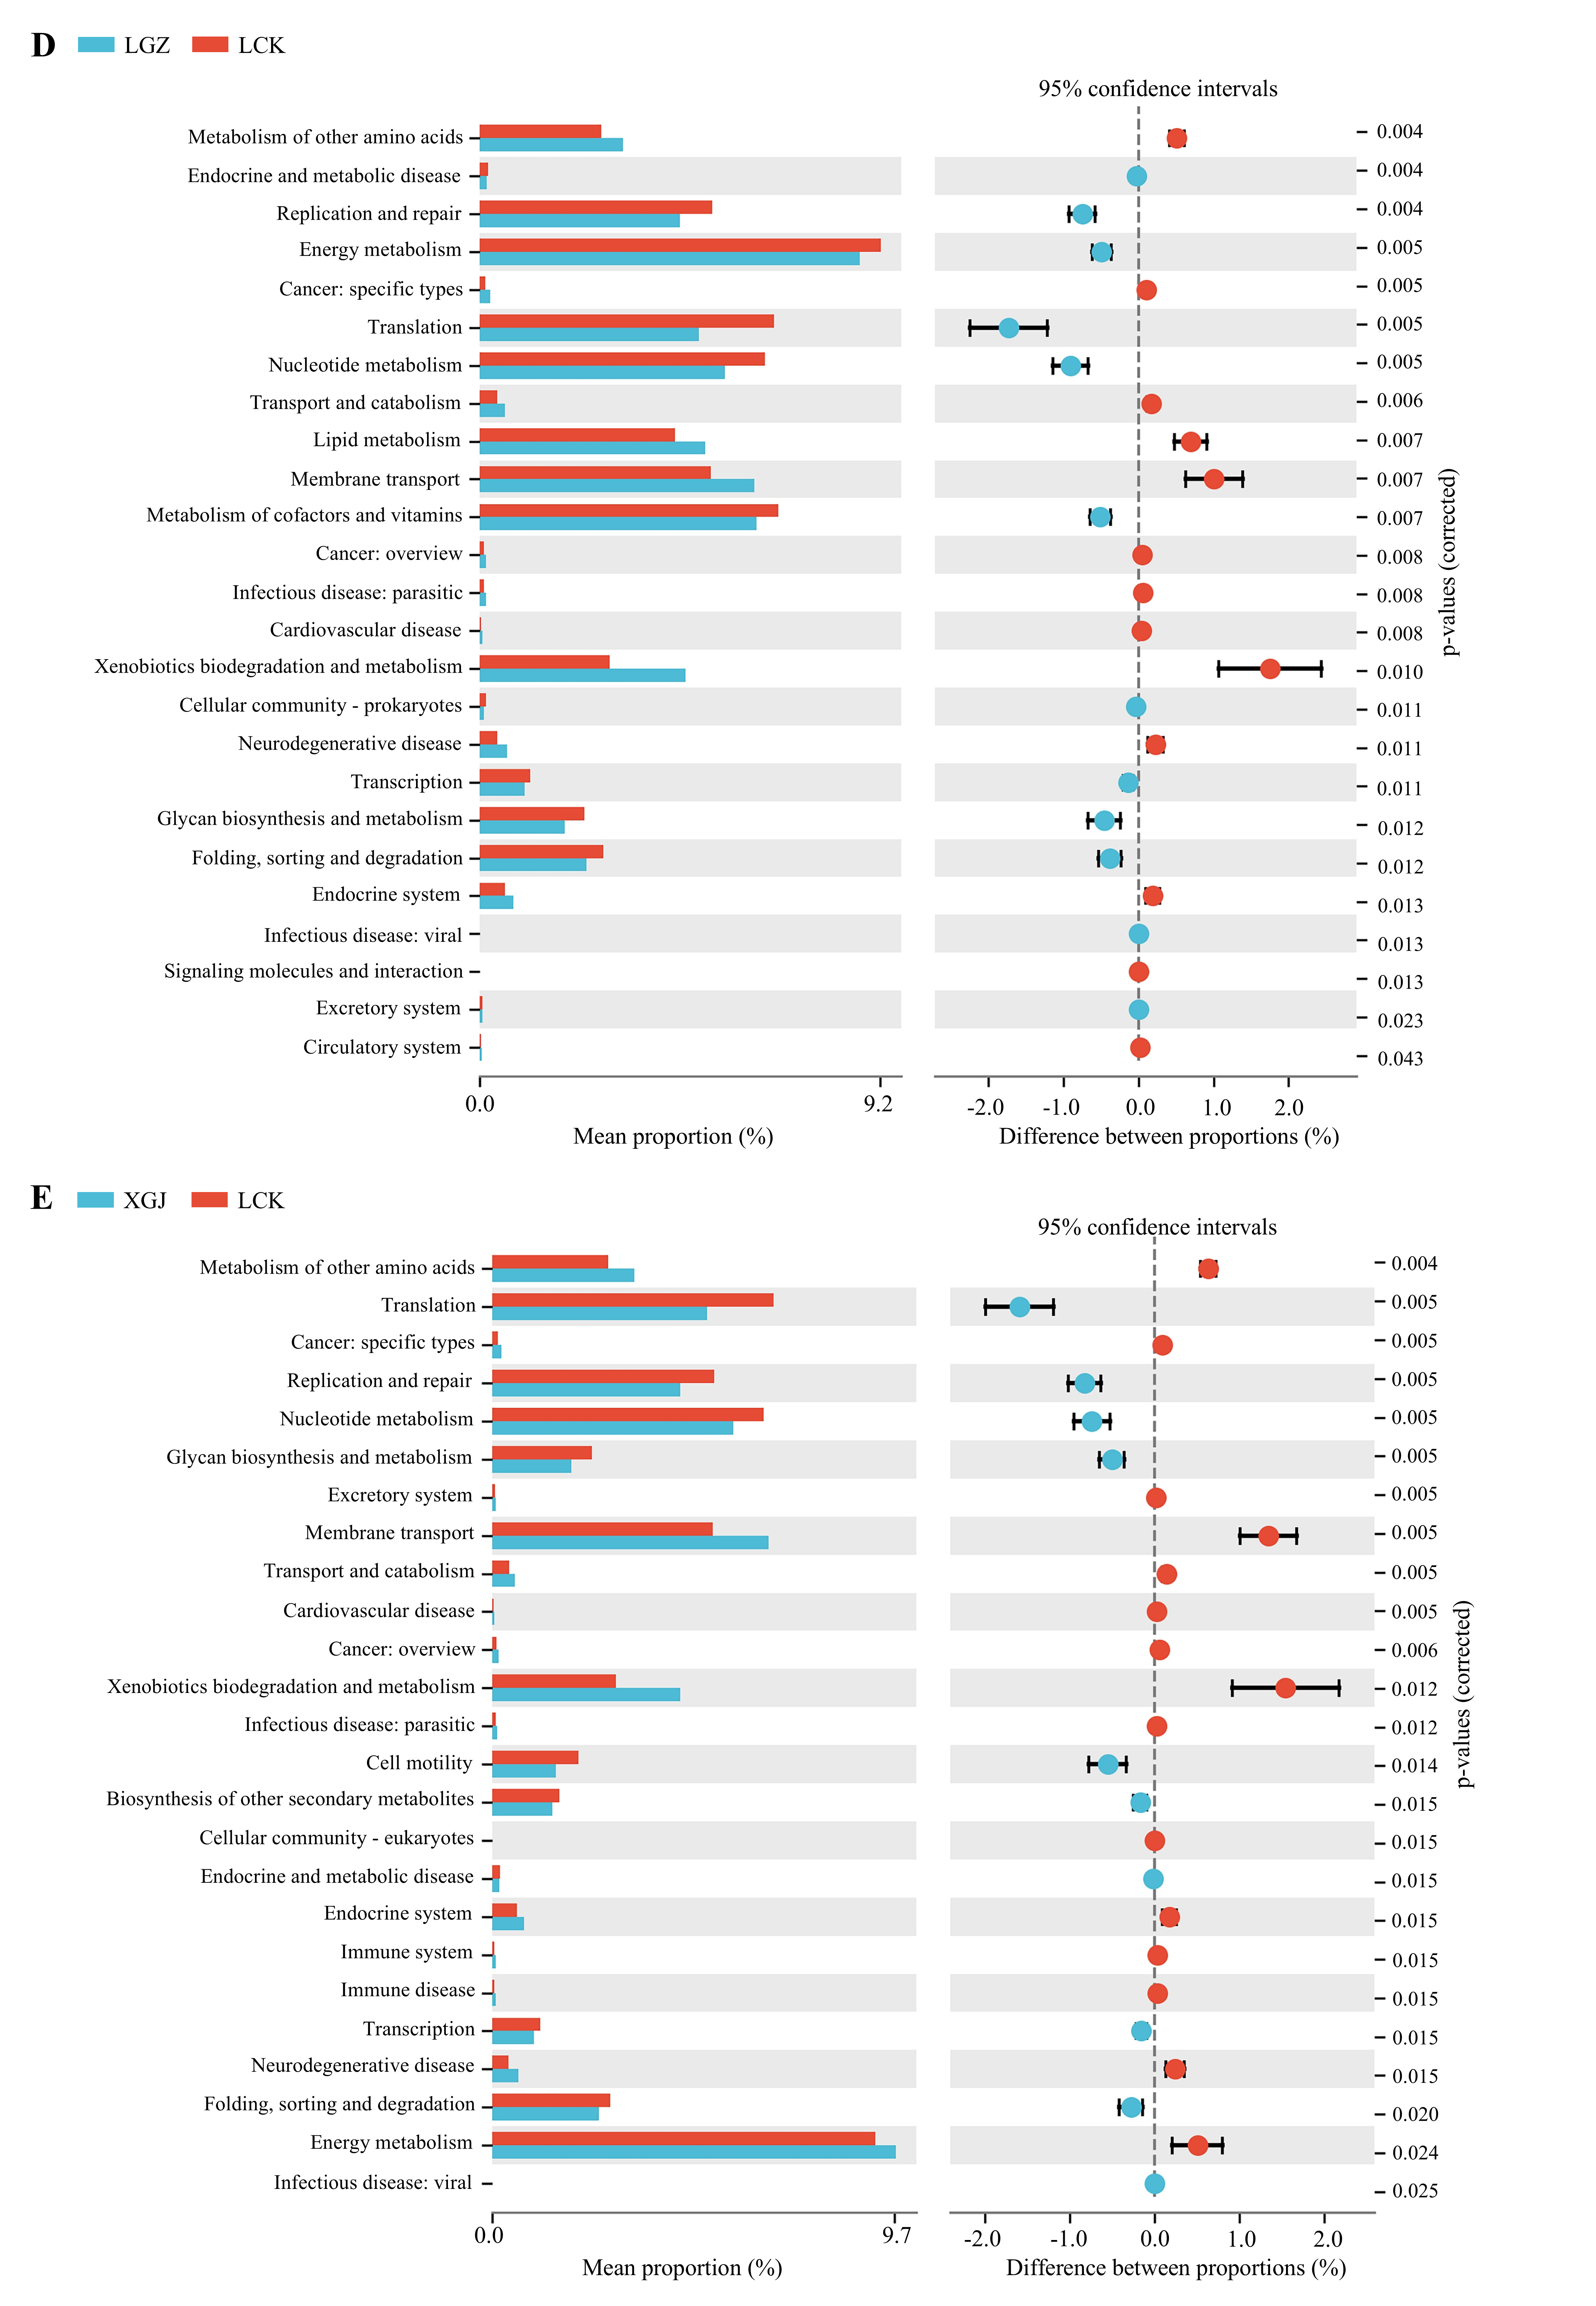


**Supplementary Fig S1**

Bar chart of functional differences (KEGG level 2). (A-E) Pairwise comparison. A p-value less than 0.05 indicates a significant difference, while a p-value less than 0.01 indicates an extremely significant difference.


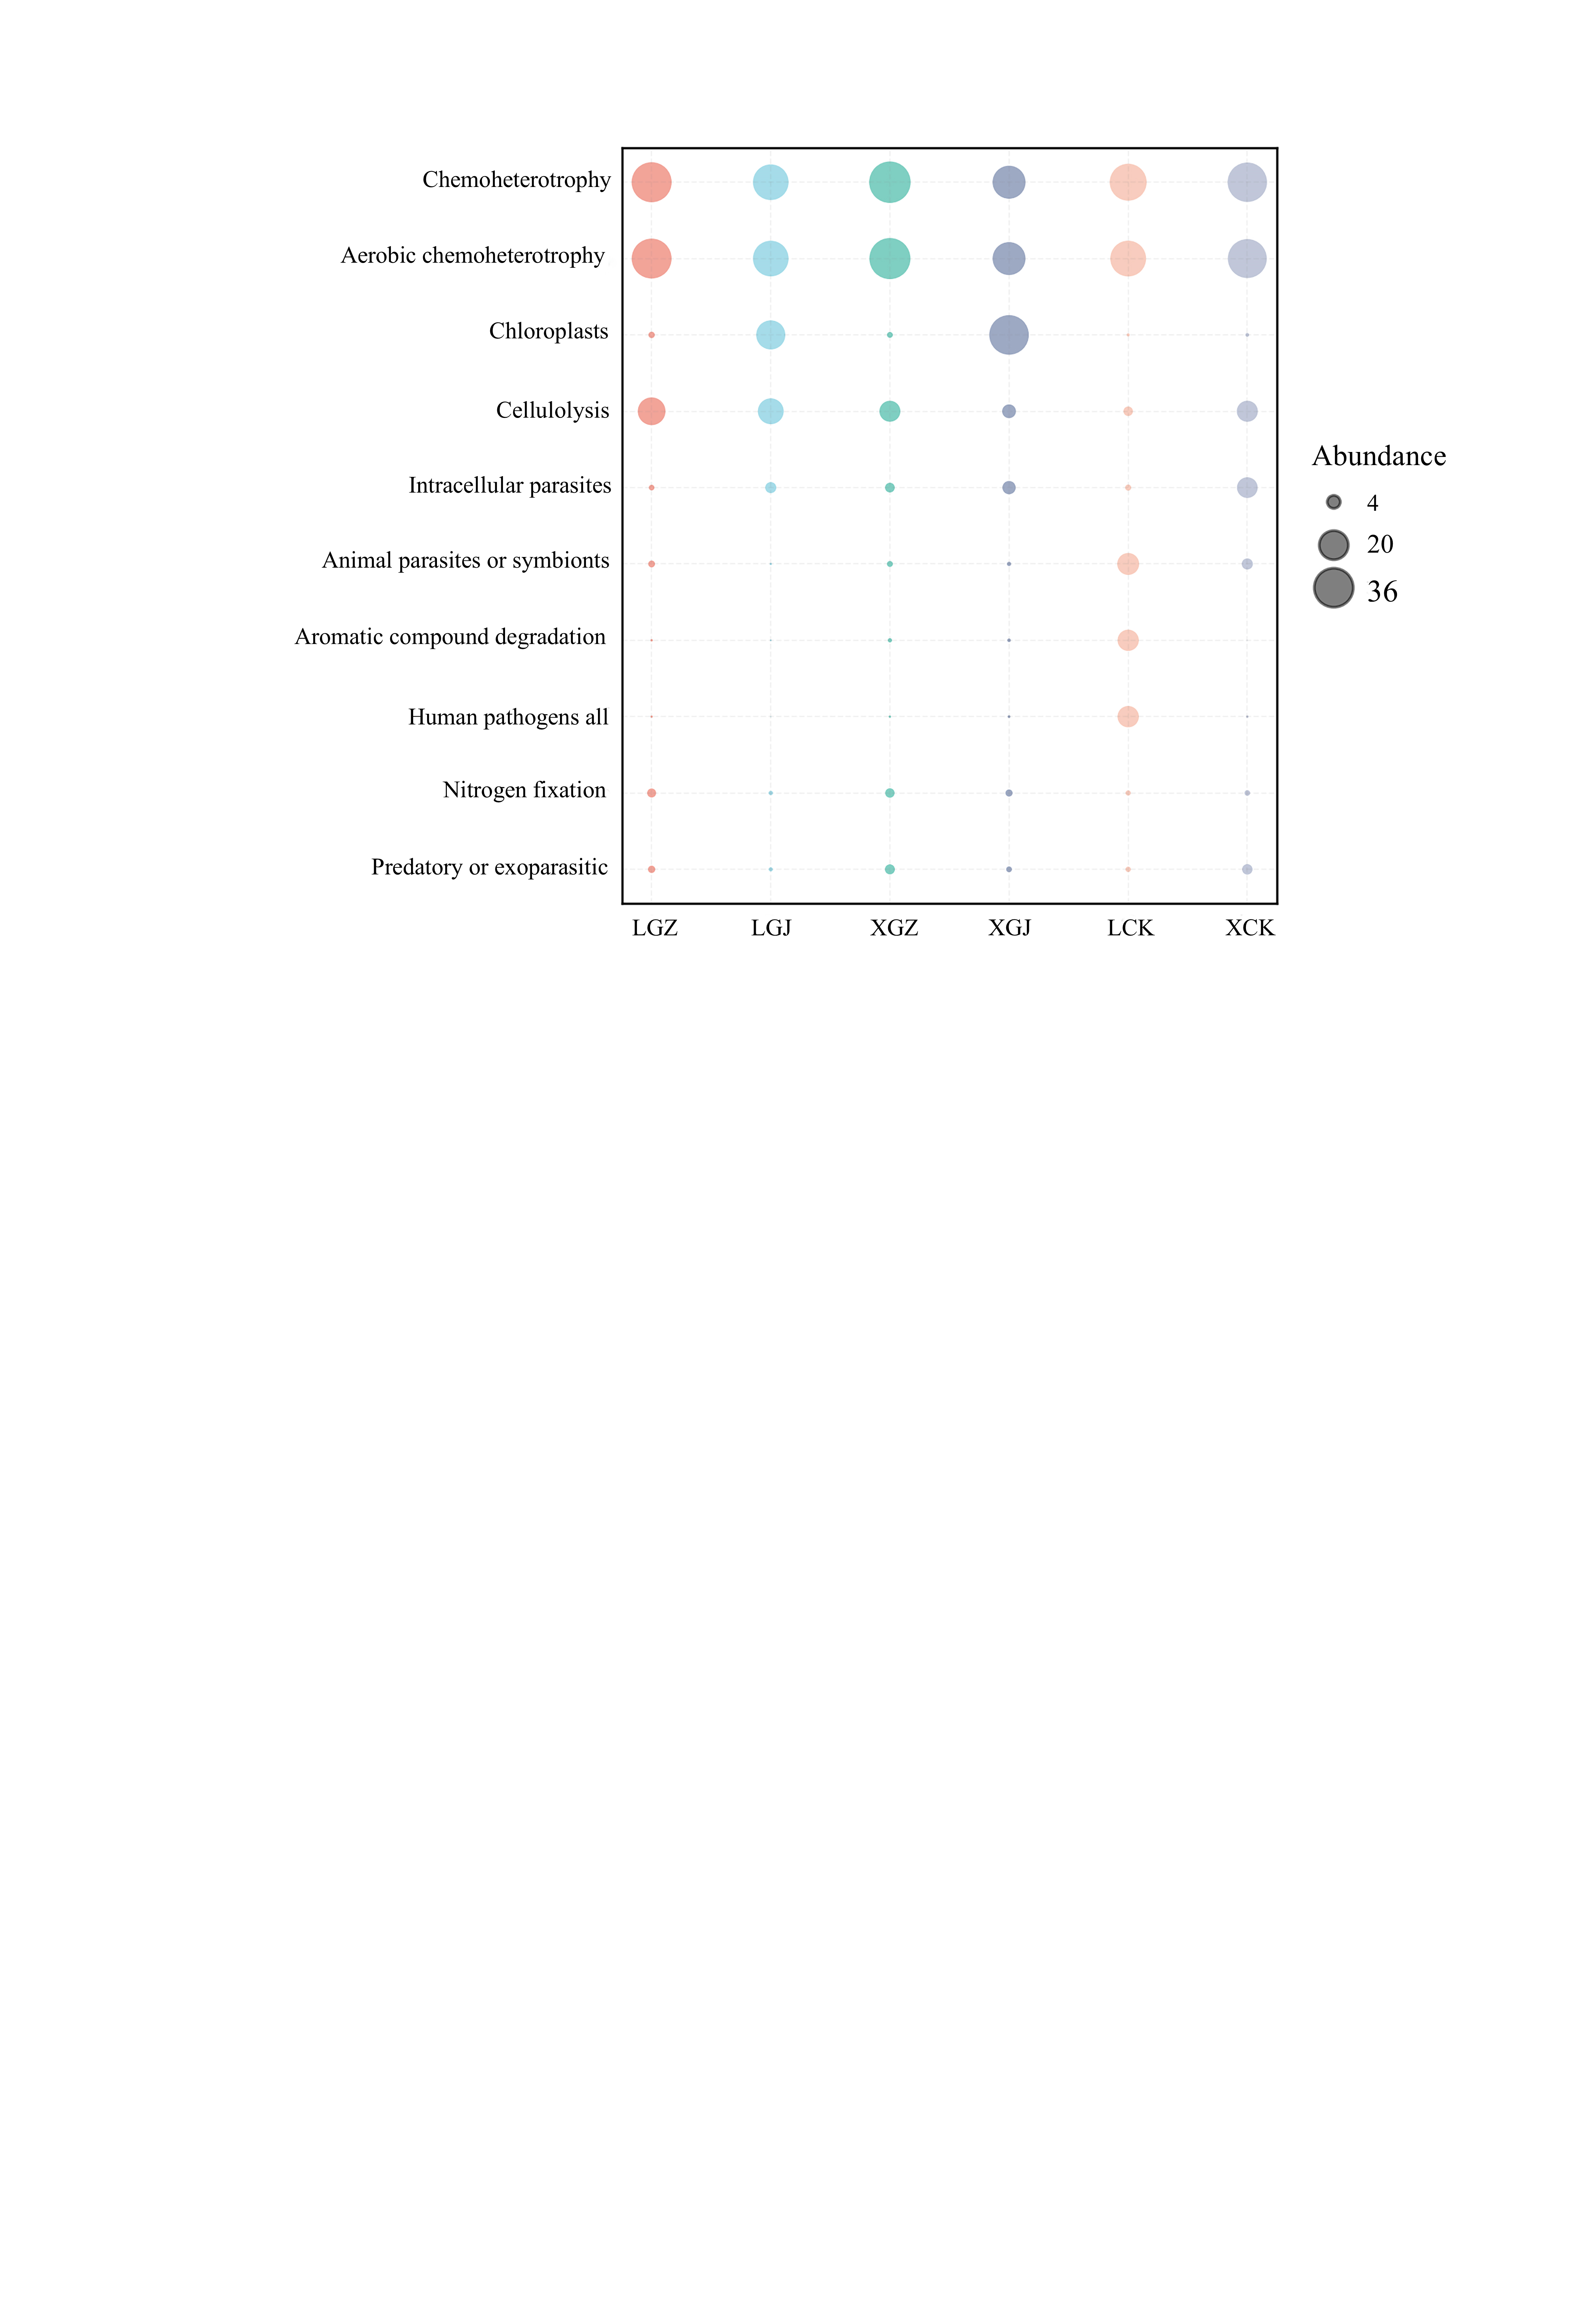


**Supplementary Fig S2**

Abundance bubble map. Bubble size and color indicate the abundance and classification of the genus, respectively
