# Supplementary material for: Vitex rotundifolia L. f. Engineered Microbial Interaction Reverse Desertification: Nitrogen-Fixing Consortia Drive Ecosystem Restoration in Sandy Wetlands of Poyang Lake
Source: Research Square preprint supplement (doi:10.21203/rs.3.rs-7181804/v1), 2025-10-07
Supplement: Supplementary file 2 [file a29809ea69baf3d0e3529425.xlsx]

## Sheet: Soil physicochemical properties
Table S1. Soil physicochemical properties with different stand ages and locations.
Index	LGZ1	LGZ2	LGZ3	LGJ1	LGJ2	LGJ3	XGZ1	XGZ2	XGZ3	XGJ1	XGJ2	XGJ3	LCK1	LCK2	LCK3	XCK1	XCK2	XCK3
Moisture content	4.08073	4.13223	4.427	3.81068	3.62935	3.26305	4.34783	3.9327	4.5961	4.16969	4.09598	3.50168	5.30902	4.88019	4.82186	5.00138	5.32325	5.65292
pH	6.24	6.45	6.65	7.39	6.86	6.46	5.79	6.02	6.34	6.44	6.84	6.87	5.91	5.88	5.45	5.87	5.41	5.33
TN	1.25155	1.33085	1.37698	4.4781	4.85559	4.61171	0.765702	0.779486	0.757881	0.809912	0.836882	0.880871	0.276028	0.247112	0.28606	0.297584	0.287123	0.27976
AN	54.2978	55.7514	51.0562	52.9044	53.2221	54.5904	48.923	47.5031	49.7622	54.868	54.328	52.5318	45.4748	44.3056	47.9258	43.932	44.9101	42.1977
UA	261.197	251.26	254.788	484.096	456.992	447.013	248.209	242.553	230.978	282.83	309.967	304.871	209.544	211.435	223.389	192.903	185.046	197.649
NA	2.49061	2.5237	2.45932	2.16749	2.19699	2.13798	1.68288	1.72491	1.63728	2.39281	2.41695	2.38208	1.46077	1.51084	1.42858	1.69446	1.71323	1.38194

## Sheet: Taxonomic composition
Table S2. The relative abundances of the top ten soil bacterial communities were compared at the phylum level.
phylum	Actinobacteriota	Proteobacteria	Acidobacteriota	Chloroflexi	Planctomycetota	Cyanobacteria	Verrucomicrobiota	Gemmatimonadota	Firmicutes	WPS-2	Unclassified	Unassigned	Other
LGZ	0.25455	0.2347	0.19224	0.06611	0.08657	0.00709	0.04786	0.02694	0.01116	0.0028	0.00407	0.000281963	0.06563
LGJ	0.30728	0.17459	0.14593	0.03266	0.09501	0.15469	0.01791	0.0097	0.00532	0.02774	0.000960101	7.13829e-06	0.0282
XGZ	0.22555	0.22298	0.17559	0.135	0.07777	0.00304	0.0326	0.02855	0.01066	0.00751	0.01226	5.35372e-05	0.06844
XGJ	0.20557	0.25669	0.10557	0.03899	0.06139	0.22733	0.02181	0.01006	0.00655	0.00314	0.00228	4.63989e-05	0.06057
LCK	0.08406	0.11754	0.16125	0.41009	0.08174	0.00126	0.00832	0.01326	0.03193	0.01347	0.02155	0	0.05553
XCK	0.12879	0.1315	0.2105	0.23609	0.07804	0.00218	0.03123	0.04512	0.02678	0.02266	0.00525	1.78457e-05	0.08184
Table S3. The relative abundances of the top ten soil bacterial communities were compared at the genus level.
genus	AD3	Chloroplast	Acidothermus	Bryobacter	Candidatus_Solibacter	Conexibacter	Mycobacterium	Subgroup_2	IMCC26256	WD2101_soil_group	Unclassified	Unassigned	Other
LGZ	0.0076	0.00493	0.09336	0.02911	0.04419	0.01752	0.02737	0.01602	0.00887	0.01206	0.37233	0.000281963	0.36637
LGJ	0.000157042	0.1543	0.12127	0.07809	0.01627	0.03034	0.03386	0.00255	0.00222	0.03743	0.22812	7.13829e-06	0.29539
XGZ	0.05594	0.0024	0.03079	0.02214	0.01905	0.02474	0.01474	0.0209	0.01406	0.01578	0.4	5.35372e-05	0.37939
XGJ	0.00392	0.22452	0.02694	0.02231	0.013	0.01891	0.02042	0.00645	0.00486	0.01316	0.2566	4.63989e-05	0.38887
LCK	0.28912	0.00058534	0.00555	0.01113	0.01374	0.01081	0.00403	0.02717	0.02271	0.000103505	0.30241	0	0.31264
XCK	0.13713	0.000560356	0.0179	0.0272	0.01426	0.01396	0.00863	0.02764	0.03274	0.00473	0.40851	1.78457e-05	0.30672
Table S4. The relative abundances of the top ten soil fungal communities were compared at the phylum level.
phylum	Ascomycota	Basidiomycota	Mucoromycota	Chytridiomycota	Calcarisporiellomycota	Rozellomycota	Kickxellomycota	Glomeromycota	Mortierellomycota	Entorrhizomycota	Unclassified	Other
LGZ	0.57516	0.20053	0.10424	0.00478	0.00212	0.00938	0.00591	0.0047	0.00214	0.000111134	0.09093	5.55112e-16
LGJ	0.82803	0.08933	0.01056	0.00437	0.000166701	0.000290183	0	0.00051245	0.000253138	0	0.0665	3.33067e-16
XGZ	0.67269	0.12686	0.03842	0.0162	0.00948	0.00446	0.00918	0.00443	0.00111	0.000228442	0.11681	0.00013583
XGJ	0.48322	0.43535	0.0073	0.00406	0.00064828	0.00064828	0.00145	0.00192	0.000537146	0	0.06487	3.33067e-16
LCK	0.43873	0.13711	0.00135	0.05708	0.02935	0.000623584	0.000568017	0.00307	0.000234616	2.46964e-05	0.33186	3.33067e-16
XCK	0.5473	0.07338	0.0021	0.01413	0.01111	0.01502	7.40892e-05	0.00112	0.000160527	0.000327227	0.33528	2.22045e-16
Table S5. The relative abundances of the top ten soil fungal communities were compared at the genus level.
genus	Penicillium	Gongronella	Aspergillus	Sphaerobolus	Agaricus	Fusarium	Leucoagaricus	Acremonium	Calcarisporiella	Purpureocillium	Unclassified	Other
LGZ	0.07829	0.10025	0.02662	0	0.06911	0.01615	0.00925	0.01968	0.00212	0.02386	0.46968	0.18498
LGJ	0.08615	0.01023	0.00423	0	0.0192	0.01697	0.00013583	0.0063	0.000166701	0.00677	0.7556	0.09424
XGZ	0.1376	0.03225	0.07097	0.00161	6.1741e-06	0.02491	0.012	0.02398	0.00948	0.01613	0.49367	0.1774
XGJ	0.00897	0.00529	0.01021	0.0936	0	0.01511	0.04457	0.00182	0.00064828	0.00306	0.63803	0.17871
LCK	0.0026	0.00109	0.00238	8.02633e-05	0.000426013	0.00232	0.000129656	0.000401316	0.02935	0.000561843	0.89485	0.06581
XCK	0.06032	0.00136	0.01934	0	0.000580365	0.01152	0.00145	0.000969333	0.01111	0.00223	0.73605	0.15506

## Sheet: Alpha diversity of bacterial
Table S6. Alpha diversity index table									Table S7. Analysis of differences in Alpha diversity indices (The differences were statistically significant (p < 0.05).)
Sample	Feature	ACE	Simpson	faith_pd	Chao1	Shannon			Group	method	ACE-pValue	faith-pValue	Feature-pValue	Simpson-pValue	Chao1-pValue	Shannon-pValue
LGJ1	1768	1771.23	0.99	91.552	1768.76	8.783			all	anova	0.00195	0.00045	0.0017	0.00252	0.00199	1.78e-05
LGJ2	1783	1788.57	0.995	90.228	1785.36	9.099			LGZ vs LGJ	t-test	0.000141	0.000149	0.000194	0.0606	0.000155	0.0264
LGJ3	1954	1954	0.993	95.628	1954	9.23			LGZ vs XGZ	t-test	0.619	0.692	0.594	0.285	0.62	0.332
LGZ1	2823	2898.02	0.996	166.697	2898.13	9.679			LGZ vs XGJ	t-test	0.304	0.574	0.272	0.0511	0.307	0.19
LGZ2	3009	3071.56	0.998	179.031	3076.13	10.13			LGZ vs LCK	t-test	8.58e-06	8.26e-05	1.01e-05	0.0422	9.69e-06	0.000952
LGZ3	2877	2926.9	0.995	186.717	2923.63	9.558			LGZ vs XCK	t-test	6.05e-05	0.000195	6.91e-05	0.0623	6.91e-05	0.00607
LCK1	1248	1255.33	0.989	82.261	1253.85	8.079			LGJ vs XGZ	t-test	0.0997	0.0485	0.0987	0.0249	0.0999	0.0453
LCK2	1306	1319.58	0.976	81.372	1317.63	7.694			LGJ vs XGJ	t-test	0.0197	0.0206	0.0188	0.892	0.0198	0.00536
LCK3	1304	1319.32	0.967	78.736	1319.67	7.585			LGJ vs LCK	t-test	0.000961	0.00383	0.000933	0.0823	0.00102	0.00334
XGJ1	3395	3452.93	0.991	157.646	3451.38	9.981			LGJ vs XCK	t-test	0.134	0.269	0.0939	0.283	0.146	0.19
XGJ2	4176	4239.05	0.993	201.871	4238.05	10.464			XGZ vs XGJ	t-test	0.88	0.977	0.87	0.0193	0.882	0.787
XGJ3	2739	2743.55	0.995	135.622	2740.57	10.023			XGZ vs LCK	t-test	0.0438	0.0312	0.0416	0.0344	0.044	0.00472
XGZ1	2662	2682.85	0.998	118.282	2685.32	10.194			XGZ vs XCK	t-test	0.0796	0.0558	0.0751	0.014	0.0801	0.024
XGZ2	2575	2601.23	0.996	171.376	2595.9	9.617			XGJ vs LCK	t-test	0.00727	0.0125	0.00664	0.0778	0.00731	0.000388
XGZ3	4656	4752.52	0.999	208.485	4754.77	11.038			XGJ vs LCK	t-test	0.0148	0.0243	0.0134	0.281	0.015	0.00128
XCK1	1653	1674.18	0.995	99.104	1673.8	8.889			LCK vs XCK	t-test	0.00161	0.00321	0.0016	0.0594	0.00176	0.00337
XCK2	1598	1626.89	0.994	91.829	1625.55	8.677
XCK3	1757	1788.09	0.994	96.841	1791.81	8.847

## Sheet: Alpha diversity of fungal
Table S8. Alpha diversity index table									Table S9. Analysis of differences in Alpha diversity indices (The differences were statistically significant (p < 0.05).)
Sample	Feature	ACE	Simpson	faith_pd	Chao1	Shannon			Group	method	ACE-pValue	faith-pValue	Feature-pValue	Simpson-pValue	Chao1-pValue	Shannon-pValue
LGJ1	533	560.082	0.947	126.532	555.015	5.562			all	anova	0.0243	4.12e-05	0.0218	0.444	0.0247	0.145
LGJ2	393	420.844	0.903	91.936	418.875	5.055			LGZ vs LGJ	t-test	0.386	0.395	0.296	0.186	0.371	0.0516
LGJ3	475	497.976	0.946	104.154	492.368	5.69			LGZ vs XGZ	t-test	0.172	0.102	0.163	0.151	0.169	0.215
LGZ1	565	587.916	0.95	117.786	582.625	5.87			LGZ vs XGJ	t-test	0.621	0.489	0.662	0.31	0.635	0.265
LGZ2	651	672.553	0.96	148.648	667.554	6.242			LGZ vs LCK	t-test	0.117	0.00387	0.129	0.264	0.116	0.101
LGZ3	445	445	0.958	103.822	445	6.022			LGZ vs XCK	t-test	0.144	0.375	0.123	0.358	0.148	0.284
LCK1	763	812.632	0.891	269.653	796.843	5.458			LGJ vs XGZ	t-test	0.0279	0.0151	0.0258	0.0826	0.0264	0.0405
LCK2	790	899.249	0.957	240.308	880.941	5.949			LGJ vs XGJ	t-test	0.258	0.194	0.235	0.831	0.261	0.852
LCK3	596	622.966	0.941	218.444	620.73	5.285			LGJ vs LCK	t-test	0.035	0.00167	0.0269	0.933	0.0323	0.668
XGJ1	443	453.909	0.934	106.553	448.556	5.386			LGJ vs XCK	t-test	0.324	0.842	0.436	0.971	0.357	0.973
XGJ2	618	651.687	0.876	144.727	645.368	4.928			XGZ vs XGJ	t-test	0.536	0.567	0.475	0.177	0.524	0.113
XGJ3	752	788.439	0.966	171.539	779.845	6.253			XGZ vs LCK	t-test	0.48	0.00447	0.7	0.132	0.498	0.059
XGZ1	632	654.135	0.966	143.904	647.667	6.386			XGZ vs XCK	t-test	0.009	0.00163	0.00987	0.185	0.00939	0.131
XGZ2	641	659.018	0.96	156.105	656.968	6.076			XGJ vs LCK	t-test	0.311	0.0132	0.359	0.895	0.314	0.928
XGZ3	780	800.81	0.984	159.101	793.067	7.122			XGJ vs LCK	t-test	0.128	0.179	0.127	0.829	0.136	0.875
XCK1	469	481.146	0.976	115.106	482.533	6.38			LCK vs XCK	t-test	0.017	0.000941	0.0123	0.918	0.0162	0.797
XCK2	367	380.794	0.914	110.609	379.568	4.726
XCK3	434	448.456	0.909	103.69	449.03	5.144

## Sheet: Differential abundance analysis
Table S10. The classification level of the most abundant ASV in soil bacteria was determined through the Linear Discriminant Analysis (LDA) effect size (LEfSe) analysis.						Table S11. The classification level of the most abundant ASV in soil fungal was determined through the Linear Discriminant Analysis (LDA) effect size (LEfSe) analysis.
k__Bacteria.p__Dependentiae	2.90087			-		k__Fungi 6	0 -
k__Archaea.p__Crenarchaeota	3.98135			0.0274044		k__Fungi	p__Basidiomycota	c__Agaricomycetes	o__Corticiales 2	8474783132 -
k__Bacteria.p__Chloroflexi.c__JG30_KF_CM66.o__JG30_KF_CM66	3.77632			0.0227299		k__Fungi	p__Ascomycota	c__Sordariomycetes	o__Hypocreales	f__Cordycipitaceae	g__Cordyceps 3	25744108222 0	192261407254
k__Bacteria.p__Proteobacteria.c__Alphaproteobacteria.o__Acetobacterales.f__Acetobacteraceae.g__Craurococcus_Caldovatus	3.37343			0.0188312		k__Fungi	p__Ascomycota	c__Sordariomycetes	o__Magnaporthales 4	39856432041 -
k__Bacteria.p__Proteobacteria.c__Alphaproteobacteria.o__Rhizobiales	4.94813	LGZ	4.54439	0.0142919		k__Fungi	p__Ascomycota	c__Sordariomycetes	o__Xylariales	f__Microdochiaceae 3	51648509416 -
k__Bacteria.p__Bacteroidota.c__Bacteroidia.o__Chitinophagales.f__Chitinophagaceae.g__Edaphobaculum	2.81502			0.032643		k__Fungi	p__Ascomycota	c__Dothideomycetes	o__Mycosphaerellales 3	10444068223 -
k__Bacteria.p__Acidobacteriota.c__Thermoanaerobaculia.o__Thermoanaerobaculales.f__Thermoanaerobaculaceae.g__Subgroup_10	3.3581			-		k__Fungi	p__Ascomycota	c__Dothideomycetes	o__Venturiales	f__Venturiaceae 4	43471651237 A 4	13485760775 0	429725413987
k__Bacteria.p__Verrucomicrobiota.c__Verrucomicrobiae.o__Verrucomicrobiales.f__Verrucomicrobiaceae	2.78559			0.0199152		k__Fungi	p__Basidiomycota	c__Agaricomycetes	o__Agaricales	f__Agaricaceae	g__Agaricus 4	83955876443 A 4	59591594847 0	296161059835
k__Bacteria.p__Proteobacteria.c__Gammaproteobacteria.o__Aeromonadales.f__Aeromonadaceae.g__Aeromonas	3.66817			0.024748		k__Fungi	p__Ascomycota	c__Sordariomycetes	o__Hypocreales	f__Ophiocordycipitaceae 4	39684731503 -
k__Bacteria.p__Firmicutes.c__Bacilli.o__Erysipelotrichales.f__Erysipelotrichaceae.g__Turicibacter	2.9086			0.0192033		k__Fungi	p__Ascomycota	c__Sordariomycetes	o__Hypocreales	f__Cordycipitaceae	g__Lecanicillium 4	24435032155 0	397229675999
k__Bacteria.p__Dependentiae.c__Babeliae.o__Babeliales.f__Babeliaceae	2.85142			-		k__Fungi	p__Ascomycota	c__Dothideomycetes	o__Botryosphaeriales	f__Botryosphaeriaceae	g__Botryosphaeria 3	99251652527 -
k__Bacteria.p__Actinobacteriota.c__Acidimicrobiia.o__Acidimicrobiales	2.60949			-		k__Fungi	p__Ascomycota	c__Orbiliomycetes	o__Orbiliales	f__Orbiliaceae 2	7448159713 -
k__Bacteria.p__Bacteroidota.c__Bacteroidia.o__Cytophagales.f__Microscillaceae	3.24457			-		k__Fungi	p__Ascomycota	c__Sordariomycetes	o__Chaetosphaeriales	f__Chaetosphaeriaceae	g__Chloridium	s__Chloridium_aseptatum 3	92634197643 -
k__Bacteria.p__Proteobacteria.c__Alphaproteobacteria.o__Rhizobiales.f__Devosiaceae.g__Devosia	2.92734			0.0446156		k__Fungi	p__Ascomycota	c__Sordariomycetes	o__Xylariales	f__Xylariaceae 2	59675343585 -
k__Bacteria.p__Armatimonadota.c__Armatimonadia	2.87698			-		k__Fungi	p__Ascomycota	c__Dothideomycetes	o__Pleosporales	f__Pleosporales_fam_Incertae_sedis 2	63567150188 -
k__Bacteria.p__Bacteroidota.c__Kapabacteria.o__Kapabacteriales.f__Kapabacteriales.g__Kapabacteriales	2.76752			0.0293889		k__Fungi	p__Ascomycota	c__Eurotiomycetes 5	42314209733 E 5	05645777662 0	29520801481
k__Bacteria.p__Planctomycetota.c__vadinHA49.o__vadinHA49.f__vadinHA49	2.41602			-		k__Fungi	p__Ascomycota	c__Dothideomycetes	o__Pleosporales	f__Phaeosphaeriaceae	g__Sclerostagonospora 3	48430041079 -
k__Bacteria.p__Myxococcota.c__Myxococcia	3.88641			0.014156		k__Fungi	p__Mucoromycota	c__Endogonomycetes 2	80341068657 -
k__Bacteria.p__Proteobacteria.c__Alphaproteobacteria.o__Caulobacterales.f__Hyphomonadaceae.g__SWB02	2.78813			-		k__Fungi	p__Ascomycota	c__Dothideomycetes	o__Pleosporales	f__Latoruaceae	g__Matsushimamyces 4	12321387225 -
k__Bacteria.p__Actinobacteriota.c__Actinobacteria.o__Micromonosporales.f__Micromonosporaceae	3.95912			0.019924		k__Fungi	p__Ascomycota	c__Sordariomycetes	o__Sordariales	f__Chaetomiaceae	g__Arcopilus	s__Arcopilus_aureus 3	59403057751 -
k__Bacteria.p__Bacteroidota.c__Bacteroidia	4.39539	XGJ	4.03644	0.0214838		k__Fungi	p__Ascomycota	c__Sordariomycetes	o__Togniniales	f__Togniniaceae	g__Phaeoacremonium	s__Phaeoacremonium_parasiticum 3	78091231665 0	209108165683
k__Bacteria.p__Proteobacteria.c__Gammaproteobacteria.o__Burkholderiales.f__Burkholderiaceae.g__Burkholderia_Caballeronia_Paraburkholderia.s__Paraburkholderia_tuberum	2.44478			-		k__Fungi	p__Ascomycota	c__Dothideomycetes	o__Pleosporales	f__Didymosphaeriaceae	g__Paraconiothyrium	s__Paraconiothyrium_thysanolaenae 2	65389632198 -
k__Bacteria.p__Chloroflexi.c__Ktedonobacteria.o__Ktedonobacterales.f__Ktedonobacteraceae	4.81547			-		k__Fungi	p__Ascomycota	c__Sordariomycetes	o__Hypocreales	f__Bionectriaceae 3	99496479378 -
k__Bacteria.p__Chloroflexi.c__KD4_96	3.37147			0.0155182		k__Fungi	p__Basidiomycota	c__Tremellomycetes	o__Filobasidiales	f__Piskurozymaceae 2	55400145543 -
k__Bacteria.p__Verrucomicrobiota.c__Chlamydiae.o__Chlamydiales	4.22208			0.00927268		k__Fungi	p__Ascomycota	c__Saccharomycetes	o__Saccharomycetales	f__Lipomycetaceae	g__Lipomyces	s__Lipomyces_okinawensis 3	02610190877 -
k__Bacteria.p__Patescibacteria.c__Saccharimonadia.o__Saccharimonadales.f__Saccharimonadaceae.g__TM7a	2.86434			0.0137067		k__Fungi	p__Basidiomycota	c__Agaricomycetes	o__Agaricales	f__Entolomataceae	g__Clitopilus	s__Clitopilus_prunulus 3	01328993301 -
k__Bacteria.p__Acidobacteriota.c__Subgroup_5.o__Subgroup_5	3.27359			0.0291948		k__Fungi	p__Ascomycota	c__Leotiomycetes	o__Thelebolales	f__Pseudeurotiaceae 3	00276106627 0	217094675423
k__Bacteria.p__Myxococcota.c__Polyangia.o__Blfdi19.f__Blfdi19.g__Blfdi19	2.30856			-		k__Fungi	p__Chytridiomycota	c__Rhizophlyctidomycetes	o__Rhizophlyctidales	f__Rhizophlyctidaceae	g__Rhizophlyctis	s__Rhizophlyctis_rosea 3	81873788129 -
k__Bacteria.p__Myxococcota.c__Polyangia.o__mle1_27.f__mle1_27.g__mle1_27	2.72868			0.0208178		k__Fungi	p__Basidiomycota	c__Agaricomycetes	o__Agaricales	f__Cortinariaceae 3	65626952178 -
k__Bacteria.p__Chloroflexi.c__Chloroflexia.o__Thermomicrobiales.f__JG30_KF_CM45.g__JG30_KF_CM45	3.80177			-		k__Fungi	p__Ascomycota	c__Sordariomycetes	o__Ophiostomatales	f__Ophiostomataceae 2	91442510283 -
k__Bacteria.p__Planctomycetota.c__OM190.o__OM190	3.11011			-		k__Fungi	p__Basidiomycota	c__Cystobasidiomycetes	o__Erythrobasidiales	f__Erythrobasidiales_fam_Incertae_sedis 2	40335731858 -
k__Bacteria.p__Proteobacteria.c__Gammaproteobacteria.o__KF_JG30_C25	3.55989			0.0134845		k__Fungi	p__Mortierellomycota 3	32964956066 -
k__Bacteria.p__Proteobacteria.c__Gammaproteobacteria.o__Burkholderiales.f__Nitrosomonadaceae.g__IS_44	3.35739			-		k__Fungi	p__Basidiomycota	c__Agaricomycetes	o__Hymenochaetales 3	11485591716 -
k__Bacteria.p__Acidobacteriota.c__Thermoanaerobaculia.o__Thermoanaerobaculales	3.3581			-		k__Fungi	p__Ascomycota	c__Eurotiomycetes	o__Onygenales 4	70750092798 -
k__Bacteria.p__Proteobacteria.c__Gammaproteobacteria.o__Aeromonadales.f__Aeromonadaceae	3.66817			0.024748		k__Fungi	p__Ascomycota	c__Sordariomycetes	o__Sordariales	f__Chaetomiaceae 5	0698296392 -
k__Bacteria.p__Actinobacteriota.c__Actinobacteria.o__Pseudonocardiales.f__Pseudonocardiaceae	4.75232	LGJ	4.39444	0.0112466		k__Fungi	p__Ascomycota	c__Leotiomycetes 4	43951864403 0	385771007084
k__Bacteria.p__Bacteroidota.c__Bacteroidia.o__Cytophagales	3.55347			-		k__Fungi	p__Ascomycota	c__Sordariomycetes	o__Hypocreales 4	97158767022 A 4	66277903839 0	106151563172
k__Bacteria.p__Actinobacteriota.c__Actinobacteria.o__Catenulisporales.f__Catenulisporaceae.g__Catenulispora	3.11962			0.0314543		k__Fungi	p__Ascomycota	c__Sordariomycetes	o__Hypocreales	f__Stachybotryaceae	g__Albifimbria 2	51484933146 -
k__Bacteria.p__Chloroflexi.c__Anaerolineae.o__Anaerolineae.f__Anaerolineae.g__Anaerolineae	2.93096			0.00482615		k__Fungi	p__Ascomycota	c__Sordariomycetes	o__Hypocreales	f__Hypocreales_fam_Incertae_sedis	g__Sarocladium 2	80341068657 -
k__Bacteria.p__Chloroflexi.c__KD4_96.o__KD4_96	3.37147			0.0155182		k__Fungi	p__Ascomycota	c__Sordariomycetes	o__Hypocreales	f__Hypocreales_fam_Incertae_sedis	g__Sarocladium	s__Sarocladium_kiliense 2	80341068657 -
k__Bacteria.p__Actinobacteriota.c__Actinobacteria.o__Micromonosporales.f__Micromonosporaceae.g__Actinocatenispora	3.68355			-		k__Fungi	p__Ascomycota	c__Eurotiomycetes	o__Chaetothyriales	f__Herpotrichiellaceae	g__Cladophialophora 4	0624150684 0	199240106465
k__Bacteria.p__Actinobacteriota.c__Actinobacteria.o__Pseudonocardiales.f__Pseudonocardiaceae.g__Amycolatopsis	3.25254			0.0484614		k__Fungi	p__Ascomycota	c__Eurotiomycetes	o__Eurotiales	f__Aspergillaceae 5	31924596346 E 4	9567061303 0	238211479265
k__Bacteria.p__WPS_2.c__WPS_2.o__WPS_2.f__WPS_2.g__WPS_2	4.4431	LGJ	4.03959	0.0220984		k__Fungi	p__Ascomycota	c__Leotiomycetes	o__Helotiales	f__Helotiaceae	g__Scytalidium 3	9085072969 -
k__Bacteria.p__Acidobacteriota.c__Acidobacteriae	5.30849			-		k__Fungi	p__Ascomycota	c__Sordariomycetes	o__Chaetosphaeriales	f__Chaetosphaeriaceae 3	93076714044 -
k__Bacteria.p__Planctomycetota.c__Planctomycetes.o__Gemmatales.f__Gemmataceae.g__Zavarzinella	3.12313			0.0182982		k__Fungi	p__Basidiomycota	c__Agaricomycetes	o__Agaricales	f__Psathyrellaceae	g__Psathyrella 3	73456233694 -
k__Bacteria.p__Nitrospirota.c__Nitrospiria.o__Nitrospirales.f__Nitrospiraceae	3.91449			-		k__Fungi	p__Ascomycota	c__Sordariomycetes	o__Magnaporthales	f__Magnaporthaceae	g__Pseudophialophora	s__Pseudophialophora_panicorum 4	16256437333 -
k__Bacteria.p__Chloroflexi.c__Ktedonobacteria.o__C0119.f__C0119	2.72868			0.0193895		k__Fungi	p__Entorrhizomycota	c__Entorrhizomycetes	o__Entorrhizales 2	51484933146 -
k__Bacteria.p__Actinobacteriota.c__Actinobacteria.o__Micromonosporales.f__Micromonosporaceae.g__Dactylosporangium	2.72284			-		k__Fungi	p__Ascomycota	c__Eurotiomycetes	o__Eurotiales 5	33829895262 E 4	95894535506 0	155723117713
k__Bacteria.p__Verrucomicrobiota.c__Verrucomicrobiae.o__Opitutales	2.83373			0.030873		k__Fungi	p__Ascomycota	c__Sordariomycetes	o__Hypocreales	f__Stachybotryaceae	g__Albifimbria	s__Albifimbria_verrucaria 2	51484933146 -
k__Bacteria.p__Bacteroidota.c__Bacteroidia.o__Chitinophagales.f__Chitinophagaceae.g__Pseudoflavitalea	3.17274			-		k__Fungi	p__Ascomycota	c__Lecanoromycetes	o__Ostropales 3	5023806909 -
k__Bacteria.p__Proteobacteria.c__Alphaproteobacteria.o__Rhizobiales.f__Hyphomicrobiaceae.g__Pedomicrobium	3.1077			-		k__Fungi	p__Ascomycota	c__Sordariomycetes	o__Trichosphaeriales	f__Trichosphaeriaceae	g__Nigrospora	s__Nigrospora_zimmermanii 2	78179953756 -
k__Bacteria.p__FCPU426.c__FCPU426	2.84037			-		k__Fungi	p__Ascomycota	c__Sordariomycetes	o__Glomerellales 2	7448159713 0	3659572663
k__Bacteria.p__Myxococcota.c__Polyangia.o__Polyangiales.f__Phaselicystidaceae.g__Phaselicystis	2.39769			-		k__Fungi	p__Ascomycota	c__Dothideomycetes	o__Capnodiales 3	68433522392 0	232755111431
k__Bacteria.p__Patescibacteria.c__Saccharimonadia.o__Saccharimonadales.f__Saccharimonadales.g__Saccharimonadales	3.31453			0.0131624		k__Fungi	p__Ascomycota	c__Eurotiomycetes	o__Chaetothyriales	f__Trichomeriaceae	g__Arthrocladium 2	88748347487 -
k__Bacteria.p__Proteobacteria.c__Alphaproteobacteria.o__Rhizobiales.f__Hyphomicrobiaceae	3.51968			0.0280407		k__Fungi	p__Ascomycota	c__Eurotiomycetes	o__Eurotiales	f__Trichocomaceae 4	41122994168 -
k__Bacteria.p__Verrucomicrobiota.c__Chlamydiae.o__Chlamydiales.f__cvE6.g__cvE6	2.69558			-		k__Fungi	p__Ascomycota	c__Sordariomycetes	o__Hypocreales	f__Bionectriaceae	g__Clonostachys 3	99496479378 -
k__Bacteria.p__Verrucomicrobiota	4.68005	LGZ	4.25593	0.0176191		k__Fungi	p__Basidiomycota	c__Agaricomycetes	o__Agaricales	f__Lycoperdaceae 3	41588591283 -
k__Bacteria.p__Abditibacteriota.c__Abditibacteria.o__Abditibacteriales.f__Abditibacteriaceae	3.19799			0.032258		k__Fungi	p__Mortierellomycota	c__Mortierellomycetes 3	32964956066 -
k__Bacteria.p__Myxococcota.c__Myxococcia.o__Myxococcales.f__Myxococcaceae.g__P3OB_42	2.34508			-		k__Fungi	p__Ascomycota	c__Dothideomycetes	o__Pleosporales	f__Phaeosphaeriaceae	g__Paraphoma 3	40652351352 -
k__Bacteria.p__Verrucomicrobiota.c__Verrucomicrobiae.o__Chthoniobacterales.f__Chthoniobacteraceae.g__Candidatus_Udaeobacter	4.27498			0.0152785		k__Fungi	p__Basidiomycota	c__Cystobasidiomycetes	o__Erythrobasidiales	f__Erythrobasidiales_fam_Incertae_sedis	g__Hasegawazyma	s__Hasegawazyma_lactosa 2	40335731858 -
k__Bacteria.p__Planctomycetota.c__vadinHA49.o__vadinHA49	2.41602			-		k__Fungi	p__Ascomycota	c__Dothideomycetes	o__Mycosphaerellales	f__Mycosphaerellaceae	g__Staninwardia	s__Staninwardia_suttonii 2	94590949933 -
k__Bacteria.p__Proteobacteria	5.40943	XGJ	4.83717	0.023599		k__Fungi	p__Rozellomycota 4	17671557079 0	218916993145
k__Bacteria.p__Actinobacteriota.c__Actinobacteria.o__Streptosporangiales.f__Streptosporangiaceae.g__Thermocatellispora.s__Thermocatellispora_sp	2.85364			-		k__Fungi	p__Ascomycota	c__Lecanoromycetes 4	04487979419 -
k__Bacteria.p__Proteobacteria.c__Alphaproteobacteria.o__Rhizobiales.f__Xanthobacteraceae.g__Xanthobacteraceae.s__Rhizobiales_bacterium	2.94174			-		k__Fungi	p__Ascomycota	c__Dothideomycetes	o__Cladosporiales 3	84017907446 -
k__Bacteria.p__Planctomycetota.c__Phycisphaerae.o__Tepidisphaerales.f__WD2101_soil_group.g__WD2101_soil_group	4.57326	LGJ	4.23315	0.0174529		k__Fungi	p__Chytridiomycota	c__Rhizophlyctidomycetes 3	82919362381 -
k__Bacteria.p__Acidobacteriota.c__Acidobacteriae.o__Acidobacteriales.f__Acidobacteriaceae_Subgroup_1.g__Granulicella	3.14141			-		k__Fungi	p__Ascomycota	c__Dothideomycetes	o__Dothideales	f__Saccotheciaceae	g__Aureobasidium	s__Aureobasidium_melanogenum 2	83979148453 -
k__Bacteria.p__RCP2_54.c__RCP2_54.o__RCP2_54.f__RCP2_54.g__RCP2_54	3.76927			0.0161763		k__Fungi	p__Ascomycota	c__Sordariomycetes	o__Sordariales	f__Lasiosphaeriaceae	g__Echria	s__Echria_gigantospora 2	71999238758 -
k__Bacteria.p__Actinobacteriota.c__Actinobacteria.o__Frankiales.f__Geodermatophilaceae	3.38571			0.0467554		k__Fungi	p__Ascomycota	c__Orbiliomycetes	o__Orbiliales 2	7448159713 -
k__Bacteria.p__Planctomycetota.c__Planctomycetes.o__Isosphaerales.f__Isosphaeraceae.g__Aquisphaera	3.44424			-		k__Fungi	p__Ascomycota	c__Eurotiomycetes	o__Chaetothyriales	f__Trichomeriaceae	g__Arthrocladium	s__Arthrocladium_tropicale 2	88748347487 -
k__Bacteria.p__Proteobacteria.c__Alphaproteobacteria.o__Rhizobiales.f__Xanthobacteraceae	4.88848	LGZ	4.46157	0.0110322		k__Fungi	p__Ascomycota	c__Sordariomycetes	o__Hypocreales	f__Hypocreales_fam_Incertae_sedis	g__Stilbella 2	65389632198 -
k__Bacteria.p__Planctomycetota.c__Planctomycetes.o__Pirellulales.f__Pirellulaceae.g__Pir4_lineage	2.83134			-		k__Fungi	p__Glomeromycota	c__Glomeromycetes	o__Diversisporales 3	5658197216 -
k__Bacteria.p__Bacteroidota.c__Bacteroidia.o__Chitinophagales.f__Chitinophagaceae.g__Segetibacter	2.89896			-		k__Fungi	p__Basidiomycota	c__Agaricomycetes	o__Agaricales	f__Cortinariaceae	g__Gymnopilus	s__Gymnopilus_lepidotus 3	65626952178 -
k__Bacteria.p__Patescibacteria.c__Parcubacteria.o__Candidatus_Adlerbacteria	3.02252			-		k__Fungi	p__Ascomycota	c__Sordariomycetes	o__Hypocreales	f__Clavicipitaceae	g__Metarhizium 3	05064484985 -
k__Bacteria.p__Firmicutes.c__Bacilli.o__Bacillales.f__Planococcaceae	3.19206			0.0140376		k__Fungi	p__Ascomycota	c__Sordariomycetes	o__Sordariales	f__Chaetomiaceae	g__Arcopilus 3	84975807949 -
k__Bacteria.p__Proteobacteria.c__Gammaproteobacteria.o__Burkholderiales.f__Alcaligenaceae	2.48213			-		k__Fungi	p__Ascomycota	c__Sordariomycetes	o__Trichosphaeriales	f__Trichosphaeriaceae	g__Nigrospora 2	78179953756 -
k__Bacteria.p__Proteobacteria.c__Gammaproteobacteria.o__Burkholderiales.f__Oxalobacteraceae.g__Massilia	2.97911			-		k__Fungi	p__Calcarisporiellomycota	c__Calcarisporiellomycetes	o__Calcarisporiellales 4	46763263926 G 4	15900390469 0	107179499113
k__Bacteria.p__Elusimicrobiota.c__Lineage_IIa	3.14363			0.042659		k__Fungi	p__Ascomycota	c__Sordariomycetes 5	38803827902 -
k__Bacteria.p__Acidobacteriota.c__Acidobacteriae.o__Solibacterales	4.64541			-		k__Fungi	p__Basidiomycota	c__Cystobasidiomycetes	o__Erythrobasidiales	f__Erythrobasidiales_fam_Incertae_sedis	g__Hasegawazyma 2	40335731858 -
k__Bacteria.p__Proteobacteria.c__Alphaproteobacteria.o__Rhizobiales.f__Methyloligellaceae.g__Methyloligellaceae	3.24544			-		k__Fungi	p__Calcarisporiellomycota	c__Calcarisporiellomycetes	o__Calcarisporiellales	f__Calcarisporiellaceae	g__Calcarisporiella 4	46763263926 G 4	16533926191 0	107179499113
k__Bacteria.p__Armatimonadota.c__Chthonomonadetes.o__Chthonomonadales.f__Chthonomonadales.g__Chthonomonadales	3.40626			-		k__Fungi	p__Ascomycota	c__Leotiomycetes	o__Helotiales	f__Helotiaceae	g__Scytalidium	s__Scytalidium_lignicola 3	90784475752 -
k__Bacteria.p__Planctomycetota.c__Planctomycetes.o__Planctomycetales.f__Gimesiaceae	3.16226			0.0363342		k__Fungi	p__Ascomycota	c__Sordariomycetes	o__Coniochaetales	f__Coniochaetaceae	g__Coniochaeta 2	98647311427 0	473374919272
k__Bacteria.p__Verrucomicrobiota.c__Verrucomicrobiae.o__Chthoniobacterales.f__Terrimicrobiaceae.g__Terrimicrobium	2.97584			0.0498082		k__Fungi	p__Mortierellomycota	c__Mortierellomycetes	o__Mortierellales 3	32964956066 -
k__Bacteria.p__Proteobacteria.c__Alphaproteobacteria.o__Tistrellales.f__Geminicoccaceae.g__Candidatus_Alysiosphaera	2.9506			-		k__Fungi	p__Ascomycota	c__Orbiliomycetes	o__Orbiliales	f__Orbiliaceae	g__Arthrobotrys 2	73009271448 -
k__Bacteria.p__Dadabacteria.c__Dadabacteriia.o__Dadabacteriales.f__Dadabacteriales.g__Dadabacteriales	3.32635			0.0142741		k__Fungi	p__Ascomycota	c__Sordariomycetes	o__Melanosporales	f__Ceratostomataceae 2	96375973028 -
k__Bacteria.p__Proteobacteria.c__Gammaproteobacteria.o__Steroidobacterales.f__Steroidobacteraceae	3.38061			0.0240587		k__Fungi	p__Ascomycota	c__Dothideomycetes	o__Dothideales	f__Saccotheciaceae	g__Aureobasidium 3	47810242308 0	411294158528
k__Bacteria.p__Firmicutes.c__Bacilli.o__Alicyclobacillales.f__Alicyclobacillaceae	3.06177			0.030873		k__Fungi	p__Ascomycota	c__Eurotiomycetes	o__Eurotiales	f__Aspergillaceae	g__Aspergillus	s__Aspergillus_penicillioides 3	02102238324 -
k__Bacteria.p__Planctomycetota.c__OM190	3.11011			-		k__Fungi	p__Basidiomycota	c__Agaricomycetes	o__Geastrales 5	03284150669 -
k__Bacteria.p__Acidobacteriota.c__Acidobacteriae.o__Bryobacterales	4.8926	LGJ	4.51098	0.0289775		k__Fungi	p__Basidiomycota	c__Tremellomycetes	o__Tremellales	f__Rhynchogastremataceae	g__Papiliotrema 2	7448159713 0	235420418997
k__Bacteria.p__Patescibacteria.c__Saccharimonadia.o__Saccharimonadales.f__Saccharimonadaceae	2.86434			0.0137067		k__Fungi	p__Mucoromycota	c__Mucoromycetes	o__Mucorales	f__Rhizopodaceae	g__Rhizopus 3	38275021926 -
k__Bacteria.p__Firmicutes.c__Bacilli.o__Alicyclobacillales	3.06177			0.030873		k__Fungi	p__Ascomycota	c__Pezizomycetes	o__Pezizales 2	72507191311 0	250336722347
k__Bacteria.p__Proteobacteria.c__Alphaproteobacteria.o__Rhodospirillales.f__Magnetospirillaceae	2.66995			-		k__Fungi	p__Basidiomycota	c__Agaricomycetes	o__Agaricales	f__Tricholomataceae	g__Mycena 3	65980518159 -
k__Bacteria.p__Actinobacteriota.c__Actinobacteria.o__Frankiales.f__Acidothermaceae.g__Acidothermus	5.08374	LGJ	4.74328	0.0149901		k__Fungi	p__Ascomycota	c__Sordariomycetes	o__Sordariales	f__Lasiosphaeriaceae 3	42100133689 -
k__Bacteria.p__Chloroflexi.c__KD4_96.o__KD4_96.f__KD4_96.g__KD4_96	3.37147			0.0155182		k__Fungi	p__Ascomycota	c__Sordariomycetes	o__Melanosporales 2	96375973028 -
k__Bacteria.p__Chloroflexi.c__Ktedonobacteria.o__Ktedonobacterales.f__JG30_KF_AS9.g__JG30_KF_AS9	3.80542			0.00939257		k__Fungi	p__Basidiomycota	c__Malasseziomycetes	o__Malasseziales	f__Malasseziaceae	g__Malassezia 3	47181469924 0	133009483754
k__Bacteria.p__Proteobacteria.c__Gammaproteobacteria.o__Legionellales.f__Legionellaceae	2.81976			-		k__Fungi	p__Ascomycota	c__Dothideomycetes	o__Pleosporales	f__Pleosporaceae	g__Alternaria 3	76646459827 0	405648568311
k__Bacteria.p__Proteobacteria.c__Alphaproteobacteria.o__Dongiales.f__Dongiaceae.g__Dongia.s__bacterium_Ellin314	2.71693			-		k__Fungi	p__Ascomycota	c__Sordariomycetes	o__Sordariales	f__Sordariales_fam_Incertae_sedis	g__Conlarium 3	25297145976 0	398078713512
k__Bacteria.p__Proteobacteria.c__Gammaproteobacteria.o__Burkholderiales.f__Burkholderiaceae	4.52223	XGJ	4.23185	0.0176191		k__Fungi	p__Mucoromycota	c__Umbelopsidomycetes	o__GS23 3	29842933356 -
k__Bacteria.p__Proteobacteria.c__Alphaproteobacteria.o__Rhizobiales.f__Beijerinckiaceae	3.99928			0.0418876		k__Fungi	p__Ascomycota	c__Sordariomycetes	o__Hypocreales	f__Cordycipitaceae 4	29149570105 0	306425853902
k__Bacteria.p__Myxococcota.c__Polyangia.o__mle1_27.f__mle1_27	2.72868			0.0208178		k__Fungi	p__Basidiomycota	c__Agaricomycetes	o__Cantharellales 4	823916785 -
k__Bacteria.p__Actinobacteriota.c__Actinobacteria.o__Corynebacteriales.f__Nocardiaceae	3.03545			0.0434438		k__Fungi	p__Ascomycota	c__Sordariomycetes	o__Melanosporales	f__Ceratostomataceae	g__Harzia 2	96083517726 -
k__Bacteria.p__Actinobacteriota.c__Actinobacteria.o__Frankiales.f__Sporichthyaceae.g__Sporichthya.s__Sporichthya_polymorpha	2.89697			0.0355331		k__Fungi	p__Basidiomycota	c__Tremellomycetes	o__Filobasidiales	f__Piskurozymaceae	g__Solicoccozyma 2	55400145543 -
k__Bacteria.p__Proteobacteria.c__Gammaproteobacteria.o__Salinisphaerales.f__Solimonadaceae.g__Nevskia	2.92927			0.0324217		k__Fungi	p__Basidiomycota	c__Atractiellomycetes 4	1318100851 0	289775034078
k__Bacteria.p__Planctomycetota.c__Planctomycetes.o__Gemmatales.f__Gemmataceae	4.86719	LCK	4.42767	0.00692805		k__Fungi	p__Ascomycota	c__Sordariomycetes	o__Hypocreales	f__Clavicipitaceae 3	36111640175 -
k__Bacteria.p__Actinobacteriota.c__Actinobacteria.o__Corynebacteriales.f__Mycobacteriaceae	4.52965	LGJ	4.14522	0.0244998		k__Fungi	p__Ascomycota	c__Sordariomycetes	o__Magnaporthales	f__Magnaporthaceae	g__Pseudophialophora 4	39738460878 -
k__Bacteria.p__Proteobacteria.c__Alphaproteobacteria.o__Sphingomonadales	4.20686			0.0355161		k__Fungi	p__Ascomycota	c__Sordariomycetes	o__Hypocreales	f__Hypocreaceae 3	98286207443 -
k__Bacteria.p__Abditibacteriota.c__Abditibacteria	3.19799			0.032258		k__Fungi	p__Chytridiomycota	c__Rhizophlyctidomycetes	o__Rhizophlyctidales	f__Rhizophlyctidaceae 3	81873788129 -
k__Bacteria.p__Proteobacteria.c__Gammaproteobacteria.o__Xanthomonadales.f__Xanthomonadaceae.g__Pseudoxanthomonas	2.86436			-		k__Fungi	p__Ascomycota	c__Dothideomycetes	o__Mycosphaerellales	f__Mycosphaerellaceae	g__Staninwardia 2	94590949933 -
k__Bacteria.p__Bacteroidota.c__Bacteroidia.o__Chitinophagales.f__Chitinophagaceae.g__Parafilimonas	3.28173			0.0231736		k__Fungi	p__Mucoromycota	c__Mucoromycetes	o__Mucorales	f__Syncephalastraceae 3	08942653827 0	351606534903
k__Bacteria.p__Patescibacteria.c__Parcubacteria.o__Parcubacteria.f__Parcubacteria	3.21153			-		k__Fungi	p__Basidiomycota	c__Agaricomycetes	o__Agaricales	f__Agaricaceae	g__Leucocoprinus	s__Leucocoprinus_birnbaumii 2	97526489268 -
k__Bacteria.p__Proteobacteria.c__Gammaproteobacteria.o__Xanthomonadales.f__Rhodanobacteraceae.g__Dokdonella	2.78821			-		k__Fungi	p__Ascomycota	c__Dothideomycetes	o__Botryosphaeriales 3	99442192561 -
k__Archaea.p__Crenarchaeota.c__Nitrososphaeria.o__Nitrososphaerales.f__Nitrososphaeraceae	2.93638			0.028705		k__Fungi	p__Ascomycota	c__Leotiomycetes	o__Helotiales	f__Pleuroascaceae	g__Pleuroascus	s__Pleuroascus_nicholsonii 4	40641834474 -
k__Bacteria.p__Verrucomicrobiota.c__Verrucomicrobiae.o__Chthoniobacterales.f__Chthoniobacteraceae.g__Chthoniobacter	3.6308			0.0110689		k__Fungi	p__Ascomycota	c__Sordariomycetes	o__Magnaporthales	f__Magnaporthaceae 4	39835006561 -
k__Bacteria.p__Acidobacteriota.c__Acidobacteriae.o__Acidobacteriales	5.09083	XCK	4.57133	0.0475772		k__Fungi	p__Basidiomycota	c__Malasseziomycetes	o__Malasseziales 3	47181469924 0	133009483754
k__Bacteria.p__Planctomycetota.c__Phycisphaerae.o__Phycisphaerales	3.03974			0.0277802		k__Fungi	p__Basidiomycota	c__Atractiellomycetes	o__Atractiellales	f__Hoehnelomycetaceae 4	1318100851 0	289775034078
k__Bacteria.p__Myxococcota.c__Polyangia.o__Polyangiales	3.80445			-		k__Fungi	p__Basidiomycota	c__Agaricomycetes	o__Hymenochaetales	f__Schizoporaceae 2	85503145109 -
k__Bacteria.p__Chloroflexi.c__JG30_KF_CM66.o__JG30_KF_CM66.f__JG30_KF_CM66.g__JG30_KF_CM66	3.77632			0.0227299		k__Fungi	p__Ascomycota	c__Sordariomycetes	o__Xylariales	f__Microdochiaceae	g__Selenodriella 3	5132073844 0	379053830104
k__Bacteria.p__Proteobacteria.c__Gammaproteobacteria.o__Burkholderiales.f__A21b.g__A21b	3.08662			0.0270859		k__Fungi	p__Ascomycota	c__Sordariomycetes	o__Diaporthales	f__Diaporthaceae	g__Diaporthe	s__Diaporthe_endophytica 3	23305323093 -
k__Bacteria.p__Proteobacteria.c__Gammaproteobacteria.o__Burkholderiales.f__Burkholderiaceae.g__Burkholderia_Caballeronia_Paraburkholderia.s__Paraburkholderia_terrae	3.5784			0.012852		k__Fungi	p__Calcarisporiellomycota	c__Calcarisporiellomycetes 4	46763263926 G 4	16577641422 0	107179499113
k__Archaea.p__Crenarchaeota.c__Nitrososphaeria.o__Nitrosotaleales.f__Nitrosotaleaceae	3.61251			0.00991452		k__Fungi	p__Ascomycota	c__Eurotiomycetes	o__Chaetothyriales	f__Trichomeriaceae	g__Knufia	s__Knufia_tsunedae 4	24297330778 0	194421131883
k__Bacteria.p__Verrucomicrobiota.c__Chlamydiae.o__Chlamydiales.f__cvE6	2.69558			-		k__Fungi	p__Ascomycota	c__Sordariomycetes	o__Sordariales	f__Chaetomiaceae	g__Thielavia 3	55474959425 -
k__Bacteria.p__Actinobacteriota.c__Actinobacteria.o__Catenulisporales.f__Actinospicaceae	3.61791			-		k__Fungi	p__Chytridiomycota	c__Rhizophlyctidomycetes	o__Rhizophlyctidales 3	82919362381 -
k__Bacteria.p__SAR324_cladeMarine_group_B.c__SAR324_cladeMarine_group_B.o__SAR324_cladeMarine_group_B.f__SAR324_cladeMarine_group_B.g__SAR324_cladeMarine_group_B.s__bacterium_enrichment	2.59398			0.0483151		k__Fungi	p__Basidiomycota	c__Agaricomycetes	o__Russulales	f__Peniophoraceae	g__Peniophora 2	83589644065 0	482614780554
k__Bacteria.p__Methylomirabilota.c__Methylomirabilia.o__Rokubacteriales.f__Rokubacteriales	3.52804			-		k__Fungi	p__Calcarisporiellomycota	c__Calcarisporiellomycetes	o__Calcarisporiellales	f__Calcarisporiellaceae 4	46763263926 G 4	15361046509 0	107179499113
k__Bacteria.p__Nitrospirota	3.91449			-		k__Fungi	p__Mucoromycota	c__Mucoromycetes	o__Mucorales	f__Rhizopodaceae	g__Rhizopus	s__Rhizopus_microsporus 3	37263682478 -
k__Bacteria.p__Planctomycetota.c__Planctomycetes.o__Isosphaerales.f__Isosphaeraceae.g__Singulisphaera	3.46159			0.0289237		k__Fungi	p__Ascomycota	c__Leotiomycetes	o__Helotiales	f__Helotiaceae 3	90916882709 -
k__Bacteria.p__Chloroflexi.c__Chloroflexia.o__Thermomicrobiales.f__JG30_KF_CM45.g__JG30_KF_CM45.s__bacterium_Ellin6537	3.27768			-		k__Fungi	p__Mucoromycota	c__Mucoromycetes	o__Mucorales	f__Cunninghamellaceae	g__Cunninghamella	s__Cunninghamella_elegans 3	34808066377 -
k__Bacteria.p__Chloroflexi.c__Gitt_GS_136.o__Gitt_GS_136	2.93642			-		k__Fungi	p__Ascomycota	c__Eurotiomycetes	o__Eurotiales	f__Aspergillaceae	g__Aspergillus	s__Aspergillus_aculeatus 3	53251253959 -
k__Bacteria.p__Proteobacteria.c__Alphaproteobacteria.o__Rhizobiales.f__Beijerinckiaceae.g__Methylobacterium_Methylorubrum	3.654			-		k__Fungi	p__Ascomycota	c__Sordariomycetes	o__Magnaporthales	f__Magnaporthaceae	g__Pseudophialophora	s__Pseudophialophora_schizachyrii 4	39630935574 -
k__Bacteria.p__Verrucomicrobiota.c__Verrucomicrobiae.o__Pedosphaerales.f__Pedosphaeraceae.g__Pedosphaera	3.02399			-		k__Fungi	p__Ascomycota	c__Leotiomycetes	o__Helotiales	f__Pleuroascaceae 4	40641834474 -
k__Bacteria.p__Actinobacteriota.c__Actinobacteria.o__Frankiales.f__Acidothermaceae.g__Acidothermus.s__Thermomonosporaceae_bacterium	3.31835			-		k__Fungi	p__Mucoromycota	c__Mucoromycetes	o__Mucorales	f__Cunninghamellaceae 5	0035330509 A 4	7133557456 0	426589552412
k__Bacteria.p__Actinobacteriota.c__Actinobacteria.o__Pseudonocardiales.f__Pseudonocardiaceae.g__Longimycelium	3.03114			-		k__Fungi	p__Basidiomycota	c__Tremellomycetes	o__Tremellales 3	73307756803 0	170263794038
k__Bacteria.p__Acidobacteriota.c__Thermoanaerobaculia.o__Thermoanaerobaculales.f__Thermoanaerobaculaceae	3.3581			-		k__Fungi	p__Ascomycota	c__Sordariomycetes	o__Sordariales	f__Lasiosphaeriaceae	g__Arnium 3	26769471658 -
k__Bacteria.p__Myxococcota.c__Myxococcia.o__Myxococcales.f__Anaeromyxobacteraceae.g__Anaeromyxobacter	3.77113			0.0358445		k__Fungi	p__Ascomycota	c__Sordariomycetes	o__Hypocreales	f__Ophiocordycipitaceae	g__Purpureocillium	s__Purpureocillium_lilacinum 4	37749817001 -
k__Bacteria.p__Bacteroidota.c__Bacteroidia.o__Chitinophagales.f__Chitinophagaceae.g__Terrimonas	2.85363			-		k__Fungi	p__Ascomycota	c__Dothideomycetes	o__Pleosporales	f__Phaeosphaeriaceae 4	30098440987 -
k__Bacteria.p__Proteobacteria.c__Alphaproteobacteria.o__Elsterales.f__URHD0088	3.49121			0.0126204		k__Fungi	p__Ascomycota	c__Sordariomycetes	o__Trichosphaeriales 2	78179953756 -
k__Bacteria.p__Proteobacteria.c__Gammaproteobacteria.o__KF_JG30_C25.f__KF_JG30_C25	3.55989			0.0134845		k__Fungi	p__Ascomycota	c__Sordariomycetes	o__Sordariales	f__Chaetomiaceae	g__Chaetomium 4	5963460938 -
k__Bacteria.p__Proteobacteria.c__Gammaproteobacteria.o__JG36_TzT_191.f__JG36_TzT_191.g__JG36_TzT_191	3.3575			0.0109578		k__Fungi	p__Ascomycota	c__Sordariomycetes	o__Chaetosphaeriales	f__Chaetosphaeriaceae	g__Chloridium 3	92634197643 -
k__Bacteria.p__Chloroflexi.c__Ktedonobacteria.o__Ktedonobacterales.f__JG30_KF_AS9	3.80542			0.00939257		k__Fungi	p__Ascomycota	c__Sordariomycetes	o__Sordariales	f__Chaetomiaceae	g__Humicola	s__Humicola_olivacea 3	1408214802 0	190776608455
k__Bacteria.p__Chloroflexi.c__Anaerolineae	3.65259			0.0435263		k__Fungi	p__Ascomycota	c__Dothideomycetes	o__Pleosporales	f__Pleosporaceae	g__Curvularia 3	79403399397 -
k__Bacteria.p__Verrucomicrobiota.c__Verrucomicrobiae.o__Opitutales.f__Opitutaceae.g__Lacunisphaera	2.52569			-		k__Fungi	p__Ascomycota	c__Sordariomycetes	o__Sordariales	f__Chaetomiaceae	g__Arcopilus	s__Arcopilus_cupreus 3	4054706779 -
k__Bacteria.p__Proteobacteria.c__Alphaproteobacteria.o__Rhizobiales.f__Beijerinckiaceae.g__Bosea	2.97585			-		k__Fungi	p__Ascomycota	c__Dothideomycetes	o__Pleosporales	f__Phaeosphaeriaceae	g__Phaeosphaeria 4	22879926947 -
k__Bacteria.p__RCP2_54.c__RCP2_54	3.76927			0.0161763		k__Fungi	p__Ascomycota	c__Dothideomycetes	o__Mycosphaerellales	f__Teratosphaeriaceae 2	33464150621 -
k__Bacteria.p__Myxococcota.c__Polyangia.o__Polyangiales.f__BIrii41	3.01046			0.0363876		k__Fungi	p__Ascomycota	c__Dothideomycetes	o__Venturiales 4	43658487145 A 4	09416630823 0	14136856575
k__Bacteria.p__Nitrospirota.c__Nitrospiria	3.91449			-		k__Fungi	p__Ascomycota	c__Sordariomycetes	o__Sordariales	f__Chaetomiaceae	g__Achaetomium 3	00805740608 -
k__Bacteria.p__Bacteroidota.c__Bacteroidia.o__Chitinophagales.f__Chitinophagaceae	4.27498			0.0297961		k__Fungi	p__Ascomycota	c__Sordariomycetes	o__Togniniales	f__Togniniaceae 3	78091231665 0	383833506899
k__Bacteria.p__Actinobacteriota.c__Actinobacteria.o__Streptomycetales.f__Streptomycetaceae.g__Streptomyces	4.30717			0.0177869		k__Fungi	p__Ascomycota	c__Sordariomycetes	o__Ophiostomatales	f__Ophiostomataceae	g__Phialocephala 2	91442510283 -
k__Bacteria.p__Actinobacteriota.c__Actinobacteria.o__Kineosporiales.f__Kineosporiaceae	3.10769			0.0298147		k__Fungi	p__Basidiomycota 5	63884265414 -
k__Bacteria.p__Planctomycetota.c__BD7_11.o__BD7_11	3.10157			-		k__Fungi	p__Ascomycota	c__Dothideomycetes	o__Pleosporales	f__Pleosporaceae 4	06218276324 -
k__Bacteria.p__Proteobacteria.c__Gammaproteobacteria.o__Xanthomonadales.f__Xanthomonadaceae	2.89896			-		k__Fungi	p__Basidiomycota	c__Agaricomycetes	o__Cantharellales	f__Tulasnellaceae 3	395878508 0	466380211828
k__Bacteria.p__Bdellovibrionota.c__Oligoflexia.o__0319_6G20.f__0319_6G20.g__0319_6G20	3.19701			-		k__Fungi	p__Basidiomycota	c__Agaricomycetes	o__Agaricales	f__Tricholomataceae 4	5256131669 -
k__Bacteria.p__Verrucomicrobiota.c__Verrucomicrobiae.o__Chthoniobacterales.f__Xiphinematobacteraceae.g__Candidatus_Xiphinematobacter	3.67621			0.042659		k__Fungi	p__Ascomycota	c__Sordariomycetes	o__Hypocreales	f__Hypocreaceae	g__Trichoderma	s__Trichoderma_saturnisporum 2	87693329254 -
k__Bacteria.p__Proteobacteria.c__Gammaproteobacteria.o__Burkholderiales.f__Rhodocyclaceae	2.72286			0.0392716		k__Fungi	p__Basidiomycota	c__Atractiellomycetes	o__Atractiellales	f__Hoehnelomycetaceae	g__Atractiella	s__Atractiella_rhizophila 4	1318100851 0	289775034078
k__Bacteria.p__Patescibacteria.c__Saccharimonadia.o__Saccharimonadales	4.16674			0.0087492		k__Fungi	p__Ascomycota	c__Dothideomycetes	o__Pleosporales 4	6234015914 -
k__Bacteria.p__Bacteroidota.c__Bacteroidia.o__Cytophagales.f__Spirosomaceae	3.06449			-		k__Fungi	p__Ascomycota	c__Sordariomycetes	o__Sordariales	f__Chaetomiaceae	g__Condenascus 4	09742721056 -
k__Bacteria.p__Acidobacteriota.c__Subgroup_5	3.27359			0.0291948		k__Fungi	p__Ascomycota	c__Dothideomycetes	o__Pleosporales	f__Didymellaceae 3	26186517292 0	290494400713
k__Bacteria.p__Verrucomicrobiota.c__Verrucomicrobiae.o__Methylacidiphilales.f__Methylacidiphilaceae	2.74291			0.0129174		k__Fungi	p__Mortierellomycota	c__Mortierellomycetes	o__Mortierellales	f__Mortierellaceae 3	32964956066 -
k__Bacteria.p__Planctomycetota.c__Planctomycetes.o__Planctomycetales.f__Schlesneriaceae	2.90488			0.0360239		k__Fungi	p__Ascomycota	c__Sordariomycetes	o__Togniniales 3	78091231665 0	383833506899
k__Bacteria.p__Acidobacteriota.c__Acidobacteriae.o__Subgroup_13.f__Subgroup_13.g__Subgroup_13	3.90088			0.0212826		k__Fungi	p__Ascomycota	c__Sordariomycetes	o__Xylariales	f__Microdochiaceae	g__Selenodriella	s__Selenodriella_cubensis 3	5132073844 0	379053830104
k__Bacteria.p__Gemmatimonadota.c__Gemmatimonadetes.o__Gemmatimonadales	4.65432			-		k__Fungi	p__Ascomycota	c__Sordariomycetes	o__Hypocreales	f__Stachybotryaceae	g__Xepicula 2	63567150188 -
k__Bacteria.p__Myxococcota.c__Polyangia.o__Polyangiales.f__Sandaracinaceae	3.06581			0.0183694		k__Fungi	p__Ascomycota	c__Eurotiomycetes	o__Chaetothyriales	f__Herpotrichiellaceae	g__Coniosporium 2	72507191311 0	170830821854
k__Bacteria.p__Acidobacteriota.c__Blastocatellia.o__Pyrinomonadales.f__Pyrinomonadaceae.g__RB41	3.18909			0.0357763		k__Fungi	p__Ascomycota	c__Saccharomycetes 3	09806949978 -
k__Bacteria.p__Planctomycetota.c__OM190.o__OM190.f__OM190	3.11011			-		k__Fungi	p__Ascomycota	c__Dothideomycetes	o__Pleosporales	f__Latoruaceae 4	12381916083 -
k__Bacteria.p__Verrucomicrobiota.c__Verrucomicrobiae.o__Opitutales.f__Opitutaceae.g__Opitutus	2.46652			-		k__Fungi	p__Ascomycota	c__Sordariomycetes	o__Hypocreales	f__Nectriaceae	g__Fusarium	s__Fusarium_solani 4	04439590057 -
k__Bacteria.p__Elusimicrobiota	3.27848			-		k__Fungi	p__Ascomycota	c__Sordariomycetes	o__Chaetosphaeriales 3	93076714044 -
k__Bacteria.p__Bdellovibrionota.c__Oligoflexia.o__0319_6G20	3.19701			-		k__Fungi	p__Basidiomycota	c__Agaricomycetes	o__Polyporales	f__Ganodermataceae 3	07160682911 -
k__Bacteria.p__Chloroflexi.c__Ktedonobacteria.o__Ktedonobacterales.f__Ktedonobacteraceae.g__JG30a_KF_32	3.07762			-		k__Fungi	p__Basidiomycota	c__Agaricomycetes	o__Agaricales	f__Omphalotaceae	g__Gymnopus 4	30419053565 -
k__Bacteria.p__Proteobacteria.c__Alphaproteobacteria.o__Rhizobiales.f__Methyloligellaceae	3.25846			-		k__Fungi	p__Ascomycota	c__Dothideomycetes	o__Pleosporales	f__Trematosphaeriaceae 3	54185256585 -
k__Bacteria.p__Acidobacteriota.c__Vicinamibacteria.o__Vicinamibacterales	4.02109			0.0497807		k__Fungi	p__Ascomycota	c__Leotiomycetes	o__Helotiales 4	41060535699 -
k__Bacteria.p__Verrucomicrobiota.c__Verrucomicrobiae.o__Opitutales.f__Opitutaceae	2.82685			0.030873		k__Fungi	p__Basidiomycota	c__Tremellomycetes	o__Filobasidiales 2	55400145543 -
k__Bacteria.p__Acidobacteriota.c__Acidobacteriae.o__Acidobacteriales.f__Koribacteraceae	3.93351			0.0484473		k__Fungi	p__Basidiomycota	c__Agaricomycetes	o__Geastrales	f__Geastraceae 4	21675928711 -
k__Bacteria.p__Chloroflexi.c__Anaerolineae.o__RBG_13_54_9.f__RBG_13_54_9.g__RBG_13_54_9	3.47891			0.0400126		k__Fungi	p__Glomeromycota	c__Glomeromycetes	o__Glomerales	f__Glomeraceae	g__Glomus	s__Glomus_indicum 3	06473131113 -
k__Bacteria.p__Acidobacteriota.c__Acidobacteriae.o__PAUC26f	3.17478			-		k__Fungi	p__Ascomycota	c__Sordariomycetes	o__Coniochaetales	f__Coniochaetaceae	g__Coniochaeta	s__Coniochaeta_canina 2	9519414641 -
k__Bacteria.p__Chloroflexi.c__Chloroflexia.o__Chloroflexales	3.1137			0.0496		k__Fungi	p__Ascomycota	c__Sordariomycetes	o__Hypocreales	f__Stachybotryaceae	g__Alfaria 3	23773149321 0	337733868655
k__Bacteria.p__Actinobacteriota.c__Actinobacteria.o__Micrococcales	3.68614			-		k__Fungi	p__Glomeromycota	c__Glomeromycetes 3	59197717188 -
k__Bacteria.p__Proteobacteria.c__Alphaproteobacteria.o__Rhizobiales.f__Hyphomicrobiaceae.g__Hyphomicrobium.s__Hyphomicrobium_facile	2.85362			-		k__Fungi	p__Basidiomycota	c__Agaricomycetes	o__Agaricales	f__Cortinariaceae	g__Gymnopilus 3	65626952178 -
k__Bacteria.p__Patescibacteria.c__Parcubacteria.o__Candidatus_Adlerbacteria.f__Candidatus_Adlerbacteria.g__Candidatus_Adlerbacteria	3.02252			-		k__Fungi	p__Basidiomycota	c__Agaricomycetes	o__Geastrales	f__Geastraceae	g__Geastrum	s__Geastrum_floriforme 3	88118416969 0	246232289826
k__Bacteria.p__FCPU426.c__FCPU426.o__FCPU426	2.84037			-		k__Fungi	p__Ascomycota	c__Leotiomycetes	o__Helotiales	f__Pleuroascaceae	g__Pleuroascus 4	40641834474 -
k__Bacteria.p__Planctomycetota.c__Planctomycetes.o__Gemmatales.f__Gemmataceae.g__Gemmata.s__Gemmata_sp	2.87066			-		k__Fungi	p__Mucoromycota	c__Mucoromycetes 5	00955511065 A 4	71473712447 0	378759532819
k__Bacteria.p__Planctomycetota.c__Phycisphaerae.o__Tepidisphaerales.f__WD2101_soil_group.g__WD2101_soil_group.s__Planctomycetales_bacterium	3.6896			-		k__Fungi	p__Basidiomycota	c__Agaricomycetes 5	60626408552 F 5	24335790095 0	254335617589
k__Bacteria.p__Patescibacteria.c__Parcubacteria.o__Parcubacteria	3.21153			-		k__Fungi	p__Ascomycota	c__Eurotiomycetes	o__Eurotiales	f__Aspergillaceae	g__Penicillium	s__Penicillium_ornatum 3	09160345753 -
k__Bacteria.p__Acidobacteriota.c__Acidobacteriae.o__Solibacterales.f__Solibacteraceae.g__Candidatus_Solibacter.s__bacterium_Ellin7504	3.24892			-		k__Fungi	p__Ascomycota	c__Sordariomycetes	o__Sordariales	f__Chaetomiaceae	g__Condenascus	s__Condenascus_tortuosus 4	09742721056 -
k__Bacteria.p__Proteobacteria.c__Gammaproteobacteria.o__Pseudomonadales	4.63077	LCK	4.41906	0.0127419		k__Fungi	p__Basidiomycota	c__Ustilaginomycetes	o__Ustilaginales 3	17617973546 0	483849709202
k__Bacteria.p__Bacteroidota.c__Bacteroidia.o__Sphingobacteriales	3.2719			0.0230359		k__Fungi	p__Entorrhizomycota	c__Entorrhizomycetes 2	51484933146 -
k__Bacteria.p__Acidobacteriota.c__Acidobacteriae.o__Acidobacteriales.f__Acidobacteriaceae_Subgroup_1.g__Terracidiphilus	2.65638			-		k__Fungi	p__Mucoromycota	c__Mucoromycetes	o__Mucorales	f__Cunninghamellaceae	g__Gongronella	s__Gongronella_butleri 5	00110599893 A 4	66234169608 0
k__Bacteria.p__Elusimicrobiota.c__Elusimicrobia.o__Lineage_IV	3.23381			0.0252406		k__Fungi	p__Ascomycota	c__Eurotiomycetes	o__Eurotiales	f__Aspergillaceae	g__Aspergillus	s__Aspergillus_flavus 2	92411237023 -
k__Bacteria.p__SAR324_cladeMarine_group_B.c__SAR324_cladeMarine_group_B.o__SAR324_cladeMarine_group_B.f__SAR324_cladeMarine_group_B.g__SAR324_cladeMarine_group_B	2.59398			-		k__Fungi	p__Chytridiomycota 4	75648037736 G 4	4372834263 0	329905426665
k__Bacteria.p__Proteobacteria.c__Alphaproteobacteria.o__Rhizobiales.f__Xanthobacteraceae.g__Xanthobacteraceae	3.12429			-		k__Fungi	p__Ascomycota	c__Sordariomycetes	o__Hypocreales	f__Hypocreaceae	g__Trichoderma 3	98286207443 -
k__Bacteria.p__Myxococcota.c__Polyangia.o__Polyangiales.f__Phaselicystidaceae	2.39769			-		k__Fungi	p__Ascomycota	c__Dothideomycetes	o__Muyocopronales	f__Muyocopronaceae	g__Muyocopron	s__Muyocopron_laterale 3	59675343585 -
k__Bacteria.p__Proteobacteria.c__Alphaproteobacteria.o__Azospirillales	2.99203			-		k__Fungi	p__Basidiomycota	c__Agaricomycetes	o__Agaricales	f__Lycoperdaceae	g__Calvatia 2	79057346186 -
k__Archaea.p__Crenarchaeota.c__Bathyarchaeia	3.86979			-		k__Fungi	p__Mucoromycota	c__Mucoromycetes	o__Mucorales	f__Cunninghamellaceae	g__Gongronella 5	00110599893 A 4	68041256494 0	475772061913
k__Bacteria.p__MBNT15	2.78305			-		k__Fungi	p__Basidiomycota	c__Agaricomycetes	o__Agaricales	f__Marasmiaceae	g__Marasmius 3	73653416544 -
k__Bacteria.p__Chloroflexi.c__Ktedonobacteria.o__B12_WMSP1.f__B12_WMSP1	3.62702			-		k__Fungi	p__Ascomycota	c__Eurotiomycetes	o__Eurotiales	f__Aspergillaceae	g__Penicillium	s__Penicillium_simplicissimum 3	44858485852 -
k__Bacteria.p__Actinobacteriota.c__Actinobacteria.o__Streptosporangiales	3.89461			0.0422716		k__Fungi	p__Ascomycota	c__Sordariomycetes	o__Trichosphaeriales	f__Trichosphaeriaceae 2	78179953756 -
k__Archaea.p__Thermoplasmatota	3.68451			0.0281067		k__Fungi	p__Basidiomycota	c__Agaricomycetes	o__Agaricales	f__Psathyrellaceae 3	73800718375 -
k__Bacteria.p__Planctomycetota.c__Pla4_lineage.o__Pla4_lineage	2.95741			-		k__Fungi	p__Ascomycota	c__Eurotiomycetes	o__Eurotiales	f__Aspergillaceae	g__Penicillium	s__Penicillium_restingae 4	68522176566 E 4	32612317865 0
k__Bacteria.p__Firmicutes.c__Bacilli.o__Brevibacillales.f__Brevibacillaceae	3.43906			0.0084089		k__Fungi	p__Basidiomycota	c__Agaricomycetes	o__Geastrales	f__Geastraceae	g__Nidulariopsis 4	14869874714 -
k__Bacteria.p__Proteobacteria.c__Gammaproteobacteria.o__Pseudomonadales.f__Moraxellaceae.g__Acinetobacter	4.45478			-		k__Fungi	p__Ascomycota	c__Sordariomycetes	o__Hypocreales	f__Nectriaceae	g__Fusarium 4	39630935574 -
k__Bacteria.p__Methylomirabilota.c__Methylomirabilia	3.53488			-		k__Fungi	p__Ascomycota	c__Sordariomycetes	o__Ophiostomatales 2	91442510283 -
k__Bacteria.p__Proteobacteria.c__Gammaproteobacteria.o__Burkholderiales.f__Nitrosomonadaceae.g__Ellin6067	3.31376			-		k__Fungi	p__Ascomycota	c__Dothideomycetes	o__Pleosporales	f__Phaeosphaeriaceae	g__Phaeosphaeria	s__Phaeosphaeria_ampeli 3	33464150621 -
k__Archaea.p__Crenarchaeota.c__Nitrososphaeria.o__Nitrososphaerales	2.93638			0.028705		k__Fungi	p__Ascomycota	c__Sordariomycetes	o__Hypocreales	f__Ophiocordycipitaceae	g__Hirsutella 2	7448159713 -
k__Bacteria.p__Dependentiae.c__Babeliae	2.90087			-		k__Fungi	p__Ascomycota	c__Sordariomycetes	o__Hypocreales	f__Ophiocordycipitaceae	g__Hirsutella	s__Hirsutella_minnesotensis 2	56872471225 -
k__Bacteria.p__Proteobacteria.c__Alphaproteobacteria.o__Sphingomonadales.f__Sphingomonadaceae.g__Novosphingobium	3.06313			0.012852		k__Fungi	p__Ascomycota	c__Dothideomycetes	o__Pleosporales	f__Phaeosphaeriaceae	g__Phaeosphaeria	s__Phaeosphaeria_thysanolaenicola 4	226895162 -
k__Bacteria.p__Actinobacteriota.c__Actinobacteria.o__Streptosporangiales.f__Streptosporangiaceae	3.19606			-		k__Fungi	p__Basidiomycota	c__Agaricomycetes	o__Agaricales	f__Tricholomataceae	g__Delicatula 4	52377072697 -
k__Bacteria.p__Chloroflexi.c__Gitt_GS_136.o__Gitt_GS_136.f__Gitt_GS_136	2.93642			-		k__Fungi	p__Ascomycota	c__Sordariomycetes	o__Sordariales	f__Lasiosphaeriaceae	g__Schizothecium 2	84365190535 -
k__Bacteria.p__Proteobacteria.c__Gammaproteobacteria.o__Coxiellales	2.32344			-		k__Fungi	p__Ascomycota	c__Dothideomycetes	o__Pleosporales	f__Didymosphaeriaceae	g__Pseudopithomyces	s__Pseudopithomyces_palmicola 2	62308237457 -
k__Bacteria.p__Proteobacteria.c__Gammaproteobacteria.o__JG36_TzT_191.f__JG36_TzT_191	3.3575			0.0109578		k__Fungi	p__Ascomycota	c__Pezizomycetes 2	72507191311 0	250336722347
k__Bacteria.p__Chloroflexi.c__Chloroflexia.o__Chloroflexales.f__Roseiflexaceae	3.1137			0.0496		k__Fungi	p__Ascomycota	c__Sordariomycetes	o__Sordariales	f__Chaetomiaceae	g__Thielavia	s__Thielavia_terrestris 3	55474959425 -
k__Bacteria.p__Chloroflexi.c__Ktedonobacteria.o__Ktedonobacterales.f__Ktedonobacteraceae.g__1959_1	3.59752			-		k__Fungi	p__Ascomycota	c__Eurotiomycetes	o__Eurotiales	f__Aspergillaceae	g__Aspergillus	s__Aspergillus_flavipes 2	76829706715 0	366532065231
k__Bacteria.p__Firmicutes.c__Bacilli.o__Alicyclobacillales.f__Alicyclobacillaceae.g__Tumebacillus	3.06177			0.026342		k__Fungi	p__Basidiomycota	c__Agaricomycetes	o__Polyporales	f__Meruliaceae 2	82399721735 0	407234956518
k__Bacteria.p__Chloroflexi.c__Ktedonobacteria.o__B10_SB3A.f__B10_SB3A	2.64599			-		k__Fungi	p__Ascomycota	c__Dothideomycetes	o__Pleosporales	f__Phaeosphaeriaceae	g__Paraphoma	s__Paraphoma_chrysanthemicola 3	28611779941 -
k__Bacteria.p__Proteobacteria.c__Alphaproteobacteria.o__Rhodospirillales.f__Rhodospirillaceae	2.68931			0.0346773		k__Fungi	p__Ascomycota	c__Eurotiomycetes	o__Eurotiales	f__Aspergillaceae	g__Penicillium	s__Penicillium_parvum 3	43599573121 0	369159169946
k__Bacteria.p__Verrucomicrobiota.c__Verrucomicrobiae.o__Pedosphaerales	4.16143			0.0184735		k__Fungi	p__Basidiomycota	c__Tremellomycetes	o__Tremellales	f__Trimorphomycetaceae 3	54262190968 -
k__Bacteria.p__Planctomycetota.c__BD7_11	3.10157			-		k__Fungi	p__Ascomycota	c__Dothideomycetes	o__Venturiales	f__Sympoventuriaceae 2	91767826023 -
k__Archaea.p__Thermoplasmatota.c__Thermoplasmata	3.68451			0.0281067		k__Fungi	p__Ascomycota	c__Dothideomycetes	o__Mycosphaerellales	f__Mycosphaerellaceae 2	98647311427 -
k__Bacteria.p__Actinobacteriota.c__Actinobacteria.o__Frankiales.f__Sporichthyaceae.g__Sporichthya	3.11129			0.0252201		k__Fungi	p__Ascomycota	c__Eurotiomycetes	o__Eurotiales	f__Trichocomaceae	g__Talaromyces	s__Talaromyces_radicus 3	76138507274 0	265669378946
k__Bacteria.p__Chloroflexi.c__P2_11E.o__P2_11E.f__P2_11E.g__P2_11E	3.45129			0.046937		k__Fungi	p__Ascomycota	c__Eurotiomycetes	o__Eurotiales	f__Aspergillaceae	g__Aspergillus	s__Aspergillus_neoniveus 4	29341010048 0	274043669257
k__Bacteria.p__Proteobacteria.c__Gammaproteobacteria.o__Burkholderiales.f__SC_I_84.g__SC_I_84	3.96049			0.0097633		k__Fungi	p__Mucoromycota 5	01802308233 A 4	7193017671 0	361756850526
k__Bacteria.p__Verrucomicrobiota.c__Verrucomicrobiae.o__Chthoniobacterales.f__Terrimicrobiaceae	2.97748			0.031158		k__Fungi	p__Ascomycota	c__Dothideomycetes	o__Pleosporales	f__Trematosphaeriaceae	g__Trematosphaeria 3	54185256585 -
k__Bacteria.p__Gemmatimonadota	4.65439			-		k__Fungi	p__Ascomycota	c__Eurotiomycetes	o__Eurotiales	f__Aspergillaceae	g__Penicillium 5	13860558805 E 4	77893251405 0	450546398852
k__Bacteria.p__Actinobacteriota.c__Thermoleophilia.o__Solirubrobacterales.f__Solirubrobacteraceae.g__Solirubrobacter	3.21154			0.0250421		k__Fungi	p__Basidiomycota	c__Agaricomycetes	o__Agaricales	f__Agaricaceae	g__Leucoagaricus 4	64905050368 -
k__Bacteria.p__Dadabacteria.c__Dadabacteriia	3.32635			0.0142741		k__Fungi	p__Ascomycota	c__Pezizomycetes	o__Pezizales	f__Pezizaceae	g__Terfezia 2	69905848074 -
k__Bacteria.p__Proteobacteria.c__Alphaproteobacteria.o__Rhizobiales.f__Xanthobacteraceae.g__Pseudolabrys.s__Pseudolabrys_taiwanensis	3.1568			-		k__Fungi	p__Basidiomycota	c__Atractiellomycetes	o__Atractiellales 4	1318100851 0	289775034078
k__Bacteria.p__SAR324_cladeMarine_group_B.c__SAR324_cladeMarine_group_B	2.59398			-		k__Fungi	p__Basidiomycota	c__Atractiellomycetes	o__Atractiellales	f__Hoehnelomycetaceae	g__Atractiella 4	1318100851 0	289775034078
k__Bacteria.p__Actinobacteriota.c__Actinobacteria.o__Frankiales.f__Geodermatophilaceae.g__Blastococcus	2.71992			-		k__Fungi	p__Glomeromycota	c__Glomeromycetes	o__Diversisporales	f__Gigasporaceae	g__Racocetra 3	53014580631 -
k__Bacteria.p__Proteobacteria.c__Alphaproteobacteria.o__Rhizobiales.f__Rhizobiaceae.g__Mesorhizobium	2.86645			-		k__Fungi	p__Ascomycota	c__Saccharomycetes	o__Saccharomycetales 3	09806949978 -
k__Bacteria.p__Myxococcota.c__Polyangia.o__Polyangiales.f__Polyangiaceae	3.80372			0.023599		k__Fungi	p__Basidiomycota	c__Agaricomycetes	o__Corticiales	f__Corticiaceae 2	8474783132 -
k__Bacteria.p__Bacteroidota.c__Bacteroidia.o__Chitinophagales.f__Chitinophagaceae.g__Puia	3.95116			0.0235346		k__Fungi	p__Basidiomycota	c__Cystobasidiomycetes 2	53093615136 0	4537085474
k__Bacteria.p__Actinobacteriota.c__Actinobacteria.o__Streptosporangiales.f__Streptosporangiaceae.g__Thermocatellispora	2.85364			-		k__Fungi	p__Ascomycota	c__Sordariomycetes	o__Sordariales	f__Lasiosphaeriaceae	g__Echria 2	71999238758 -
k__Bacteria.p__Actinobacteriota.c__Actinobacteria.o__Propionibacteriales.f__Nocardioidaceae.g__Nocardioides	3.22928			0.0192033		k__Fungi	p__Ascomycota	c__Sordariomycetes	o__Sordariales	f__Chaetomiaceae	g__Humicola 3	1408214802 0	366532065231
k__Bacteria.p__Patescibacteria.c__Saccharimonadia.o__Saccharimonadales.f__S32.g__TM7	2.80545			0.0464634		k__Fungi	p__Mortierellomycota	c__Mortierellomycetes	o__Mortierellales	f__Mortierellaceae	g__Mortierella 3	32964956066 -
k__Bacteria.p__Cyanobacteria.c__Cyanobacteriia	5.3542	XGJ	5.04203	0.0268984		k__Fungi	p__Ascomycota	c__Sordariomycetes	o__Hypocreales	f__Stachybotryaceae 3	33834816725 0	255766093902
k__Bacteria.p__Armatimonadota.c__Fimbriimonadia.o__Fimbriimonadales.f__Fimbriimonadaceae.g__Fimbriimonadaceae	3.0135			-		k__Fungi	p__Basidiomycota	c__Agaricomycetes	o__Cantharellales	f__Ceratobasidiaceae	g__Thanatephorus	s__Thanatephorus_cucumeris 3	55474959425 -
k__Bacteria.p__Actinobacteriota.c__Acidimicrobiia.o__IMCC26256.f__IMCC26256.g__IMCC26256.s__actinobacterium_YJF2_33	2.8536			-		k__Fungi	p__Ascomycota	c__Eurotiomycetes	o__Chaetothyriales 5	04961755544 B 4	65594615867 0	1712492929
k__Bacteria.p__Elusimicrobiota.c__Lineage_IIa.o__Lineage_IIa	3.14363			0.042659		k__Fungi	p__Ascomycota	c__Sordariomycetes	o__Magnaporthales	f__Magnaporthaceae	g__Pseudophialophora	s__Pseudophialophora_eragrostis 3	33588057833 -
k__Bacteria.p__Acidobacteriota.c__Blastocatellia	3.34006			0.0381985		k__Fungi	p__Basidiomycota	c__Agaricomycetes	o__Agaricales	f__Entolomataceae	g__Clitopilus 3	39154635755 -
k__Bacteria.p__Proteobacteria.c__Gammaproteobacteria.o__Salinisphaerales.f__Solimonadaceae.g__Nevskia.s__Nevskia_terrae	2.90294			0.0143766		k__Fungi	p__Basidiomycota	c__Agaricomycetes	o__Geastrales	f__Sphaerobolaceae	g__Sphaerobolus	s__Sphaerobolus_ingoldii 4	97127266316 -
k__Bacteria.p__Firmicutes.c__Bacilli.o__Brevibacillales	3.43906			0.0084089		k__Fungi	p__Basidiomycota	c__Agaricomycetes	o__Agaricales	f__Omphalotaceae 4	30790134416 -
k__Bacteria.p__Chloroflexi.c__AD3.o__AD3	5.46107	LCK	5.15424	0.007787		k__Fungi	p__Basidiomycota	c__Agaricomycetes	o__Geastrales	f__Sphaerobolaceae	g__Sphaerobolus 4	97127266316 -
k__Bacteria.p__Chloroflexi.c__Dehalococcoidia.o__S085	2.45022			0.014913		k__Fungi	p__Basidiomycota	c__Agaricomycetes	o__Corticiales	f__Corticiaceae	g__Laetisaria 2	83196614702 -
k__Bacteria.p__Verrucomicrobiota.c__Chlamydiae.o__Chlamydiales.f__Simkaniaceae.g__Ga0074140	2.76209			0.00920271		k__Fungi	p__Ascomycota	c__Dothideomycetes	o__Pleosporales	f__Pleosporaceae	g__Curvularia	s__Curvularia_eragrostidis 3	77239206903 -
k__Bacteria.p__Patescibacteria.c__Saccharimonadia.o__Saccharimonadales.f__S32	2.80545			0.0464634		k__Fungi	p__Basidiomycota	c__Agaricomycetes	o__Agaricales	f__Pleurotaceae 2	7448159713 -
k__Bacteria.p__Myxococcota.c__Polyangia.o__Polyangiales.f__Polyangiaceae.g__Pajaroellobacter	3.79462			0.0179562		k__Fungi	p__Entorrhizomycota	c__Entorrhizomycetes	o__Entorrhizales	f__Entorrhizaceae 2	51484933146 -
k__Bacteria.p__Acidobacteriota	5.32326			-		k__Fungi	p__Ascomycota	c__Dothideomycetes	o__Dothideales 3	47810242308 0	411294158528
k__Bacteria.p__Firmicutes.c__Bacilli.o__Entomoplasmatales	3.4502			0.014987		k__Fungi	p__Ascomycota	c__Eurotiomycetes	o__Eurotiales	f__Trichocomaceae	g__Talaromyces	s__Talaromyces_viridulus 3	98286207443 0	366532065231
k__Bacteria.p__Patescibacteria.c__Parcubacteria	3.6987			-		k__Fungi	p__Ascomycota	c__Sordariomycetes	o__Hypocreales	f__Cordycipitaceae	g__Simplicillium 3	86575531648 -
k__Bacteria.p__Armatimonadota.c__Chthonomonadetes	3.65362			0.0295208		k__Fungi	p__Basidiomycota	c__Agaricomycetes	o__Polyporales 3	5658197216 0	27126814084
k__Bacteria.p__Proteobacteria.c__Gammaproteobacteria.o__Xanthomonadales.f__Rhodanobacteraceae.g__Rudaea	3.19009			0.0409707		k__Fungi	p__Mucoromycota	c__Umbelopsidomycetes 3	30379106193 -
k__Bacteria.p__Actinobacteriota.c__Actinobacteria.o__Corynebacteriales	4.53552	LGJ	4.16716	0.0274044		k__Fungi	p__Basidiomycota	c__Agaricomycetes	o__Agaricales	f__Lycoperdaceae	g__Lycoperdon 3	24541832187 -
k__Bacteria.p__Verrucomicrobiota.c__Verrucomicrobiae.o__Pedosphaerales.f__Pedosphaeraceae	4.16143			0.0184735		k__Fungi	p__Basidiomycota	c__Agaricomycetes	o__Agaricales	f__Psathyrellaceae	g__Coprinellus 2	9519414641 -
k__Bacteria.p__Planctomycetota.c__Pla4_lineage.o__Pla4_lineage.f__Pla4_lineage.g__Pla4_lineage	2.95741			-		k__Fungi	p__Basidiomycota	c__Cystobasidiomycetes	o__Erythrobasidiales 2	4895434662 -
k__Bacteria.p__Acidobacteriota.c__Vicinamibacteria.o__Vicinamibacterales.f__Vicinamibacteraceae	3.52434			-		k__Fungi	p__Ascomycota	c__Sordariomycetes	o__Diaporthales 3	33464150621 -
k__Bacteria.p__Acidobacteriota.c__Acidobacteriae.o__Acidobacteriales.f__Acidobacteriaceae_Subgroup_1	4.47893			-		k__Fungi	p__Ascomycota	c__Saccharomycetes	o__Saccharomycetales	f__Lipomycetaceae	g__Lipomyces 3	02610190877 -
k__Bacteria.p__Firmicutes.c__Bacilli.o__Paenibacillales.f__Paenibacillaceae.g__Cohnella	2.89102			-		k__Fungi	p__Ascomycota	c__Dothideomycetes	o__Pleosporales	f__Didymosphaeriaceae	g__Tremateia	s__Tremateia_chromolaenae 2	94286180625 0	496241001878
k__Bacteria.p__Proteobacteria.c__Gammaproteobacteria.o__KF_JG30_C25.f__KF_JG30_C25.g__KF_JG30_C25	3.55989			0.0134845		k__Fungi	p__Glomeromycota	c__Glomeromycetes	o__Glomerales	f__Glomeraceae 3	31820336273 -
k__Bacteria.p__Acidobacteriota.c__Vicinamibacteria	4.02418			0.0475772		k__Fungi	p__Basidiomycota	c__Agaricomycetes	o__Agaricales	f__Tricholomataceae	g__Delicatula	s__Delicatula_integrella 4	52377072697 -
k__Bacteria.p__Actinobacteriota.c__Actinobacteria.o__Micrococcales.f__Intrasporangiaceae	2.58602			0.0474366		k__Fungi	p__Ascomycota	c__Dothideomycetes	o__Venturiales	f__Venturiaceae	g__Venturia 4	43471651237 A 4	10308555151 0	429725413987
k__Bacteria.p__Proteobacteria.c__Gammaproteobacteria.o__Xanthomonadales.f__Rhodanobacteraceae	3.70181			0.0368157		k__Fungi	p__Basidiomycota	c__Tremellomycetes	o__Tremellales	f__Trimorphomycetaceae	g__Saitozyma 3	54262190968 -
k__Bacteria.p__MBNT15.c__MBNT15	2.78305			-		k__Fungi	p__Basidiomycota	c__Agaricomycetes	o__Polyporales	f__Polyporaceae 2	96375973028 -
k__Bacteria.p__Proteobacteria.c__Gammaproteobacteria.o__JG36_TzT_191	3.3575			0.0109578		k__Fungi	p__Basidiomycota	c__Agaricomycetes	o__Cantharellales	f__Botryobasidiaceae 2	9973993379 -
k__Bacteria.p__Actinobacteriota.c__Thermoleophilia.o__Solirubrobacterales.f__67_14.g__67_14.s__bacterium_enrichment	2.8336			-		k__Fungi	p__Ascomycota	c__Sordariomycetes	o__Coniochaetales	f__Coniochaetaceae 2	98647311427 0	473374919272
k__Bacteria.p__Acidobacteriota.c__Acidobacteriae.o__Subgroup_2.f__Subgroup_2.g__Subgroup_2.s__bacterium_Ellin7509	4.33868	LCK	4.05807	0.0189358		k__Fungi	p__Ascomycota	c__Sordariomycetes	o__Ophiostomatales	f__Ophiostomataceae	g__Phialocephala	s__Phialocephala_humicola 2	91442510283 -
k__Bacteria.p__Nitrospirota.c__Nitrospiria.o__Nitrospirales	3.91449			-		k__Fungi	p__Ascomycota	c__Dothideomycetes	o__Muyocopronales	f__Muyocopronaceae	g__Muyocopron 3	59675343585 -
k__Bacteria.p__Planctomycetota.c__Planctomycetes	4.90363	LCK	4.29362	0.0295208		k__Fungi	p__Ascomycota	c__Eurotiomycetes	o__Eurotiales	f__Aspergillaceae	g__Penicillium	s__Penicillium_javanicum 2	62308237457 -
k__Bacteria.p__Actinobacteriota.c__Actinobacteria.o__Streptomycetales.f__Streptomycetaceae	4.34833			0.0345482		k__Fungi	p__Basidiomycota	c__Agaricomycetes	o__Geastrales	f__Geastraceae	g__Geastrum 4	21659647755 0	255258995237
k__Bacteria.p__Proteobacteria.c__Alphaproteobacteria.o__Rhizobiales.f__Rhizobiales_Incertae_Sedis.g__Nordella.s__Nordella_oligomobilis	2.89895			0.048385		k__Fungi	p__Ascomycota	c__Eurotiomycetes	o__Eurotiales	f__Aspergillaceae	g__Aspergillus	s__Aspergillus_keveii 2	91442510283 0	131763574395
k__Bacteria.p__Actinobacteriota.c__Actinobacteria.o__Kineosporiales	3.10769			0.0298147		k__Fungi	p__Basidiomycota	c__Tremellomycetes 3	74577999941 0	164867515786
k__Bacteria	5.99986	XGJ	5.01868	0.0259131		k__Fungi	p__Calcarisporiellomycota 4	46763263926 G 4	17673716504 0	107179499113
k__Bacteria.p__Chloroflexi.c__Ktedonobacteria.o__Ktedonobacterales.f__Ktedonobacteraceae.g__FCPS473	3.91316			-		k__Fungi	p__Ascomycota	c__Dothideomycetes	o__Pleosporales	f__Latoruaceae	g__Matsushimamyces	s__Matsushimamyces_venustum 4	12321387225 -
k__Bacteria.p__Acidobacteriota.c__Acidobacteriae.o__Subgroup_2	4.44148	XCK	4.08569	0.0458811		k__Fungi	p__Ascomycota	c__Sordariomycetes	o__Diaporthales	f__Diaporthaceae	g__Diaporthe 3	32586758191 -
k__Bacteria.p__Bacteroidota.c__Bacteroidia.o__Sphingobacteriales.f__CWT_CU03_E12.g__CWT_CU03_E12	2.79819			0.0380022		k__Fungi	p__Ascomycota	c__Sordariomycetes	o__Togniniales	f__Togniniaceae	g__Phaeoacremonium 3	78091231665 0	383833506899
k__Bacteria.p__Chloroflexi.c__Ktedonobacteria.o__C0119.f__C0119.g__C0119	2.72868			0.0193895		k__Fungi	p__Ascomycota	c__Dothideomycetes	o__Venturiales	f__Sympoventuriaceae	g__Scolecobasidium 2	91114739307 -
k__Bacteria.p__Proteobacteria.c__Gammaproteobacteria.o__Burkholderiales.f__SC_I_84	3.96049			0.0097633		k__Fungi	p__Entorrhizomycota	c__Entorrhizomycetes	o__Entorrhizales	f__Entorrhizaceae	g__Entorrhiza 2	51484933146 -
k__Archaea.p__Crenarchaeota.c__Bathyarchaeia.o__Bathyarchaeia.f__Bathyarchaeia	3.86979			-		k__Fungi	p__Basidiomycota	c__Agaricomycetes	o__Agaricales	f__Omphalotaceae	g__Marasmiellus 3	60415445043 -
k__Bacteria.p__Actinobacteriota.c__Thermoleophilia.o__Solirubrobacterales.f__Solirubrobacteraceae.g__Conexibacter	4.48199			-		k__Fungi	p__Ascomycota	c__Sordariomycetes	o__Sordariales	f__Chaetomiaceae	g__Parathielavia 2	79489483565 -
k__Bacteria.p__Gemmatimonadota.c__Gemmatimonadetes	4.65432			-		k__Fungi	p__Ascomycota	c__Dothideomycetes	o__Dothideales	f__Saccotheciaceae	g__Aureobasidium	s__Aureobasidium_leucospermi 2	96666472092 -
k__Bacteria.p__Bacteroidota.c__Bacteroidia.o__Flavobacteriales.f__Weeksellaceae.g__Elizabethkingia	3.68076			-		k__Fungi	p__Basidiomycota	c__Agaricomycetes	o__Agaricales	f__Entolomataceae 3	39371783448 -
k__Bacteria.p__Proteobacteria.c__Alphaproteobacteria.o__Rhizobiales.f__Labraceae.g__Labrys	3.00895			0.0124742		k__Fungi	p__Ascomycota	c__Sordariomycetes	o__Sordariales 5	07233383406 -
k__Bacteria.p__Elusimicrobiota.c__Lineage_IIa.o__Lineage_IIa.f__Lineage_IIa	3.14363			0.042659		k__Fungi	p__Ascomycota	c__Eurotiomycetes	o__Chaetothyriales	f__Chaetothyriaceae 4	91800223972 B 4	53263190749 0	289775034078
k__Bacteria.p__Acidobacteriota.c__Subgroup_5.o__Subgroup_5.f__Subgroup_5	3.27359			0.0291948		k__Fungi	p__Mucoromycota	c__Mucoromycetes	o__Mucorales	f__Cunninghamellaceae	g__Cunninghamella 3	34808066377 -
k__Bacteria.p__Actinobacteriota.c__Actinobacteria.o__Streptomycetales.f__Streptomycetaceae.g__Kitasatospora	3.7082			0.0276145		k__Fungi	p__Ascomycota	c__Pezizomycetes	o__Pezizales	f__Pezizaceae 2	69905848074 -
k__Bacteria.p__Planctomycetota.c__Planctomycetes.o__Pirellulales.f__Pirellulaceae.g__Pirellula	2.79324			0.0341889		k__Fungi	p__Basidiomycota	c__Ustilaginomycetes	o__Ustilaginales	f__Ustilaginaceae 3	17617973546 0	483849709202
k__Bacteria.p__Actinobacteriota.c__Actinobacteria.o__Micrococcales.f__Micrococcaceae.g__Sinomonas	2.89304			-		k__Fungi	p__Basidiomycota	c__Agaricomycetes	o__Trechisporales 4	68660337426 -
k__Bacteria.p__Actinobacteriota.c__Actinobacteria.o__Streptosporangiales.f__Thermomonosporaceae.g__Actinomadura	3.27449			-		k__Fungi	p__Basidiomycota	c__Agaricomycetes	o__Russulales 2	88748347487 0	133284363124
k__Archaea.p__Crenarchaeota.c__Nitrososphaeria.o__Nitrosotaleales.f__Nitrosotaleaceae.g__Nitrosotaleaceae	3.60565			0.00991452		k__Fungi	p__Ascomycota	c__Dothideomycetes	o__Pleosporales	f__Didymosphaeriaceae 4	23633329835 0	354805619476
k__Bacteria.p__Acidobacteriota.c__Holophagae.o__Subgroup_7	4.033			0.0198554		k__Fungi	p__Basidiomycota	c__Agaricomycetes	o__Corticiales	f__Corticiaceae	g__Laetisaria	s__Laetisaria_arvalis 2	83196614702 -
k__Bacteria.p__Firmicutes.c__Bacilli.o__Paenibacillales.f__Paenibacillaceae	4.34404	LCK	4.04016	0.0118004		k__Fungi	p__Ascomycota	c__Sordariomycetes	o__Sordariales	f__Chaetomiaceae	g__Parathielavia	s__Parathielavia_kuwaitensis 2	79489483565 -
k__Archaea.p__Crenarchaeota.c__Nitrososphaeria.o__Group_1_1c.f__Group_1_1c	3.53533			0.0289237		k__Fungi	p__Basidiomycota	c__Agaricomycetes	o__Geastrales	f__Geastraceae	g__Nidulariopsis	s__Nidulariopsis_iowensis 4	14869874714 -
k__Bacteria.p__Actinobacteriota.c__Actinobacteria.o__Micrococcales.f__Microbacteriaceae	3.54071			0.0336503		k__Fungi	p__Ascomycota	c__Dothideomycetes	o__Cladosporiales	f__Cladosporiaceae	g__Cladosporium 3	83275505638 -
k__Bacteria.p__Chloroflexi.c__AD3	5.46107	LCK	5.14759	0.007787		k__Fungi	p__Entorrhizomycota 2	51484933146 -
k__Bacteria.p__Cyanobacteria.c__Sericytochromatia.o__Sericytochromatia.f__Sericytochromatia	2.63175			-		k__Fungi	p__Ascomycota	c__Sordariomycetes	o__Diaporthales	f__Diaporthaceae 3	33464150621 -
k__Bacteria.p__Proteobacteria.c__Alphaproteobacteria.o__Rhizobiales.f__Rhizobiales_Incertae_Sedis.g__Bauldia	3.14254			0.0227299		k__Fungi	p__Ascomycota	c__Sordariomycetes	o__Hypocreales	f__Clavicipitaceae	g__Ustilaginoidea 2	96955040916 -
k__Bacteria.p__Patescibacteria.c__Saccharimonadia.o__Saccharimonadales.f__WWH38	3.77643			0.00932112		k__Fungi	p__Basidiomycota	c__Agaricomycetes	o__Agaricales	f__Agaricaceae	g__Leucocoprinus 2	97526489268 -
k__Bacteria.p__Proteobacteria.c__Gammaproteobacteria.o__Steroidobacterales.f__Steroidobacteraceae.g__Steroidobacter	3.27027			-		k__Fungi	p__Ascomycota	c__Sordariomycetes	o__Coniochaetales	f__Coniochaetaceae	g__Coniochaeta	s__Coniochaeta_fasciculata 2	73505613401 -
k__Bacteria.p__Planctomycetota.c__Planctomycetes.o__Planctomycetales	3.86907			0.0177869		k__Fungi	p__Ascomycota	c__Dothideomycetes	o__Pleosporales	f__Didymosphaeriaceae	g__Pseudopithomyces 2	62308237457 -
k__Bacteria.p__Actinobacteriota.c__Actinobacteria.o__Frankiales.f__Frankiaceae.g__Frankia	3.00906			0.0167884		k__Fungi	p__Basidiomycota	c__Agaricomycetes	o__Agaricales	f__Lycoperdaceae	g__Lycoperdon	s__Lycoperdon_pratense 3	24541832187 -
k__Bacteria.p__Proteobacteria.c__Gammaproteobacteria.o__Burkholderiales.f__Burkholderiaceae.g__Burkholderia_Caballeronia_Paraburkholderia.s__Caballeronia_zhejiangensis	3.06714			0.0142741		k__Fungi	p__Glomeromycota 3	6725284332 -
k__Bacteria.p__Bacteroidota.c__Bacteroidia.o__Chitinophagales.f__Chitinophagaceae.g__Flavisolibacter	3.07374			-		k__Fungi	p__Basidiomycota	c__Malasseziomycetes	o__Malasseziales	f__Malasseziaceae	g__Malassezia	s__Malassezia_globosa 2	8279999598 0	91344828335
k__Bacteria.p__Proteobacteria.c__Alphaproteobacteria.o__Micropepsales	4.19424			0.0323864		k__Fungi	p__Glomeromycota	c__Glomeromycetes	o__Diversisporales	f__Diversisporales_fam_Incertae_sedis 2	73505613401 -
k__Bacteria.p__Proteobacteria.c__Gammaproteobacteria.o__Legionellales.f__Legionellaceae.g__Legionella	2.81504			-		k__Fungi	p__Basidiomycota	c__Agaricomycetes	o__Agaricales 5	05281091161 F 4	73626357637 0	458811009455
k__Bacteria.p__Planctomycetota.c__Phycisphaerae.o__Tepidisphaerales.f__CPla_3_termite_group.g__CPla_3_termite_group	3.2019			-		k__Fungi	p__Ascomycota	c__Dothideomycetes	o__Pleosporales	f__Didymosphaeriaceae	g__Paraconiothyrium 4	23101022797 -
k__Bacteria.p__Verrucomicrobiota.c__Verrucomicrobiae.o__Verrucomicrobiales	2.82675			0.0281878		k__Fungi	p__Ascomycota	c__Dothideomycetes	o__Pleosporales	f__Didymosphaeriaceae	g__Paraconiothyrium	s__Paraconiothyrium_archidendri 4	21052921035 -
k__Bacteria.p__Cyanobacteria.c__Sericytochromatia.o__Sericytochromatia.f__Sericytochromatia.g__Sericytochromatia	2.63175			-		k__Fungi	p__Ascomycota	c__Eurotiomycetes	o__Eurotiales	f__Aspergillaceae	g__Penicillium	s__Penicillium_amphipolaria 4	25056871791 -
k__Bacteria.p__Bdellovibrionota.c__Oligoflexia.o__0319_6G20.f__0319_6G20	3.19701			-		k__Fungi	p__Basidiomycota	c__Agaricomycetes	o__Agaricales	f__Omphalotaceae	g__Marasmiellus	s__Marasmiellus_tricolor 3	59607432002 -
k__Bacteria.p__Proteobacteria.c__Gammaproteobacteria.o__Burkholderiales.f__Burkholderiaceae.g__Cupriavidus	2.71397			0.0123212		k__Fungi	p__Basidiomycota	c__Ustilaginomycetes 3	17617973546 0	483849709202
k__Bacteria.p__Actinobacteriota.c__Actinobacteria.o__Catenulisporales	3.70761			-		k__Fungi	p__Basidiomycota	c__Ustilaginomycetes	o__Ustilaginales	f__Ustilaginaceae	g__Pseudozyma 2	99469344452 0	262385626803
k__Bacteria.p__Actinobacteriota.c__Actinobacteria.o__Catenulisporales.f__Catenulisporaceae	3.11962			0.0314543		k__Fungi	p__Chytridiomycota	c__Rhizophlyctidomycetes	o__Rhizophlyctidales	f__Rhizophlyctidaceae	g__Rhizophlyctis 3	81873788129 -
k__Bacteria.p__Proteobacteria.c__Alphaproteobacteria.o__Reyranellales.f__Reyranellaceae.g__Reyranella	3.88885			0.0239817		k__Fungi	p__Ascomycota	c__Eurotiomycetes	o__Eurotiales	f__Aspergillaceae	g__Aspergillus	s__Aspergillus_brasiliensis 3	91670486913 -
k__Bacteria.p__Proteobacteria.c__Gammaproteobacteria.o__Coxiellales.f__Coxiellaceae.g__Coxiella	2.32344			-		k__Fungi	p__Ascomycota	c__Dothideomycetes	o__Pleosporales	f__Pleosporales_fam_Incertae_sedis	g__Pseudochaetosphaeronema 2	63567150188 -
k__Bacteria.p__Chloroflexi.c__Anaerolineae.o__SBR1031	2.70489			-		k__Fungi	p__Basidiomycota	c__Malasseziomycetes	o__Malasseziales	f__Malasseziaceae	g__Malassezia	s__Malassezia_restricta 3	34445648851 0	124105918062
k__Bacteria.p__Actinobacteriota.c__Actinobacteria.o__Pseudonocardiales.f__Pseudonocardiaceae.g__Crossiella	4.44131	LGJ	4.0925	0.0368469		k__Fungi	p__Ascomycota	c__Sordariomycetes	o__Sordariales	f__Sordariales_fam_Incertae_sedis	g__Conlarium	s__Conlarium_aquaticum 2	67706418704 -
k__Bacteria.p__Actinobacteriota.c__Thermoleophilia.o__Solirubrobacterales.f__67_14.g__67_14	3.9755			0.0169349		k__Fungi	p__Ascomycota	c__Sordariomycetes	o__Hypocreales	f__Hypocreaceae	g__Trichoderma	s__Trichoderma_rifaii 2	83196614702 -
k__Bacteria.p__Verrucomicrobiota.c__Chlamydiae	4.22208			0.00927268		k__Fungi	p__Ascomycota	c__Leotiomycetes	o__Helotiales	f__Hyaloscyphaceae 2	91767826023 -
k__Bacteria.p__Planctomycetota.c__Phycisphaerae.o__Phycisphaerales.f__Phycisphaeraceae	3.03974			0.0277802		k__Fungi	p__Glomeromycota	c__Glomeromycetes	o__Diversisporales	f__Gigasporaceae 3	53014580631 -
k__Bacteria.p__Armatimonadota.c__Chthonomonadetes.o__Chthonomonadales.f__Chthonomonadaceae.g__Chthonomonas	3.35329			-		k__Fungi	p__Basidiomycota	c__Agaricomycetes	o__Russulales	f__Peniophoraceae 2	84365190535 0	133284363124
k__Bacteria.p__Verrucomicrobiota.c__Verrucomicrobiae.o__Chthoniobacterales.f__Chthoniobacteraceae.g__Chthoniobacter.s__bacterium_Ellin507	2.59398			0.0138087		k__Fungi	p__Ascomycota	c__Dothideomycetes	o__Natipusillales 5	25658053464 -
k__Bacteria.p__Chloroflexi.c__Ktedonobacteria.o__B12_WMSP1	3.62702			-		k__Fungi	p__Ascomycota	c__Dothideomycetes	o__Muyocopronales 3	60147774253 -
k__Bacteria.p__Planctomycetota.c__Phycisphaerae.o__Tepidisphaerales	4.59135	LGJ	4.24452	0.0193677		k__Fungi	p__Basidiomycota	c__Agaricomycetes	o__Cantharellales	f__Ceratobasidiaceae 4	82307134472 -
k__Bacteria.p__Desulfobacterota	3.08797			0.0470022		k__Fungi	p__Ascomycota	c__Sordariomycetes	o__Hypocreales	f__Clavicipitaceae	g__Metarhizium	s__Metarhizium_robertsii 2	96955040916 -
k__Bacteria.p__Proteobacteria.c__Alphaproteobacteria.o__Caulobacterales.f__Caulobacteraceae.g__Phenylobacterium	3.69402			0.0151885		k__Fungi	p__Ascomycota	c__Sordariomycetes	o__Hypocreales	f__Clavicipitaceae	g__Ustilaginoidea	s__Ustilaginoidea_virens 2	96955040916 -
k__Bacteria.p__Bacteroidota.c__Kapabacteria.o__Kapabacteriales.f__Kapabacteriales	2.76752			0.0293889		k__Fungi	p__Basidiomycota	c__Agaricomycetes	o__Cantharellales	f__Ceratobasidiaceae	g__Thanatephorus 3	55474959425 -
k__Bacteria.p__Bdellovibrionota.c__Oligoflexia	3.19701			-		k__Fungi	p__Ascomycota	c__Sordariomycetes	o__Xylariales	f__Apiosporaceae 2	65980518159 -
k__Bacteria.p__Firmicutes.c__Bacilli.o__Paenibacillales.f__Paenibacillaceae.g__Ammoniphilus	3.22834			-		k__Fungi	p__Ascomycota	c__Dothideomycetes	o__Pleosporales	f__Didymosphaeriaceae	g__Tremateia 2	94286180625 -
k__Bacteria.p__GAL15	4.34887	XCK	4.00448	0.00836778		k__Fungi	p__Ascomycota	c__Sordariomycetes	o__Sordariales	f__Chaetomiaceae	g__Achaetomium	s__Achaetomium_strumarium 3	00805740608 -
k__Bacteria.p__Actinobacteriota.c__Thermoleophilia	4.91482			-		k__Fungi	p__Ascomycota	c__Sordariomycetes	o__Hypocreales	f__Cordycipitaceae	g__Cordyceps	s__Cordyceps_fratricida 3	25744108222 0	192261407254
k__Bacteria.p__Patescibacteria.c__Parcubacteria.o__Candidatus_Kaiserbacteria.f__Candidatus_Kaiserbacteria.g__Candidatus_Kaiserbacteria	3.38058			-		k__Fungi	p__Ascomycota	c__Saccharomycetes	o__Saccharomycetales	f__Lipomycetaceae 3	02610190877 -
k__Bacteria.p__Armatimonadota.c__Fimbriimonadia	3.02242			-		k__Fungi	p__Ascomycota	c__Leotiomycetes	o__Thelebolales 3	00276106627 0	217094675423
k__Bacteria.p__Proteobacteria.c__Gammaproteobacteria.o__Burkholderiales.f__Oxalobacteraceae.g__Noviherbaspirillum	2.53487			-		k__Fungi	p__Ascomycota	c__Sordariomycetes	o__Sordariales	f__Chaetomiaceae	g__Arcopilus	s__Arcopilus_turgidopilosus 3	7001294911 0	381715549548
k__Bacteria.p__Actinobacteriota.c__Actinobacteria.o__Streptosporangiales.f__Streptosporangiales_Incertae_Sedis	2.64603			-		k__Fungi	p__Ascomycota	c__Dothideomycetes	o__Dothideales	f__Saccotheciaceae 3	47810242308 0	411294158528
k__Bacteria.p__Dependentiae.c__Babeliae.o__Babeliales.f__Vermiphilaceae	2.45032			-		k__Fungi	p__Ascomycota	c__Dothideomycetes	o__Botryosphaeriales	f__Botryosphaeriaceae 3	99442192561 -
k__Bacteria.p__Planctomycetota.c__Pla4_lineage.o__Pla4_lineage.f__Pla4_lineage	2.95741			-		k__Fungi	p__Ascomycota	c__Sordariomycetes	o__Xylariales 3	5285607882 -
k__Bacteria.p__Bacteroidota.c__Bacteroidia.o__Chitinophagales.f__Chitinophagaceae.g__Chitinophaga	2.80301			0.0438644		k__Fungi	p__Mucoromycota	c__Mucoromycetes	o__Mucorales	f__Rhizopodaceae 3	38275021926 -
k__Bacteria.p__Proteobacteria.c__Gammaproteobacteria.o__Pseudomonadales.f__Moraxellaceae.g__Acinetobacter.s__Acinetobacter_guillouiae	3.24276			-		k__Fungi	p__Basidiomycota	c__Malasseziomycetes 3	47181469924 0	133009483754
k__Bacteria.p__Chloroflexi.c__TK10	4.50964	LCK	4.15554	0.0295208		k__Fungi	p__Basidiomycota	c__Agaricomycetes	o__Agaricales	f__Agaricaceae	g__Leucoagaricus	s__Leucoagaricus_viridiflavus 3	96375973028 -
k__Archaea.p__Crenarchaeota.c__Nitrososphaeria.o__Nitrososphaerales.f__Nitrososphaeraceae.g__Candidatus_Nitrocosmicus	2.92548			0.0268462		k__Fungi	p__Ascomycota	c__Sordariomycetes	o__Hypocreales	f__Cordycipitaceae	g__Simplicillium	s__Simplicillium_obclavatum 3	86575531648 -
k__Bacteria.p__Firmicutes.c__Bacilli.o__Paenibacillales.f__Paenibacillaceae.g__Paenibacillus.s__Paenibacillus_lentimorbus	3.11724			0.0268462		k__Fungi	p__Mucoromycota	c__Mucoromycetes	o__Mucorales	f__Syncephalastraceae	g__Syncephalastrum 3	08942653827 0	351606534903
k__Bacteria.p__Proteobacteria.c__Alphaproteobacteria.o__Rhizobiales.f__KF_JG30_B3	2.92917			-		k__Fungi	p__Ascomycota	c__Sordariomycetes	o__Coniochaetales 2	98647311427 0	473374919272
k__Bacteria.p__FCPU426.c__FCPU426.o__FCPU426.f__FCPU426	2.84037			-		k__Fungi	p__Ascomycota	c__Eurotiomycetes	o__Eurotiales	f__Aspergillaceae	g__Aspergillus 4	85108243747 E 4	47540239878 0	454660945424
k__Bacteria.p__Verrucomicrobiota.c__Verrucomicrobiae.o__Chthoniobacterales.f__Chthoniobacteraceae.g__Chthoniobacter.s__bacterium_Ellin511	2.91632			-		k__Fungi	p__Ascomycota	c__Dothideomycetes	o__Pleosporales	f__Pleosporaceae	g__Curvularia	s__Curvularia_intermedia 3	42303075405 -
k__Bacteria.p__Actinobacteriota.c__Actinobacteria.o__Frankiales.f__Geodermatophilaceae.g__Modestobacter	2.78045			-		k__Fungi	p__Ascomycota	c__Sordariomycetes	o__Sordariales	f__Sordariales_fam_Incertae_sedis 3	25297145976 0	398078713512
k__Bacteria.p__Proteobacteria.c__Alphaproteobacteria.o__Acetobacterales	4.48595			-		k__Fungi	p__Basidiomycota	c__Agaricomycetes	o__Agaricales	f__Marasmiaceae 3	73653416544 -
k__Bacteria.p__Patescibacteria.c__Saccharimonadia.o__Saccharimonadales.f__LWQ8.g__LWQ8	3.77399			0.0201129		k__Fungi	p__Ascomycota	c__Eurotiomycetes	o__Eurotiales	f__Aspergillaceae	g__Penicillium	s__Penicillium_oxalicum 3	17259050444 -
k__Bacteria.p__Firmicutes.c__Bacilli.o__Erysipelotrichales.f__Erysipelotrichaceae	2.9086			0.0176038		k__Fungi	p__Ascomycota	c__Dothideomycetes	o__Muyocopronales	f__Muyocopronaceae 3	59675343585 -
k__Bacteria.p__Proteobacteria.c__Alphaproteobacteria.o__Rhizobiales.f__Beijerinckiaceae.g__Methylocapsa	3.23835			-		k__Fungi	p__Mucoromycota	c__Endogonomycetes	o__GS22 2	80341068657 -
k__Bacteria.p__Proteobacteria.c__Alphaproteobacteria.o__Elsterales.f__Elsteraceae	3.06179			0.0468457		k__Fungi	p__Basidiomycota	c__Malasseziomycetes	o__Malasseziales	f__Malasseziaceae 3	47181469924 0	133009483754
k__Bacteria.p__Proteobacteria.c__Alphaproteobacteria.o__Rhizobiales.f__Rhizobiaceae	3.69965			-		k__Fungi	p__Ascomycota	c__Sordariomycetes	o__Microascales 2	53876148887 -
k__Bacteria.p__Proteobacteria.c__Alphaproteobacteria.o__Rhizobiales.f__Xanthobacteraceae.g__Bradyrhizobium	3.98533			0.0188263		k__Fungi	p__Ascomycota 5	91804757756 B 5	29125889888 0	418875691233
k__Bacteria.p__Verrucomicrobiota.c__Verrucomicrobiae.o__Methylacidiphilales	2.74291			0.0129174		k__Fungi	p__Ascomycota	c__Eurotiomycetes	o__Chaetothyriales	f__Trichomeriaceae 4	27230265882 0	254335617589
k__Bacteria.p__Cyanobacteria.c__Vampirivibrionia.o__Obscuribacterales.f__Obscuribacteraceae.g__Obscuribacteraceae	3.29696			-		k__Fungi	p__Ascomycota	c__Sordariomycetes	o__Hypocreales	f__Hypocreales_fam_Incertae_sedis	g__Stilbella	s__Stilbella_byssiseda 2	65389632198 -
k__Bacteria.p__Planctomycetota.c__Pla4_lineage	2.95741			-		k__Fungi	p__Ascomycota	c__Eurotiomycetes	o__Eurotiales	f__Aspergillaceae	g__Aspergillus	s__Aspergillus_sojae 3	76092033809 -
k__Bacteria.p__Proteobacteria.c__Gammaproteobacteria.o__Burkholderiales.f__Burkholderiaceae.g__Burkholderia_Caballeronia_Paraburkholderia.s__Paraburkholderia_caribensis	3.59555			0.0257014		k__Fungi	p__Glomeromycota	c__Glomeromycetes	o__Glomerales 3	31820336273 -
k__Bacteria.p__Actinobacteriota.c__Actinobacteria.o__Streptosporangiales.f__Thermomonosporaceae.g__Actinoallomurus	3.3145			-		k__Fungi	p__Ascomycota	c__Sordariomycetes	o__Hypocreales	f__Hypocreales_fam_Incertae_sedis 2	96666472092 -
k__Bacteria.p__WPS_2.c__WPS_2	4.4431	LGJ	4.05124	0.0220984		k__Fungi	p__Mucoromycota	c__Mucoromycetes	o__Mucorales 5	00955511065 A 4	69798477616 0	378759532819
k__Bacteria.p__Proteobacteria.c__Alphaproteobacteria.o__Azospirillales.f__Inquilinaceae	2.96934			0.02684		k__Fungi	p__Ascomycota	c__Eurotiomycetes	o__Chaetothyriales	f__Herpotrichiellaceae 4	06287930627 0	17786891879
k__Bacteria.p__Firmicutes.c__Bacilli.o__Paenibacillales.f__Paenibacillaceae.g__Oxalophagus	3.37013			0.0414853		k__Fungi	p__Kickxellomycota 3	96288443039 -
k__Bacteria.p__Actinobacteriota.c__Acidimicrobiia.o__Microtrichales.f__Iamiaceae.g__Iamia	2.96757			0.0198049		k__Fungi	p__Ascomycota	c__Sordariomycetes	o__Hypocreales	f__Ophiocordycipitaceae	g__Purpureocillium 4	37772296012 -
k__Bacteria.p__GAL15.c__GAL15.o__GAL15.f__GAL15.g__GAL15	4.34887			0.00836778		k__Fungi	p__Ascomycota	c__Eurotiomycetes	o__Eurotiales	f__Trichocomaceae	g__Talaromyces 4	41091776162 H 4	10383655587 0	471477112566
k__Bacteria.p__Actinobacteriota.c__Actinobacteria.o__Catenulisporales.f__Actinospicaceae.g__Actinospica.s__bacterium_Ellin5012	3.14252			-		k__Fungi	p__Ascomycota	c__Dothideomycetes 5	35277112806 -
k__Bacteria.p__Proteobacteria.c__Gammaproteobacteria.o__Burkholderiales.f__Sutterellaceae	2.84708			-		k__Fungi	p__Ascomycota	c__Dothideomycetes	o__Cladosporiales	f__Cladosporiaceae 3	84017907446 -
k__Bacteria.p__Acidobacteriota.c__Acidobacteriae.o__Bryobacterales.f__Bryobacteraceae	4.8926	LGJ	4.50263	0.0289775		k__Fungi	p__Basidiomycota	c__Agaricomycetes	o__Agaricales	f__Pleurotaceae	g__Nematoctonus	s__Nematoctonus_pachysporus 2	7448159713 -
k__Bacteria.p__Proteobacteria.c__Gammaproteobacteria.o__Burkholderiales.f__A21b	3.08662			0.0270859		k__Fungi	p__Basidiomycota	c__Agaricomycetes	o__Geastrales	f__Sphaerobolaceae 4	97127266316 -
k__Bacteria.p__Chloroflexi.c__Ktedonobacteria.o__Ktedonobacterales.f__Ktedonobacterales	2.89696			-		k__Fungi	p__Basidiomycota	c__Agaricomycetes	o__Geastrales	f__Geastraceae	g__Geastrum	s__Geastrum_tenuipes 3	94621309562 0	41694505012
k__Bacteria.p__Proteobacteria.c__Alphaproteobacteria.o__Rhizobiales.f__Beijerinckiaceae.g__1174_901_12	2.9009			-		k__Fungi	p__Ascomycota	c__Dothideomycetes	o__Natipusillales	f__Natipusillaceae 5	25658053464 -
k__Bacteria.p__Actinobacteriota.c__Actinobacteria.o__Catenulisporales.f__Actinospicaceae.g__Actinospica	3.61791			-		k__Fungi	p__Ascomycota	c__Orbiliomycetes 2	79057346186 -
k__Bacteria.p__Proteobacteria.c__Alphaproteobacteria.o__Rickettsiales	4.3284			0.0108575		k__Fungi	p__Glomeromycota	c__Glomeromycetes	o__Glomerales	f__Glomeraceae	g__Glomus 3	06473131113 -
k__Bacteria.p__Proteobacteria.c__Alphaproteobacteria.o__Rickettsiales.f__SM2D12.g__SM2D12	2.72587			-		k__Fungi	p__Basidiomycota	c__Ustilaginomycetes	o__Ustilaginales	f__Ustilaginaceae	g__Pseudozyma	s__Pseudozyma_hubeiensis 2	92411237023 0	262385626803
k__Bacteria.p__Verrucomicrobiota.c__Chlamydiae.o__Chlamydiales.f__Parachlamydiaceae	3.58115			-		k__Fungi	p__Basidiomycota	c__Tremellomycetes	o__Tremellales	f__Rhynchogastremataceae 3	28053194129 0	219652729363
k__Bacteria.p__Myxococcota.c__Polyangia	4.04823			-		k__Fungi	p__Basidiomycota	c__Agaricomycetes	o__Agaricales	f__Agaricaceae 4	8943087846 -
k__Bacteria.p__Patescibacteria.c__Saccharimonadia.o__Saccharimonadales.f__WWH38.g__WWH38	3.77643			0.00932112		k__Fungi	p__Basidiomycota	c__Agaricomycetes	o__Agaricales	f__Pleurotaceae	g__Nematoctonus 2	7448159713 -
k__Bacteria.p__Actinobacteriota.c__Acidimicrobiia.o__IMCC26256.f__IMCC26256.g__IMCC26256	4.51504	XCK	4.16103	0.0053716		k__Fungi	p__Ascomycota	c__Sordariomycetes	o__Hypocreales	f__Bionectriaceae	g__Clonostachys	s__Clonostachys_solani 3	99496479378 -
k__Bacteria.p__Elusimicrobiota.c__Lineage_IIa.o__Lineage_IIa.f__Lineage_IIa.g__Lineage_IIa	3.14363			0.042659		k__Fungi	p__Basidiomycota	c__Tremellomycetes	o__Tremellales	f__Trimorphomycetaceae	g__Saitozyma	s__Saitozyma_podzolica 3	54262190968 -
k__Bacteria.p__Proteobacteria.c__Gammaproteobacteria.o__Diplorickettsiales	3.53349			0.0151336		k__Fungi	p__Ascomycota	c__Sordariomycetes	o__Hypocreales	f__Clavicipitaceae	g__Metarhizium	s__Metarhizium_carneum 2	7448159713 -
k__Bacteria.p__Firmicutes.c__Bacilli.o__Bacillales.f__Bacillaceae.g__Bacillus.s__Bacillus_nealsonii	3.02239			-		k__Fungi	p__Glomeromycota	c__Glomeromycetes	o__Diversisporales	f__Diversisporales_fam_Incertae_sedis	g__Entrophospora 2	73505613401 -
k__Bacteria.p__Acidobacteriota.c__Holophagae.o__Subgroup_7.f__Subgroup_7	4.033			0.0198554		k__Fungi	p__Ascomycota	c__Eurotiomycetes	o__Chaetothyriales	f__Trichomeriaceae	g__Knufia 4	25026743834 0	207705244037
k__Bacteria.p__Bacteroidota	4.39856	XGJ	4.06297	0.0214838		k__Fungi	p__Ascomycota	c__Sordariomycetes	o__Branch06 4	50816075872 -
k__Bacteria.p__Cyanobacteria.c__Sericytochromatia	2.63175			-		k__Fungi	p__Glomeromycota	c__Glomeromycetes	o__Diversisporales	f__Gigasporaceae	g__Racocetra	s__Racocetra_crispa 3	53014580631 -
k__Bacteria.p__Actinobacteriota.c__MB_A2_108	3.81833			0.0237166		k__Fungi	p__Ascomycota	c__Sordariomycetes	o__Hypocreales	f__Nectriaceae 4	4054706779 -
k__Bacteria.p__Proteobacteria.c__Alphaproteobacteria.o__Tistrellales.f__Geminicoccaceae	2.9506			-		k__Fungi	p__Ascomycota	c__Dothideomycetes	o__Pleosporales	f__Phaeosphaeriaceae	g__Sclerostagonospora	s__Sclerostagonospora_cycadis 3	45427438725 -
k__Bacteria.p__Proteobacteria.c__Gammaproteobacteria.o__Burkholderiales.f__Burkholderiaceae.g__Burkholderia_Caballeronia_Paraburkholderia.s__Paraburkholderia_caledonica	3.13464			-		k__Fungi	p__Ascomycota	c__Dothideomycetes	o__Pleosporales	f__Teichosporaceae 2	64183181058 -
k__Bacteria.p__Acidobacteriota.c__Holophagae	4.033			0.0198554
k__Bacteria.p__WPS_2.c__WPS_2.o__WPS_2	4.4431	LGJ	4.04534	0.0220984
k__Bacteria.p__Myxococcota.c__Polyangia.o__Polyangiales.f__Polyangiaceae.g__Minicystis	2.51173			-
k__Bacteria.p__Proteobacteria.c__Gammaproteobacteria.o__Burkholderiales.f__Oxalobacteraceae	3.17169			-
k__Bacteria.p__Verrucomicrobiota.c__Chlamydiae.o__Chlamydiales.f__Parachlamydiaceae.g__Neochlamydia	3.32343			-
k__Bacteria.p__Armatimonadota.c__Fimbriimonadia.o__Fimbriimonadales	3.02242			-
k__Bacteria.p__Actinobacteriota.c__Acidimicrobiia.o__Microtrichales.f__Ilumatobacteraceae	2.66319			-
k__Bacteria.p__Actinobacteriota.c__Actinobacteria.o__Streptosporangiales.f__Streptosporangiales_Incertae_Sedis.g__Motilibacter	2.64603			-
k__Bacteria.p__Actinobacteriota.c__Actinobacteria.o__Propionibacteriales.f__Nocardioidaceae	3.47996			0.0485938
k__Bacteria.p__Gemmatimonadota.c__Gemmatimonadetes.o__Gemmatimonadales.f__Gemmatimonadaceae	4.65432			-
k__Bacteria.p__Actinobacteriota.c__Actinobacteria.o__Corynebacteriales.f__Mycobacteriaceae.g__Mycobacterium	4.52965	LGJ	4.17451	0.0244998
k__Bacteria.p__Abditibacteriota	3.19799			0.032258
k__Bacteria.p__Actinobacteriota.c__Actinobacteria.o__Pseudonocardiales.f__Pseudonocardiaceae.g__Actinopolyspora	2.82442			0.00984658
k__Bacteria.p__Acidobacteriota.c__Acidobacteriae.o__Subgroup_13	3.90088			0.0212826
k__Bacteria.p__Methylomirabilota.c__Methylomirabilia.o__Rokubacteriales	3.53488			-
k__Bacteria.p__Acidobacteriota.c__Vicinamibacteria.o__Vicinamibacterales.f__Vicinamibacteraceae.g__Vicinamibacter	3.37867			0.0222227
k__Bacteria.p__Abditibacteriota.c__Abditibacteria.o__Abditibacteriales	3.19799			0.032258
k__Bacteria.p__Chloroflexi.c__Anaerolineae.o__RBG_13_54_9.f__RBG_13_54_9	3.47891			0.0400126
k__Bacteria.p__Chloroflexi.c__Chloroflexia.o__Thermomicrobiales.f__JG30_KF_CM45	3.80177			-
k__Bacteria.p__Proteobacteria.c__Alphaproteobacteria.o__Reyranellales.f__Reyranellaceae	3.89343			0.0239817
k__Bacteria.p__GAL15.c__GAL15	4.34887			0.00836778
k__Bacteria.p__Actinobacteriota.c__Actinobacteria.o__Streptomycetales.f__Streptomycetaceae.g__Streptacidiphilus	2.99033			-
k__Bacteria.p__Acidobacteriota.c__Acidobacteriae.o__PAUC26f.f__PAUC26f.g__PAUC26f	3.17478			-
k__Bacteria.p__Actinobacteriota.c__Actinobacteria.o__0319_7L14.f__0319_7L14	3.50922			-
k__Bacteria.p__Planctomycetota.c__vadinHA49.o__vadinHA49.f__vadinHA49.g__vadinHA49	2.41602			-
k__Bacteria.p__Actinobacteriota.c__Actinobacteria.o__Pseudonocardiales.f__Pseudonocardiaceae.g__Kutzneria.s__Kutzneria_albida	2.84924			-
k__Bacteria.p__Actinobacteriota.c__Actinobacteria.o__Frankiales.f__Acidothermaceae.g__Acidothermus.s__Actinomycetales_bacterium	3.86973			0.0203152
k__Bacteria.p__Patescibacteria.c__Parcubacteria.o__Candidatus_Adlerbacteria.f__Candidatus_Adlerbacteria	3.02252			-
k__Bacteria.p__Bdellovibrionota.c__Bdellovibrionia	3.00905			0.0149552
k__Bacteria.p__Proteobacteria.c__Alphaproteobacteria.o__Rhodospirillales	3.13475			0.0173829
k__Bacteria.p__Proteobacteria.c__Alphaproteobacteria.o__Acetobacterales.f__Acetobacteraceae.g__Rhodopila	2.98393			-
k__Bacteria.p__Proteobacteria.c__Alphaproteobacteria.o__Rhizobiales.f__A0839.g__A0839	2.78049			0.0483151
k__Bacteria.p__SAR324_cladeMarine_group_B	2.59398			-
k__Bacteria.p__GAL15.c__GAL15.o__GAL15.f__GAL15	4.34887			0.00836778
k__Bacteria.p__Armatimonadota.c__Armatimonadia.o__Armatimonadales.f__Armatimonadales	2.87698			-
k__Bacteria.p__Patescibacteria.c__Parcubacteria.o__Parcubacteria.f__Parcubacteria.g__Parcubacteria	3.21153			-
k__Bacteria.p__Acidobacteriota.c__Acidobacteriae.o__Solibacterales.f__Solibacteraceae.g__Candidatus_Solibacter	4.64541			-
k__Archaea.p__Crenarchaeota.c__Bathyarchaeia.o__Bathyarchaeia.f__Bathyarchaeia.g__Bathyarchaeia.s__archaeon_RBG_16_50_20	3.12544			-
k__Bacteria.p__Proteobacteria.c__Alphaproteobacteria.o__Elsterales	4.5843	XCK	4.06609	0.0295208
k__Bacteria.p__Patescibacteria.c__Parcubacteria.o__Candidatus_Kaiserbacteria	3.38058			-
k__Bacteria.p__Planctomycetota.c__Planctomycetes.o__Pirellulales	3.77979			-
k__Bacteria.p__Bacteroidota.c__Bacteroidia.o__Bacteroidales	2.88313			-
k__Bacteria.p__Proteobacteria.c__Alphaproteobacteria.o__Caulobacterales.f__Hyphomonadaceae	2.86223			-
k__Bacteria.p__Actinobacteriota.c__Acidimicrobiia.o__IMCC26256	4.51504	XCK	4.13999	0.0053716
k__Bacteria.p__Actinobacteriota.c__Actinobacteria.o__Frankiales.f__Geodermatophilaceae.g__Geodermatophilus	3.01944			0.044636
k__Bacteria.p__Chloroflexi.c__Ktedonobacteria.o__B10_SB3A	2.64599			-
k__Bacteria.p__MBNT15.c__MBNT15.o__MBNT15.f__MBNT15.g__MBNT15.s__delta_proteobacterium	2.65641			-
k__Bacteria.p__Actinobacteriota.c__Acidimicrobiia.o__IMCC26256.f__IMCC26256	4.51504	XCK	4.14148	0.0053716
k__Bacteria.p__Acidobacteriota.c__Blastocatellia.o__11_24	2.62447			0.0156685
k__Bacteria.p__Actinobacteriota.c__Thermoleophilia.o__Solirubrobacterales.f__67_14	3.9755			0.0169349
k__Archaea.p__Crenarchaeota.c__Bathyarchaeia.o__Bathyarchaeia.f__Bathyarchaeia.g__Bathyarchaeia	3.86979			-
k__Bacteria.p__Patescibacteria.c__Saccharimonadia	4.16674			0.0087492
k__Bacteria.p__Proteobacteria.c__Alphaproteobacteria.o__Sphingomonadales.f__Sphingomonadaceae.g__Sphingomonas	4.00758			-
k__Bacteria.p__Cyanobacteria.c__Sericytochromatia.o__Sericytochromatia	2.63175			-
k__Bacteria.p__Proteobacteria.c__Gammaproteobacteria.o__WD260.f__WD260.g__WD260	2.76222			0.0336748
k__Bacteria.p__Chloroflexi.c__Ktedonobacteria.o__B12_WMSP1.f__B12_WMSP1.g__B12_WMSP1	3.62702			-
k__Bacteria.p__Proteobacteria.c__Gammaproteobacteria.o__Diplorickettsiales.f__Diplorickettsiaceae.g__Aquicella	3.30308			0.0248305
k__Bacteria.p__Chloroflexi.c__TK10.o__TK10.f__TK10.g__TK10.s__bacterium_Ellin6519	3.68002			-
k__Bacteria.p__Proteobacteria.c__Alphaproteobacteria.o__Rhizobiales.f__Hyphomicrobiaceae.g__Hyphomicrobium	3.24279			0.0116116
k__Bacteria.p__Proteobacteria.c__Alphaproteobacteria.o__Rhizobiales.f__Rhizobiaceae.g__Allorhizobium_Neorhizobium_Pararhizobium_Rhizobium	3.51306			0.00827441
k__Bacteria.p__Proteobacteria.c__Alphaproteobacteria.o__Azospirillales.f__Azospirillaceae	2.79061			0.0425101
k__Bacteria.p__Myxococcota.c__Polyangia.o__Haliangiales	3.77764			-
k__Bacteria.p__Planctomycetota.c__Planctomycetes.o__Isosphaerales.f__Isosphaeraceae.g__Tundrisphaera	3.46373			0.0120777
k__Bacteria.p__Acidobacteriota.c__Blastocatellia.o__11_24.f__11_24	2.62447			0.0156685
k__Bacteria.p__Actinobacteriota.c__Thermoleophilia.o__Solirubrobacterales.f__Solirubrobacteraceae	4.54019			-
k__Bacteria.p__Chloroflexi.c__Ktedonobacteria.o__Ktedonobacterales	4.84058			-
k__Bacteria.p__Myxococcota.c__Polyangia.o__Blfdi19	2.30856			-
k__Bacteria.p__Cyanobacteria.c__Cyanobacteriia.o__Cyanobacteriales.f__Coleofasciculaceae	3.13807			-
k__Bacteria.p__Planctomycetota.c__Phycisphaerae	4.59135	LGJ	4.24394	0.0188263
k__Bacteria.p__Chloroflexi.c__Gitt_GS_136	2.93642			-
k__Bacteria.p__Bacteroidota.c__Bacteroidia.o__Chitinophagales.f__Chitinophagaceae.g__Filimonas	2.72284			0.0262386
k__Bacteria.p__Firmicutes.c__Bacilli.o__Paenibacillales.f__Paenibacillaceae.g__Paenibacillus	3.97859			0.00849834
k__Bacteria.p__Proteobacteria.c__Alphaproteobacteria.o__Rhizobiales.f__Xanthobacteraceae.g__Rhodoplanes	3.33577			0.0134264
k__Bacteria.p__Firmicutes.c__Bacilli.o__Bacillales.f__Bacillaceae.g__Bacillus.s__Bacillus_funiculus	2.54382			-
k__Bacteria.p__Actinobacteriota.c__Actinobacteria.o__Propionibacteriales.f__Nocardioidaceae.g__Kribbella	2.9935			0.0211446
k__Bacteria.p__Dadabacteria.c__Dadabacteriia.o__Dadabacteriales	3.32635			0.0142741
k__Bacteria.p__Firmicutes.c__Bacilli.o__Paenibacillales.f__Paenibacillaceae.g__Paenibacillus.s__Paenibacillus_chartarius	3.16217			0.0136426
k__Bacteria.p__Bacteroidota.c__Bacteroidia.o__Sphingobacteriales.f__Sphingobacteriaceae.g__Mucilaginibacter	3.2694			0.0115198
k__Bacteria.p__Chloroflexi.c__Chloroflexia	3.80445			-
k__Bacteria.p__Myxococcota.c__Myxococcia.o__Myxococcales.f__Myxococcaceae	3.57623			0.0407552
k__Bacteria.p__Patescibacteria	4.2958			0.0336054
k__Bacteria.p__Proteobacteria.c__Alphaproteobacteria.o__Rhizobiales.f__Rhodomicrobiaceae	2.88717			-
k__Bacteria.p__Planctomycetota.c__Planctomycetes.o__Gemmatales.f__Gemmataceae.g__Gemmata	3.64037			-
k__Bacteria.p__Actinobacteriota.c__MB_A2_108.o__MB_A2_108.f__MB_A2_108.g__MB_A2_108	3.81833			0.0237166
k__Bacteria.p__Proteobacteria.c__Alphaproteobacteria.o__Rhizobiales.f__Devosiaceae	2.95399			0.0207418
k__Bacteria.p__Actinobacteriota.c__Actinobacteria.o__Streptosporangiales.f__Streptosporangiaceae.g__Acrocarpospora	2.81506			-
k__Bacteria.p__Actinobacteriota.c__Thermoleophilia.o__Gaiellales.f__Gaiellaceae	3.21156			-
k__Bacteria.p__Actinobacteriota.c__Actinobacteria.o__Catenulisporales.f__Catenulisporaceae.g__Catenulispora.s__Catenulispora_rubra	2.87893			0.0146802
k__Bacteria.p__Proteobacteria.c__Alphaproteobacteria.o__Azospirillales.f__Inquilinaceae.g__Inquilinus	2.96934			0.02684
k__Bacteria.p__Proteobacteria.c__Alphaproteobacteria.o__Rhizobiales.f__Amb_16S_1323.g__Amb_16S_1323	3.06446			-
k__Bacteria.p__Acidobacteriota.c__Acidobacteriae.o__Solibacterales.f__Solibacteraceae	4.64541			-
k__Bacteria.p__Proteobacteria.c__Gammaproteobacteria.o__Diplorickettsiales.f__Diplorickettsiaceae	3.53349			0.0151336
k__Bacteria.p__Acidobacteriota.c__Acidobacteriae.o__Acidobacteriales.f__Acidobacteriaceae_Subgroup_1.g__Edaphobacter	3.93296			0.0206218
k__Bacteria.p__Chloroflexi.c__TK10.o__TK10.f__TK10.g__TK10	4.50964	LCK	4.16338	0.0295208
k__Bacteria.p__Firmicutes.c__Bacilli.o__Bacillales.f__Planococcaceae.g__Lysinibacillus	3.17686			0.0140376
k__Bacteria.p__Elusimicrobiota.c__Elusimicrobia.o__Lineage_IV.f__Lineage_IV.g__Lineage_IV	3.23381			0.0252406
k__Bacteria.p__Verrucomicrobiota.c__Verrucomicrobiae.o__Chthoniobacterales.f__Chthoniobacteraceae.g__Candidatus_Udaeobacter.s__Spartobacteria_bacterium	3.00445			0.0483151
k__Archaea.p__Crenarchaeota.c__Bathyarchaeia.o__Bathyarchaeia	3.86979			-
k__Bacteria.p__Actinobacteriota.c__Actinobacteria.o__0319_7L14.f__0319_7L14.g__0319_7L14	3.50922			-
k__Bacteria.p__Proteobacteria.c__Gammaproteobacteria.o__Burkholderiales.f__Nitrosomonadaceae.g__MND1	4.25809			0.0177385
k__Bacteria.p__Proteobacteria.c__Alphaproteobacteria.o__Caulobacterales.f__Caulobacteraceae	4.01482			0.025197
k__Bacteria.p__Acidobacteriota.c__Acidobacteriae.o__Acidobacteriales.f__Acidobacteriaceae_Subgroup_1.g__Occallatibacter	3.39016			0.0389083
k__Bacteria.p__Proteobacteria.c__Alphaproteobacteria.o__Acetobacterales.f__Acetobacteraceae.g__Roseomonas	2.87066			-
k__Bacteria.p__Actinobacteriota.c__Thermoleophilia.o__Gaiellales.f__Gaiellaceae.g__Gaiella	3.21156			-
k__Bacteria.p__Proteobacteria.c__Alphaproteobacteria.o__Rhizobiales.f__A0839	2.78049			0.0483151
k__Bacteria.p__Acidobacteriota.c__Acidobacteriae.o__Subgroup_2.f__Subgroup_2	4.44148	XCK	4.09526	0.0458811
k__Bacteria.p__Chloroflexi.c__Anaerolineae.o__Anaerolineae.f__Anaerolineae	2.93096			0.00482615
k__Bacteria.p__Firmicutes	4.50414	LCK	4.12462	0.0249625
k__Bacteria.p__Actinobacteriota.c__Actinobacteria.o__Frankiales.f__Sporichthyaceae	3.18805			-
k__Bacteria.p__MBNT15.c__MBNT15.o__MBNT15.f__MBNT15.g__MBNT15	2.78305			-
k__Bacteria.p__WPS_2	4.4431	LGJ	4.04832	0.0220984
k__Bacteria.p__Actinobacteriota.c__Actinobacteria	5.39186	LGJ	5.02857	0.0151336
k__Bacteria.p__Actinobacteriota.c__Thermoleophilia.o__Gaiellales	4.65823	XGZ	4.29567	0.0109264
k__Bacteria.p__Chloroflexi.c__TK10.o__TK10.f__TK10	4.50964	LCK	4.12452	0.0295208
k__Bacteria.p__Chloroflexi.c__KD4_96.o__KD4_96.f__KD4_96	3.37147			0.0155182
k__Bacteria.p__Dependentiae.c__Babeliae.o__Babeliales	2.90087			-
k__Bacteria.p__Actinobacteriota.c__Actinobacteria.o__Propionibacteriales	3.61555			0.0475875
k__Bacteria.p__Actinobacteriota.c__Actinobacteria.o__Pseudonocardiales.f__Pseudonocardiaceae.g__Pseudonocardia	3.85077			0.0111789
k__Bacteria.p__Verrucomicrobiota.c__Verrucomicrobiae.o__Pedosphaerales.f__Pedosphaeraceae.g__ADurb_Bin063_1	3.81715			0.0187201
k__Bacteria.p__Chloroflexi.c__Ktedonobacteria.o__C0119	2.72868			0.0193895
k__Bacteria.p__Gemmatimonadota.c__Gemmatimonadetes.o__Gemmatimonadales.f__Gemmatimonadaceae.g__Gemmatimonas	3.84349			-
k__Bacteria.p__Chloroflexi.c__Ktedonobacteria	4.86886	XCK	4.40242	0.0462997
k__Bacteria.p__Chloroflexi.c__P2_11E.o__P2_11E.f__P2_11E	3.45129			0.046937
k__Bacteria.p__Actinobacteriota.c__Actinobacteria.o__Pseudonocardiales	4.75232	LGJ	4.43238	0.0112466
k__Bacteria.p__Armatimonadota.c__Chthonomonadetes.o__Chthonomonadales.f__Chthonomonadaceae	3.35329			-
k__Bacteria.p__Bacteroidota.c__Kapabacteria.o__Kapabacteriales	2.76752			0.0293889
k__Bacteria.p__Verrucomicrobiota.c__Verrucomicrobiae.o__Pedosphaerales.f__Pedosphaeraceae.g__Ellin516	3.34995			0.0270095
k__Bacteria.p__Verrucomicrobiota.c__Verrucomicrobiae.o__Pedosphaerales.f__Pedosphaeraceae.g__Ellin517	2.66999			0.0354227
k__Bacteria.p__Proteobacteria.c__Gammaproteobacteria.o__Burkholderiales.f__Nitrosomonadaceae	4.32511	LCK	4.05612	0.0216868
k__Bacteria.p__GAL15.c__GAL15.o__GAL15	4.34887			0.00836778
k__Bacteria.p__Verrucomicrobiota.c__Verrucomicrobiae.o__Chthoniobacterales.f__Xiphinematobacteraceae	3.67621			0.042659
k__Bacteria.p__Chloroflexi.c__TK10.o__TK10.f__TK10.g__TK10.s__bacterium_Ellin6543	2.6861			-
k__Bacteria.p__Chloroflexi.c__Gitt_GS_136.o__Gitt_GS_136.f__Gitt_GS_136.g__Gitt_GS_136	2.93642			-
k__Bacteria.p__FCPU426	2.84037			-
k__Bacteria.p__Elusimicrobiota.c__Elusimicrobia.o__Lineage_IV.f__Lineage_IV	3.23381			0.0252406
k__Bacteria.p__Proteobacteria.c__Alphaproteobacteria.o__Dongiales	3.34217			0.0113303
k__Bacteria.p__Acidobacteriota.c__Acidobacteriae.o__Subgroup_13.f__Subgroup_13	3.90088			0.0212826
k__Bacteria.p__Planctomycetota.c__Planctomycetes.o__Isosphaerales.f__Isosphaeraceae	4.49611	LGJ	4.12722	0.0158715
k__Bacteria.p__Planctomycetota.c__Phycisphaerae.o__Tepidisphaerales.f__CPla_3_termite_group	3.2019			-
k__Bacteria.p__Actinobacteriota.c__MB_A2_108.o__MB_A2_108	3.81833			0.0237166
k__Bacteria.p__Proteobacteria.c__Alphaproteobacteria	5.25934	XGJ	4.81777	0.0210832
k__Bacteria.p__Bacteroidota.c__Bacteroidia.o__Flavobacteriales.f__Weeksellaceae	3.6827			-
k__Bacteria.p__Verrucomicrobiota.c__Verrucomicrobiae.o__Chthoniobacterales	4.46004	LGZ	4.07251	0.0103125
k__Bacteria.p__Bdellovibrionota.c__Bdellovibrionia.o__Bdellovibrionales	3.00905			0.0149552
k__Bacteria.p__Proteobacteria.c__Alphaproteobacteria.o__Rhizobiales.f__Labraceae	3.00895			0.0124742
k__Bacteria.p__Firmicutes.c__Bacilli.o__Erysipelotrichales	2.9086			-
k__Bacteria.p__Proteobacteria.c__Alphaproteobacteria.o__Acetobacterales.f__Acetobacteraceae	4.48595			-
k__Bacteria.p__WPS_2.c__WPS_2.o__WPS_2.f__WPS_2	4.4431	LGJ	4.05202	0.0220984
k__Bacteria.p__Firmicutes.c__Bacilli.o__Bacillales.f__Bacillaceae	4.0615			-
k__Bacteria.p__Cyanobacteria.c__Cyanobacteriia.o__Cyanobacteriales	3.16539			-
k__Bacteria.p__Proteobacteria.c__Alphaproteobacteria.o__Rhizobiales.f__Xanthobacteraceae.g__Pseudolabrys	3.16747			-
k__Bacteria.p__Armatimonadota.c__Armatimonadia.o__Armatimonadales.f__Armatimonadales.g__Armatimonadales	2.87698			-
k__Bacteria.p__Verrucomicrobiota.c__Verrucomicrobiae.o__Chthoniobacterales.f__Chthoniobacteraceae	4.36526	LGZ	4.00523	0.0080957
k__Bacteria.p__Chloroflexi.c__JG30_KF_CM66	3.77632			0.0227299
k__Bacteria.p__Myxococcota	4.2427			-
k__Bacteria.p__Myxococcota.c__Myxococcia.o__Myxococcales.f__Anaeromyxobacteraceae	3.77113			0.0358445
k__Bacteria.p__Proteobacteria.c__Gammaproteobacteria.o__Coxiellales.f__Coxiellaceae	2.32344			-
k__Bacteria.p__Patescibacteria.c__Saccharimonadia.o__Saccharimonadales.f__LWQ8	3.77399			0.0201129
k__Bacteria.p__Gemmatimonadota.c__Gemmatimonadetes.o__Gemmatimonadales.f__Gemmatimonadaceae.g__Gemmatimonas.s__bacterium_Ellin5290	2.66316			-
k__Bacteria.p__Proteobacteria.c__Gammaproteobacteria.o__Xanthomonadales	3.7669			0.0329473
k__Bacteria.p__Actinobacteriota.c__Actinobacteria.o__Micromonosporales.f__Micromonosporaceae.g__Actinoplanes	2.73727			0.0454851
k__Bacteria.p__Proteobacteria.c__Alphaproteobacteria.o__Rickettsiales.f__SM2D12	2.72587			-
k__Bacteria.p__Proteobacteria.c__Alphaproteobacteria.o__Rhizobiales.f__Rhizobiales_Incertae_Sedis.g__Nordella	2.95914			0.0296984
k__Bacteria.p__Actinobacteriota.c__Actinobacteria.o__Corynebacteriales.f__Nocardiaceae.g__Nocardia	3.0297			-
k__Bacteria.p__Proteobacteria.c__Gammaproteobacteria.o__Xanthomonadales.f__Rhodanobacteraceae.g__Rhodanobacter	2.98232			-
k__Bacteria.p__Actinobacteriota.c__Actinobacteria.o__Frankiales	5.14111	LGJ	4.79966	0.0122624
k__Bacteria.p__Firmicutes.c__Bacilli.o__Paenibacillales	4.34404	LCK	4.07201	0.0118004
k__Bacteria.p__Chloroflexi.c__Dehalococcoidia.o__S085.f__S085.g__S085	2.45022			0.014913
k__Bacteria.p__Proteobacteria.c__Alphaproteobacteria.o__Rhizobiales.f__Amb_16S_1323	3.06446			-
k__Bacteria.p__Actinobacteriota.c__Actinobacteria.o__Micrococcales.f__Microbacteriaceae.g__Leifsonia	2.69871			0.0366532
k__Bacteria.p__Proteobacteria.c__Alphaproteobacteria.o__Rhizobiales.f__Xanthobacteraceae.g__Starkeya	2.93641			-
k__Bacteria.p__Myxococcota.c__Polyangia.o__Haliangiales.f__Haliangiaceae.g__Haliangium	3.77764			-
k__Bacteria.p__Bacteroidota.c__Bacteroidia.o__Sphingobacteriales.f__env_OPS_17	2.66986			-
k__Bacteria.p__Firmicutes.c__Bacilli.o__Brevibacillales.f__Brevibacillaceae.g__Brevibacillus	3.43906			0.0084089
k__Bacteria.p__Planctomycetota.c__Planctomycetes.o__Pirellulales.f__Pirellulaceae	3.77979			-
k__Bacteria.p__Planctomycetota.c__Planctomycetes.o__Gemmatales.f__Gemmataceae.g__Fimbriiglobus	2.68625			0.0240587
k__Bacteria.p__Firmicutes.c__Bacilli.o__Bacillales.f__Bacillaceae.g__Bacillus	4.05799			-
k__Bacteria.p__Chloroflexi.c__Anaerolineae.o__Anaerolineae	2.93096			0.00482615
k__Bacteria.p__Chloroflexi.c__Dehalococcoidia	2.45022			0.014913
k__Bacteria.p__Actinobacteriota.c__Acidimicrobiia	4.65757	XCK	4.28133	0.0066628
k__Bacteria.p__Proteobacteria.c__Alphaproteobacteria.o__Rhizobiales.f__Rhizobiales_Incertae_Sedis	3.26102			-
k__Bacteria.p__Cyanobacteria	5.35667	XGJ	5.02629	0.022307
k__Bacteria.p__Myxococcota.c__Polyangia.o__Blfdi19.f__Blfdi19	2.30856			-
k__Bacteria.p__Bacteroidota.c__Bacteroidia.o__Flavobacteriales	3.69507			-
k__Bacteria.p__Acidobacteriota.c__Vicinamibacteria.o__Vicinamibacterales.f__Vicinamibacteraceae.g__Vicinamibacteraceae	2.9742			0.0217628
k__Bacteria.p__SAR324_cladeMarine_group_B.c__SAR324_cladeMarine_group_B.o__SAR324_cladeMarine_group_B	2.59398			-
k__Bacteria.p__Proteobacteria.c__Gammaproteobacteria.o__Salinisphaerales	3.08417			0.0452622
k__Bacteria.p__Elusimicrobiota.c__Elusimicrobia	3.23381			0.0252406
k__Bacteria.p__Actinobacteriota.c__Actinobacteria.o__0319_7L14	3.50922			-
k__Bacteria.p__Acidobacteriota.c__Blastocatellia.o__Pyrinomonadales.f__Pyrinomonadaceae	3.18909			0.0357763
k__Bacteria.p__Acidobacteriota.c__Acidobacteriae.o__Acidobacteriales.f__Koribacteraceae.g__Candidatus_Koribacter	3.93351			0.0484473
k__Bacteria.p__Bacteroidota.c__Kapabacteria	2.76752			0.0293889
k__Bacteria.p__Proteobacteria.c__Gammaproteobacteria.o__Salinisphaerales.f__Solimonadaceae	3.08417			0.0452622
k__Bacteria.p__Planctomycetota.c__Phycisphaerae.o__Tepidisphaerales.f__WD2101_soil_group	4.57326	LGJ	4.2335	0.0174529
k__Bacteria.p__Chloroflexi.c__TK10.o__TK10	4.50964	LCK	4.11878	0.0295208
k__Bacteria.p__Proteobacteria.c__Alphaproteobacteria.o__Azospirillales.f__Azospirillaceae.g__Azospirillum	2.79061			0.0439769
k__Bacteria.p__Methylomirabilota.c__Methylomirabilia.o__Rokubacteriales.f__Rokubacteriales.g__Rokubacteriales	3.52804			-
k__Bacteria.p__Firmicutes.c__Bacilli.o__Entomoplasmatales.f__type_III	3.4502			0.014987
k__Bacteria.p__Proteobacteria.c__Gammaproteobacteria.o__Burkholderiales.f__Chromobacteriaceae	2.83364			0.0290766
k__Bacteria.p__Myxococcota.c__Polyangia.o__Polyangiales.f__BIrii41.g__BIrii41	3.01046			0.0363876
k__Bacteria.p__Myxococcota.c__Polyangia.o__mle1_27	2.72868			0.0208178
k__Bacteria.p__Chloroflexi.c__Ktedonobacteria.o__Ktedonobacterales.f__Ktedonobacteraceae.g__HSB_OF53_F07	3.72458			0.0404989
k__Bacteria.p__Proteobacteria.c__Alphaproteobacteria.o__Rhizobiales.f__KF_JG30_B3.g__KF_JG30_B3	2.92917			-
k__Bacteria.p__Proteobacteria.c__Gammaproteobacteria.o__Pseudomonadales.f__Moraxellaceae.g__Acinetobacter.s__Acinetobacter_lwoffii	4.3354	LCK	4.18178	0.00482615
k__Bacteria.p__Bdellovibrionota	3.40516			-
k__Bacteria.p__Acidobacteriota.c__Holophagae.o__Subgroup_7.f__Subgroup_7.g__Subgroup_7	4.033			0.0198554
k__Bacteria.p__Myxococcota.c__Polyangia.o__Haliangiales.f__Haliangiaceae	3.77764			-
k__Bacteria.p__Chloroflexi.c__P2_11E.o__P2_11E	3.45129			0.046937
k__Bacteria.p__Proteobacteria.c__Gammaproteobacteria.o__Burkholderiales.f__Comamonadaceae.g__Ramlibacter	2.72286			0.0265675
k__Bacteria.p__Actinobacteriota.c__Thermoleophilia.o__Solirubrobacterales	4.64244			-
k__Bacteria.p__Planctomycetota.c__BD7_11.o__BD7_11.f__BD7_11	3.10157			-
k__Bacteria.p__Actinobacteriota.c__Actinobacteria.o__Streptosporangiales.f__Thermomonosporaceae	3.76583			0.0389323
k__Archaea.p__Crenarchaeota.c__Nitrososphaeria	3.72518			0.038225
k__Bacteria.p__Planctomycetota.c__BD7_11.o__BD7_11.f__BD7_11.g__BD7_11	3.10157			-
k__Bacteria.p__Proteobacteria.c__Alphaproteobacteria.o__Reyranellales	3.89343			0.0239817
k__Bacteria.p__Actinobacteriota.c__Actinobacteria.o__Pseudonocardiales.f__Pseudonocardiaceae.g__Actinomycetospora	3.49358			0.0195642
k__Bacteria.p__Proteobacteria.c__Alphaproteobacteria.o__Acetobacterales.f__Acetobacteraceae.g__Acidicaldus	3.47321			-
k__Bacteria.p__Myxococcota.c__Myxococcia.o__Myxococcales	3.88641			0.014156
k__Bacteria.p__Actinobacteriota.c__Actinobacteria.o__Micromonosporales	3.95912			0.019924
k__Bacteria.p__Chloroflexi.c__P2_11E	3.45129			0.046937
k__Bacteria.p__Planctomycetota.c__Phycisphaerae.o__Phycisphaerales.f__Phycisphaeraceae.g__SM1A02	2.76478			0.0178744
k__Bacteria.p__RCP2_54.c__RCP2_54.o__RCP2_54	3.76927			0.0161763
k__Bacteria.p__Chloroflexi.c__Ktedonobacteria.o__B10_SB3A.f__B10_SB3A.g__B10_SB3A	2.64599			-
k__Bacteria.p__Chloroflexi.c__Anaerolineae.o__RBG_13_54_9	3.47891			0.0400126
k__Bacteria.p__Planctomycetota.c__Planctomycetes.o__Gemmatales	4.86719	LCK	4.3991	0.00692805
k__Bacteria.p__Cyanobacteria.c__Vampirivibrionia.o__Obscuribacterales	3.30854			-
k__Bacteria.p__Actinobacteriota.c__Acidimicrobiia.o__Microtrichales	3.43055			0.0199583
k__Bacteria.p__Proteobacteria.c__Gammaproteobacteria.o__Burkholderiales	4.66354	XGJ	4.28421	0.0475772
k__Bacteria.p__Proteobacteria.c__Gammaproteobacteria.o__Burkholderiales.f__Burkholderiaceae.g__Pandoraea	2.80542			-
k__Bacteria.p__Proteobacteria.c__Alphaproteobacteria.o__Rhizobiales.f__Beijerinckiaceae.g__1174_901_12.s__Rhizobiales_bacterium	2.50681			-
k__Bacteria.p__Actinobacteriota.c__Acidimicrobiia.o__Acidimicrobiales.f__Acidimicrobiaceae	2.60949			-
k__Bacteria.p__Proteobacteria.c__Gammaproteobacteria.o__Gammaproteobacteria_Incertae_Sedis	4.34543			0.0168029
k__Bacteria.p__Firmicutes.c__Bacilli.o__Bacillales	4.12019			-
k__Archaea.p__Crenarchaeota.c__Nitrososphaeria.o__Group_1_1c	3.53533			0.0289237
k__Bacteria.p__Dependentiae.c__Babeliae.o__Babeliales.f__Babeliaceae.g__Babeliaceae	2.85142			-
k__Bacteria.p__Dadabacteria	3.32635			0.0142741
k__Bacteria.p__Acidobacteriota.c__Thermoanaerobaculia.o__Thermoanaerobaculales.f__Thermoanaerobaculaceae.g__Subgroup_10.s__Acidobacteria_bacterium	2.79314			-
k__Bacteria.p__RCP2_54	3.76927			0.0161763
k__Bacteria.p__Proteobacteria.c__Gammaproteobacteria.o__Xanthomonadales.f__Rhodanobacteraceae.g__Dyella	3.19996			-
k__Bacteria.p__Chloroflexi.c__AD3.o__AD3.f__AD3.g__AD3	5.46107	LCK	5.1176	0.007787
k__Bacteria.p__Proteobacteria.c__Alphaproteobacteria.o__Dongiales.f__Dongiaceae	3.34217			0.0113303
k__Bacteria.p__Firmicutes.c__Bacilli.o__Alicyclobacillales.f__Alicyclobacillaceae.g__Tumebacillus.s__Tumebacillus_ginsengisoli	2.86853			-
k__Bacteria.p__Actinobacteriota.c__Actinobacteria.o__Micrococcales.f__Micrococcaceae	3.02972			-
k__Bacteria.p__Chloroflexi.c__Ktedonobacteria.o__Ktedonobacterales.f__Ktedonobacterales.g__Ktedonobacterales	2.89696			-
k__Bacteria.p__Bdellovibrionota.c__Bdellovibrionia.o__Bdellovibrionales.f__Bdellovibrionaceae.g__Bdellovibrio	3.006			0.0139868
k__Bacteria.p__Bacteroidota.c__Bacteroidia.o__Sphingobacteriales.f__env_OPS_17.g__env_OPS_17	2.66986			-
k__Bacteria.p__Nitrospirota.c__Nitrospiria.o__Nitrospirales.f__Nitrospiraceae.g__Nitrospira.s__Nitrospira_japonica	3.12431			-
k__Bacteria.p__Chloroflexi.c__AD3.o__AD3.f__AD3	5.46107	LCK	5.13099	0.007787
k__Bacteria.p__Acidobacteriota.c__Blastocatellia.o__11_24.f__11_24.g__11_24	2.62447			0.0156685
k__Bacteria.p__Acidobacteriota.c__Subgroup_5.o__Subgroup_5.f__Subgroup_5.g__Subgroup_5	3.27359			0.0291948
k__Bacteria.p__Armatimonadota	3.8388			-
k__Bacteria.p__Proteobacteria.c__Gammaproteobacteria.o__WD260.f__WD260	2.76222			0.0336748
k__Bacteria.p__Proteobacteria.c__Gammaproteobacteria.o__Enterobacterales	3.04115			-
k__Bacteria.p__Patescibacteria.c__Parcubacteria.o__Candidatus_Kaiserbacteria.f__Candidatus_Kaiserbacteria	3.38058			-
k__Bacteria.p__Firmicutes.c__Bacilli	4.48534	LCK	4.09334	0.0247301
k__Bacteria.p__Gemmatimonadota.c__Gemmatimonadetes.o__Gemmatimonadales.f__Gemmatimonadaceae.g__Roseisolibacter	3.70771			0.023599
k__Bacteria.p__Verrucomicrobiota.c__Chlamydiae.o__Chlamydiales.f__Parachlamydiaceae.g__Candidatus_Protochlamydia	3.16218			-
k__Bacteria.p__Proteobacteria.c__Gammaproteobacteria.o__Pseudomonadales.f__Pseudomonadaceae.g__Pseudomonas	4.15288			0.0104124
k__Bacteria.p__Chloroflexi.c__JG30_KF_CM66.o__JG30_KF_CM66.f__JG30_KF_CM66	3.77632			0.0227299
k__Bacteria.p__Proteobacteria.c__Alphaproteobacteria.o__Rhizobiales.f__Beijerinckiaceae.g__Roseiarcus	3.60113			0.0249625
k__Archaea.p__Crenarchaeota.c__Nitrososphaeria.o__Group_1_1c.f__Group_1_1c.g__Group_1_1c	3.53533			0.0289237
k__Bacteria.p__Bacteroidota.c__Bacteroidia.o__Chitinophagales.f__Chitinophagaceae.g__Niastella	3.00895			0.0172917
k__Bacteria.p__Armatimonadota.c__Armatimonadia.o__Armatimonadales	2.87698			-
k__Bacteria.p__Abditibacteriota.c__Abditibacteria.o__Abditibacteriales.f__Abditibacteriaceae.g__Abditibacterium	3.19799			0.032258
k__Bacteria.p__Armatimonadota.c__Chthonomonadetes.o__Chthonomonadales.f__Chthonomonadales	3.40626			-
k__Bacteria.p__Proteobacteria.c__Gammaproteobacteria.o__Burkholderiales.f__Comamonadaceae	3.3819			-
k__Bacteria.p__Verrucomicrobiota.c__Verrucomicrobiae.o__Pedosphaerales.f__Pedosphaeraceae.g__Pedosphaeraceae	3.36414			-
k__Bacteria.p__SAR324_cladeMarine_group_B.c__SAR324_cladeMarine_group_B.o__SAR324_cladeMarine_group_B.f__SAR324_cladeMarine_group_B	2.59398			-
k__Bacteria.p__Acidobacteriota.c__Thermoanaerobaculia	3.3581			-
k__Bacteria.p__Planctomycetota.c__vadinHA49	2.41602			-
k__Bacteria.p__Actinobacteriota.c__Actinobacteria.o__Pseudonocardiales.f__Pseudonocardiaceae.g__Kutzneria	3.18706			0.0180769
k__Bacteria.p__Methylomirabilota	3.53488			-
k__Bacteria.p__Bdellovibrionota.c__Bdellovibrionia.o__Bdellovibrionales.f__Bdellovibrionaceae	3.00905			0.0149552
k__Bacteria.p__Planctomycetota.c__Planctomycetes.o__Planctomycetales.f__Schlesneriaceae.g__Schlesneria	2.901			0.0337022
k__Bacteria.p__Firmicutes.c__Clostridia	2.7857			-
k__Bacteria.p__Chloroflexi.c__Ktedonobacteria.o__Ktedonobacterales.f__Ktedonobacteraceae.g__1921_3	4.12904			-
k__Bacteria.p__Chloroflexi.c__Ktedonobacteria.o__Ktedonobacterales.f__Ktedonobacteraceae.g__1921_2	4.23191			-
k__Bacteria.p__Proteobacteria.c__Gammaproteobacteria.o__Pseudomonadales.f__Moraxellaceae	4.45506			-
k__Bacteria.p__Proteobacteria.c__Alphaproteobacteria.o__Elsterales.f__URHD0088.g__URHD0088	3.49121			0.0126204
k__Bacteria.p__Proteobacteria.c__Gammaproteobacteria.o__Burkholderiales.f__Burkholderiaceae.g__Burkholderia_Caballeronia_Paraburkholderia	4.51433	XGJ	4.21684	0.0203034
k__Bacteria.p__Proteobacteria.c__Gammaproteobacteria.o__Aeromonadales	3.66817			0.024748
k__Bacteria.p__Proteobacteria.c__Alphaproteobacteria.o__Tistrellales	2.9506			-
k__Bacteria.p__Cyanobacteria.c__Vampirivibrionia.o__Obscuribacterales.f__Obscuribacteraceae	3.30854			-
k__Archaea	4.15949			0.0259131
k__Bacteria.p__Actinobacteriota.c__Actinobacteria.o__Streptomycetales	4.34833	XGJ	4.00345	0.0345482
k__Bacteria.p__Actinobacteriota.c__Actinobacteria.o__Frankiales.f__Acidothermaceae.g__Acidothermus.s__bacterium_Ellin5129	2.98554			-
k__Bacteria.p__Actinobacteriota.c__Acidimicrobiia.o__Microtrichales.f__Iamiaceae	2.96757			0.0198049
k__Bacteria.p__MBNT15.c__MBNT15.o__MBNT15.f__MBNT15	2.78305			-
k__Bacteria.p__Nitrospirota.c__Nitrospiria.o__Nitrospirales.f__Nitrospiraceae.g__Nitrospira	3.91449			-
k__Bacteria.p__Firmicutes.c__Bacilli.o__Entomoplasmatales.f__type_III.g__type_III	3.4502			0.014987
k__Bacteria.p__Actinobacteriota.c__MB_A2_108.o__MB_A2_108.f__MB_A2_108	3.81833			0.0237166
k__Bacteria.p__Actinobacteriota.c__Actinobacteria.o__Frankiales.f__Acidothermaceae	5.08374	LGJ	4.74994	0.0149901
k__Bacteria.p__Proteobacteria.c__Gammaproteobacteria.o__Burkholderiales.f__Burkholderiaceae.g__Burkholderia_Caballeronia_Paraburkholderia.s__Candidatus_Paraburkholderia	3.31676			0.0400572
k__Bacteria.p__Bacteroidota.c__Bacteroidia.o__Sphingobacteriales.f__CWT_CU03_E12	2.79819			0.0380022
k__Bacteria.p__Dadabacteria.c__Dadabacteriia.o__Dadabacteriales.f__Dadabacteriales	3.32635			0.0142741
k__Bacteria.p__Actinobacteriota.c__Acidimicrobiia.o__IMCC26256.f__IMCC26256.g__IMCC26256.s__bacterium_enrichment	3.60411			0.0146195
k__Bacteria.p__Chloroflexi.c__Chloroflexia.o__Thermomicrobiales	3.80201			-
k__Bacteria.p__Bacteroidota.c__Bacteroidia.o__Sphingobacteriales.f__Sphingobacteriaceae	3.2694			0.0123295
k__Bacteria.p__Acidobacteriota.c__Acidobacteriae.o__PAUC26f.f__PAUC26f	3.17478			-
k__Bacteria.p__Dependentiae.c__Babeliae.o__Babeliales.f__Vermiphilaceae.g__Vermiphilaceae	2.45032			-
k__Bacteria.p__Proteobacteria.c__Gammaproteobacteria	4.87505			-
k__Bacteria.p__Actinobacteriota.c__Actinobacteria.o__Propionibacteriales.f__Propionibacteriaceae	3.04397			-
k__Bacteria.p__Verrucomicrobiota.c__Chlamydiae.o__Chlamydiales.f__Simkaniaceae	4.08622			0.00969272
k__Bacteria.p__Chloroflexi.c__Ktedonobacteria.o__Ktedonobacterales.f__Ktedonobacteraceae.g__Thermosporothrix	3.86917			-
k__Bacteria.p__Actinobacteriota.c__Actinobacteria.o__Frankiales.f__Frankiaceae	3.92952			0.0387482
k__Bacteria.p__Armatimonadota.c__Fimbriimonadia.o__Fimbriimonadales.f__Fimbriimonadaceae	3.02242			-
k__Bacteria.p__MBNT15.c__MBNT15.o__MBNT15	2.78305			-
k__Bacteria.p__Proteobacteria.c__Gammaproteobacteria.o__WD260	2.76222			0.0336748
k__Bacteria.p__Proteobacteria.c__Alphaproteobacteria.o__Micropepsales.f__Micropepsaceae.g__Micropepsaceae	2.79313			0.0245849
k__Bacteria.p__Proteobacteria.c__Gammaproteobacteria.o__Pseudomonadales.f__Pseudomonadaceae	4.15288			0.0104124
k__Bacteria.p__Acidobacteriota.c__Acidobacteriae.o__Bryobacterales.f__Bryobacteraceae.g__Bryobacter	4.8926	LGJ	4.5049	0.0289775
k__Bacteria.p__Planctomycetota.c__OM190.o__OM190.f__OM190.g__OM190	3.11011			-
k__Bacteria.p__FCPU426.c__FCPU426.o__FCPU426.f__FCPU426.g__FCPU426	2.84037			-
k__Bacteria.p__Acidobacteriota.c__Acidobacteriae.o__Acidobacteriales.f__Acidobacteriaceae_Subgroup_1.g__Acidipila	3.99203			0.0283887
k__Bacteria.p__Verrucomicrobiota.c__Verrucomicrobiae	4.65782	LGZ	4.2476	0.0164868
k__Bacteria.p__Proteobacteria.c__Alphaproteobacteria.o__Dongiales.f__Dongiaceae.g__Dongia	3.34217			0.0113303
k__Bacteria.p__Chloroflexi.c__Dehalococcoidia.o__S085.f__S085	2.45022			0.014913
k__Bacteria.p__Acidobacteriota.c__Blastocatellia.o__Pyrinomonadales	3.18909			0.0357763
k__Bacteria.p__Actinobacteriota.c__Acidimicrobiia.o__IMCC26256.f__IMCC26256.g__IMCC26256.s__actinobacterium_BGR	4.15038			0.00927268
k__Bacteria.p__Proteobacteria.c__Alphaproteobacteria.o__Sphingomonadales.f__Sphingomonadaceae	4.20686			0.0355161
k__Bacteria.p__Proteobacteria.c__Alphaproteobacteria.o__Micropepsales.f__Micropepsaceae	4.19424			0.0323864
k__Bacteria.p__Proteobacteria.c__Gammaproteobacteria.o__Steroidobacterales	3.38061			0.0240587
k__Bacteria.p__Cyanobacteria.c__Vampirivibrionia	3.32864			0.0484473
k__Bacteria.p__Proteobacteria.c__Alphaproteobacteria.o__Acetobacterales.f__Acetobacteraceae.g__Acidiphilium	3.4502			-
k__Bacteria.p__Planctomycetota	4.97778			-
k__Bacteria.p__Armatimonadota.c__Chthonomonadetes.o__Chthonomonadales	3.65362			0.0295208
k__Bacteria.p__Proteobacteria.c__Alphaproteobacteria.o__Caulobacterales	4.01482			0.0244998
k__Archaea.p__Crenarchaeota.c__Nitrososphaeria.o__Nitrosotaleales	3.61251			0.00991452
k__Bacteria.p__Bacteroidota.c__Bacteroidia.o__Chitinophagales	4.2758			0.0297961
k__Bacteria.p__Actinobacteriota	5.48754	LGJ	5.01035	0.0206898
k__Bacteria.p__Chloroflexi	5.61288	LCK	5.26359	0.0116876
k__Bacteria.p__Proteobacteria.c__Gammaproteobacteria.o__Legionellales	2.81976			-
k__Bacteria.p__Patescibacteria.c__Saccharimonadia.o__Saccharimonadales.f__Saccharimonadales	3.31453			0.0131624
k__Bacteria.p__Acidobacteriota.c__Acidobacteriae.o__Acidobacteriales.f__Acidobacteriaceae_Subgroup_1.g__Terriglobus	2.97583			0.0201598
k__Bacteria.p__RCP2_54.c__RCP2_54.o__RCP2_54.f__RCP2_54	3.76927			0.0161763
k__Bacteria.p__Planctomycetota.c__Planctomycetes.o__Isosphaerales	4.49611	LGJ	4.09772	0.0158715
k__Bacteria.p__Actinobacteriota.c__Actinobacteria.o__Catenulisporales.f__Catenulisporaceae.g__Catenulispora.s__Catenulispora_sp	2.71397			-
k__Bacteria.p__Actinobacteriota.c__Actinobacteria.o__Frankiales.f__Frankiaceae.g__Jatrophihabitans	3.91298			0.0394654
k__Bacteria.p__Proteobacteria.c__Alphaproteobacteria.o__Rhizobiales.f__Rhodomicrobiaceae.g__Rhodomicrobium	2.88717			-
k__Bacteria.p__Acidobacteriota.c__Acidobacteriae.o__Subgroup_2.f__Subgroup_2.g__Subgroup_2	4.44148	XCK	4.09866	0.0458811

## Sheet: Bacterial microbial function
Table S12. Analysis of soil bacterial microbial functions at the LEGG level 1
PathwayLevel1	LGJ1	LGJ2	LGJ3	LGZ1	LGZ2	LGZ3	LCK1	LCK2	LCK3	XGJ1	XGJ2	XGJ3	XGZ1	XGZ2	XGZ3	XCK1	XCK2	XCK3
Cellular Processes	0.0296121	0.0309838	0.0305825	0.0353357	0.0382212	0.0327011	0.0371345	0.0371948	0.0362529	0.0324234	0.0327584	0.0337457	0.0360677	0.0377132	0.0377804	0.0391995	0.0384637	0.0376986
Environmental Information Processing	0.0929669	0.0920716	0.0925067	0.0927431	0.0921032	0.0944415	0.0862141	0.0820817	0.0818349	0.0961763	0.0959618	0.0950569	0.0917387	0.0854664	0.0916915	0.0946229	0.0825693	0.0833809
Genetic Information Processing	0.133124	0.136159	0.137893	0.129849	0.13599	0.128099	0.15789	0.161897	0.164265	0.130969	0.136477	0.131413	0.134171	0.152953	0.134001	0.142489	0.15044	0.154865
Human Diseases	0.0127954	0.0130382	0.0130195	0.014897	0.0154968	0.0144237	0.0113027	0.00995452	0.00978728	0.0150899	0.0155327	0.0145736	0.0147401	0.0132654	0.015176	0.0144373	0.0116936	0.0113713
Metabolism	0.719152	0.715538	0.713912	0.714889	0.706511	0.717516	0.697191	0.699473	0.698516	0.712899	0.707377	0.712843	0.7112	0.699915	0.709428	0.698572	0.706505	0.702625
Organismal Systems	0.0123497	0.0122094	0.0120864	0.0122864	0.0116779	0.0128188	0.0102677	0.00939865	0.00934399	0.0124423	0.011893	0.0123687	0.0120828	0.0106866	0.0119231	0.0106796	0.0103282	0.0100587
Table S13. Analysis of soil bacterial microbial functions at the LEGG level 2
PathwayLevel2	LGJ1	LGJ2	LGJ3	LGZ1	LGZ2	LGZ3	LCK1	LCK2	LCK3	XGJ1	XGJ2	XGJ3	XGZ1	XGZ2	XGZ3	XCK1	XCK2	XCK3
Amino acid metabolism	0.14484	0.14369	0.14276	0.147482	0.145839	0.147703	0.143944	0.144745	0.144779	0.14263	0.142141	0.143521	0.1472	0.145018	0.147327	0.147653	0.144794	0.145267
Biosynthesis of other secondary metabolites	0.0151962	0.0154022	0.0151617	0.016053	0.015685	0.0163366	0.0157033	0.0164498	0.0162326	0.0144314	0.0142632	0.0146696	0.0157463	0.0156562	0.0156643	0.015239	0.0173024	0.0166609
Cancer: specific types	0.00188141	0.00192679	0.00191858	0.00232506	0.00243181	0.00227147	0.00145895	0.00121982	0.0012444	0.00230114	0.00235662	0.00212094	0.00224755	0.0019654	0.00230866	0.00201117	0.00158112	0.00151407
Carbohydrate metabolism	0.164722	0.164099	0.163288	0.166695	0.163131	0.167461	0.158702	0.160325	0.160833	0.158909	0.156918	0.16028	0.165733	0.160477	0.163408	0.158659	0.164597	0.162632
Cardiovascular disease	0.000406884	0.000432933	0.00043232	0.000661043	0.000725112	0.000602669	0.000348875	0.000288879	0.000294037	0.000604684	0.00062724	0.000542683	0.000637966	0.000549436	0.000689805	0.000553614	0.00040735	0.000396011
Cell growth and death	0.00953978	0.00992731	0.0100568	0.0105025	0.0113386	0.0100349	0.0104795	0.0104236	0.0105686	0.0109162	0.0111817	0.010419	0.0107345	0.0112287	0.0109866	0.0108942	0.0103966	0.0105257
Cancer: overview	0.00121017	0.0012498	0.00125436	0.00144856	0.00153735	0.00142391	0.0010647	0.000890297	0.00091691	0.00152826	0.00159157	0.00143698	0.00142399	0.00131115	0.00147096	0.00133378	0.00108583	0.00104046
Cell motility	0.0131677	0.0142852	0.0137904	0.0179276	0.0202766	0.0156743	0.0208942	0.0212747	0.0203584	0.0146106	0.0148808	0.0165235	0.0186644	0.020549	0.0200788	0.0218811	0.0219619	0.0213693
Cellular community - eukaryotes	2.3307e-06	2.28274e-06	2.99085e-06	6.74896e-06	1.50651e-05	9.64483e-06	1.79221e-06	3.62028e-06	1.93143e-06	6.46458e-06	7.2465e-06	9.03136e-06	1.27037e-05	5.98865e-06	1.39755e-05	7.26144e-05	3.55805e-06	3.22407e-06
Cellular community - prokaryotes	0.00112405	0.00117191	0.00121832	0.0010168	0.0010929	0.000987949	0.00143526	0.00141477	0.00141234	0.00124444	0.00132724	0.00129837	0.00102926	0.00122752	0.00110044	0.00132449	0.00123452	0.00125876
Circulatory system	0.000383167	0.00039705	0.000376459	0.000536993	0.000585491	0.000500797	0.000407803	0.000263258	0.000255589	0.000472728	0.000482239	0.000493264	0.000622276	0.000506786	0.000591647	0.000531312	0.000344602	0.000357481
Development and regeneration	0	0	0	9.49529e-08	1.262e-07	3.05262e-07	0	0	0	6.07842e-07	7.67816e-07	1.47166e-07	0	1.18497e-07	1.99979e-07	9.63235e-07	0	0
Digestive system	0.000257788	0.00028258	0.000245328	0.0003508	0.000279189	0.000438006	0.000234428	0.000240225	0.000219659	0.000241537	0.000303134	0.000227466	0.000262374	0.000248931	0.000303244	0.000257165	0.000285257	0.000266567
Drug resistance: antimicrobial	1.07489e-05	1.1663e-05	1.55745e-05	1.71477e-05	1.4362e-05	1.8298e-05	3.45187e-05	2.28841e-05	1.32683e-05	1.99411e-05	3.59356e-05	3.41509e-05	1.60358e-05	7.78023e-06	2.79128e-05	2.65357e-05	1.21294e-05	1.67217e-05
Endocrine and metabolic disease	0.00173737	0.00174211	0.0017941	0.00156932	0.00160653	0.00156104	0.00184119	0.00186076	0.00190131	0.00172875	0.00177906	0.00174491	0.00164281	0.00173136	0.0016426	0.00165192	0.00174531	0.00180302
Endocrine system	0.00827145	0.00792472	0.00787011	0.00789215	0.00726776	0.00818303	0.00622806	0.00574085	0.00570397	0.00795708	0.00717669	0.00783791	0.00780211	0.00652241	0.00755899	0.00657997	0.00639871	0.00622697
Energy metabolism	0.094298	0.094881	0.0961704	0.0870186	0.0880638	0.0870514	0.0917282	0.0923714	0.0928	0.0973843	0.0987369	0.0959933	0.0875839	0.0913792	0.0875089	0.0890341	0.0910928	0.0911196
Environmental adaptation	0.00200542	0.00208439	0.00207016	0.0021776	0.00226644	0.00216984	0.00222259	0.00212991	0.0021196	0.00213436	0.00224943	0.00219948	0.00218966	0.00225367	0.00225673	0.00219222	0.00226627	0.00220581
Excretory system	0.00074013	0.000770484	0.000804831	0.000600717	0.000611567	0.000616733	0.000630482	0.000635036	0.000644215	0.000766058	0.000785173	0.000793307	0.000578971	0.000615927	0.000606158	0.000571171	0.000633552	0.000596818
Folding, sorting and degradation	0.0251525	0.025799	0.026123	0.0243655	0.0253529	0.0240831	0.0282569	0.028395	0.0286859	0.0253234	0.026413	0.0252993	0.02491	0.0275968	0.0249583	0.0262175	0.0270708	0.0276387
Glycan biosynthesis and metabolism	0.0181139	0.0191484	0.019302	0.019205	0.0206754	0.0186295	0.023253	0.0244991	0.0243772	0.0185299	0.0196961	0.018896	0.0194769	0.0224498	0.0200307	0.0211426	0.0237773	0.0235916
Immune disease	0.000907577	0.000888516	0.00088398	0.000713893	0.000573526	0.000787928	0.000539534	0.000493219	0.000432672	0.000851978	0.000845359	0.000849148	0.000639385	0.000478184	0.000637851	0.000499621	0.000607153	0.000518532
Immune system	0.000628914	0.000649143	0.000649873	0.000606297	0.00060013	0.000681194	0.000533751	0.000379083	0.000391456	0.000809939	0.00086499	0.000790059	0.000567077	0.000529223	0.000581944	0.000537872	0.000390362	0.000384868
Infectious disease: bacterial	0.000418391	0.000422271	0.000429542	0.000429875	0.000505436	0.000461673	0.00055671	0.000453862	0.000471067	0.000479547	0.000548202	0.000535591	0.000431089	0.000453726	0.000489528	0.000922458	0.00037638	0.000403915
Infectious disease: parasitic	0.00109424	0.00113191	0.00107538	0.00152226	0.00152008	0.00136521	0.000918621	0.00098638	0.000893202	0.00123768	0.00119425	0.00113136	0.00138099	0.00122923	0.00144474	0.00139498	0.00135189	0.00123054
Infectious disease: viral	5.77054e-07	7.37856e-07	5.5735e-07	1.9721e-07	1.8299e-06	1.81704e-07	1.05116e-05	8.98863e-06	6.81903e-06	1.21568e-07	3.66718e-07	3.3306e-07	1.09369e-06	2.91229e-05	1.35371e-06	1.53442e-05	6.86462e-06	1.45622e-05
Lipid metabolism	0.0493917	0.048795	0.0476241	0.0523208	0.0507272	0.0527029	0.0454714	0.0451376	0.0442671	0.0478316	0.0459079	0.0479914	0.0510524	0.0463969	0.0509418	0.0485255	0.0488046	0.0470193
Membrane transport	0.0656902	0.0641896	0.0649219	0.063089	0.0615316	0.0649652	0.0549979	0.0520196	0.0523367	0.0675579	0.0667758	0.0653622	0.062367	0.056063	0.0611072	0.061895	0.0522911	0.0534013
Metabolism of cofactors and vitamins	0.0682545	0.0685923	0.0698722	0.0632834	0.0642957	0.063113	0.0686549	0.068449	0.0689557	0.0692467	0.0709213	0.0686392	0.064259	0.0666989	0.0641031	0.0649116	0.0659438	0.0667729
Metabolism of other amino acids	0.0339301	0.0334233	0.0334175	0.0332315	0.0325343	0.0332111	0.0283542	0.0279055	0.0274475	0.0346005	0.0340432	0.0340382	0.0326544	0.0300894	0.0330637	0.0307477	0.0301543	0.0293355
Metabolism of terpenoids and polyketides	0.0255586	0.024825	0.0246037	0.0252166	0.024271	0.0257744	0.0247908	0.0245264	0.0244619	0.0243999	0.0236753	0.0245414	0.0251219	0.024186	0.0250091	0.02388	0.0242659	0.0242299
Nervous system	2.51506e-05	4.0436e-05	2.78832e-05	4.87182e-05	2.69832e-05	9.17604e-05	4.24895e-06	4.11677e-06	3.79849e-06	2.41707e-05	1.25372e-05	1.08826e-05	2.41684e-05	3.81013e-06	1.00067e-05	3.58256e-06	3.76297e-06	8.07487e-06
Neurodegenerative disease	0.00512806	0.00523151	0.00521506	0.00620961	0.00658081	0.00593137	0.00452909	0.00372943	0.0036136	0.00633781	0.00655406	0.00617749	0.00631918	0.00551001	0.00646255	0.00602788	0.00451953	0.0044335
Nucleotide metabolism	0.0581745	0.0590471	0.0597317	0.0559916	0.0576777	0.0554978	0.0647768	0.0655405	0.0661969	0.0574877	0.0593231	0.057627	0.0571728	0.0629474	0.057132	0.0596585	0.061729	0.0632886
Replication and repair	0.0461248	0.0469203	0.0472011	0.0457085	0.0468354	0.0454502	0.0526152	0.0537265	0.0541387	0.0447226	0.0462655	0.0448208	0.0464177	0.0505468	0.0464393	0.0483795	0.0508308	0.0516352
Sensory system	3.77259e-05	6.06425e-05	4.18013e-05	7.30407e-05	4.02105e-05	0.000137099	6.37342e-06	6.17516e-06	5.69773e-06	3.58555e-05	1.8015e-05	1.61728e-05	3.61837e-05	5.71519e-06	1.41447e-05	5.37384e-06	5.64445e-06	1.21123e-05
Signal transduction	0.0272552	0.027874	0.0275738	0.0296426	0.0305635	0.0294642	0.0312141	0.0300619	0.0294976	0.0286077	0.0291613	0.0296845	0.0293551	0.0293904	0.030569	0.0327269	0.0302774	0.0299794
Signaling molecules and interaction	2.14634e-05	7.99344e-06	1.10214e-05	1.14893e-05	8.12413e-06	1.20797e-05	2.09427e-06	1.44811e-07	5.5797e-07	1.06408e-05	2.46733e-05	1.02009e-05	1.66272e-05	1.30286e-05	1.53292e-05	1.08153e-06	7.82399e-07	1.37194e-07
Transcription	0.0103504	0.0106133	0.0107512	0.0102536	0.0106163	0.0100657	0.0113564	0.0117002	0.0119443	0.0100148	0.0102354	0.0101377	0.0106631	0.0113593	0.0105593	0.010948	0.0112891	0.0114917
Translation	0.0514961	0.0528264	0.0538173	0.0495216	0.053185	0.0484995	0.0656616	0.0680752	0.0694965	0.0509084	0.0535632	0.0511548	0.0521801	0.06345	0.0520443	0.0569438	0.0612499	0.0640998
Transport and catabolism	0.00577826	0.00559709	0.00551405	0.00588209	0.00549809	0.00599422	0.00432382	0.00407809	0.00391158	0.00564565	0.00536143	0.00549579	0.00562682	0.00470206	0.00560053	0.00502709	0.00486711	0.00454159
Xenobiotics biodegradation and metabolism	0.0466724	0.0436349	0.0419812	0.0483918	0.0436118	0.0500354	0.0318122	0.0295242	0.0281648	0.0474483	0.0417511	0.0466453	0.0451992	0.0346168	0.0452394	0.0391209	0.0340435	0.0327082

## Sheet: Fungal microbial functions
Table S14. These ASVs belong to nine trophic modes
Trophic Mode	LGJ1	LGJ2	LGJ3	LGZ1	LGZ2	LGZ3	LCK1	LCK2	LCK3	XGJ1	XGJ2	XGJ3	XGZ1	XGZ2	XGZ3	XCK1	XCK2	XCK3
Pathogen-Saprotroph-Symbiotroph	799	131	88	1479	885	824	22	39	4	104	164	26	3443	207	234	124	31	2
Pathotroph	1112	1781	546	7341	2170	3319	4156	199	171	726	2172	873	1966	2153	3401	3850	136	377
Pathotroph-Saprotroph	346	1023	450	689	374	167	99	113	115	511	478	508	540	957	2263	268	117	581
Pathotroph-Saprotroph-Symbiotroph	1692	1516	1305	5163	8927	4358	18003	1679	294	1918	13334	3407	3161	2726	5385	6826	5949	3730
Pathotroph-Symbiotroph	8606	2839	3785	815	440	539	35	70	115	5467	2998	5226	1014	104	1442	569	14	124
Saprotroph	12834	7965	5989	23891	12615	25137	2329	4473	3517	11211	17314	10538	25076	13363	16702	13117	5018	7960
Saprotroph-Pathotroph-Symbiotroph	0	0	0	0	0	0	1	0	0	21	0	0	0	5	0	0	0	0
Saprotroph-Symbiotroph	0	29	12	5	224	192	176	195	83	9	53	3	142	65	50	2	25	0
Symbiotroph	52	96	58	415	320	163	209	334	20	135	368	109	939	605	742	38	131	50
Table S15. A total of 73 KEGG metabolic pathways
Guild	LGJ1	LGJ2	LGJ3	LGZ1	LGZ2	LGZ3	LCK1	LCK2	LCK3	XGJ1	XGJ2	XGJ3	XGZ1	XGZ2	XGZ3	XCK1	XCK2	XCK3
Algal Parasite--Leaf Saprotroph-Wood Saprotroph	0	0	0	0	0	0	0	0	0	0	0	0	0	0	0	0	0	38
Animal Endosymbiont-Animal Pathogen-Endophyte-Plant Pathogen-Undefined Saprotroph	0	0	0	0	0	0	0	0	0	0	13	2	0	5	13	0	0	0
Animal Parasite-Fungal Parasite	0	0	0	0	0	0	0	0	0	0	0	0	8	0	5	0	0	0
Animal Pathogen	751	1120	169	2210	311	601	3	13	16	21	131	100	173	13	54	12	7	47
Animal Pathogen-Clavicipitaceous Endophyte-Fungal Parasite	33	43	26	77	192	24	9	3	14	0	1	0	0	0	0	1	0	0
Animal Pathogen-Dung Saprotroph-Endophyte-Epiphyte-Plant Saprotroph-Wood Saprotroph	237	511	758	3436	7913	3713	17770	1159	81	535	138	1749	969	855	3225	4139	5787	2145
Animal Pathogen-Dung Saprotroph-Endophyte-Lichen Parasite-Plant Pathogen-Undefined Saprotroph	6	4	2	4	3	4	0	0	0	0	17	15	34	56	35	0	0	8
Animal Pathogen-Endophyte-Epiphyte-Plant Pathogen-Undefined Saprotroph	6	0	3	77	44	14	8	16	18	28	58	118	9	32	56	203	20	264
Animal Pathogen-Endophyte-Ericoid Mycorrhizal-Plant Pathogen-Wood Saprotroph	0	0	0	0	0	2	0	0	0	0	0	0	0	0	0	0	0	0
Animal Pathogen-Endophyte-Fungal Parasite-Plant Pathogen-Wood Saprotroph	799	131	88	1479	885	824	22	39	4	104	164	26	3443	207	234	124	31	2
Animal Pathogen-Endophyte-Lichen Parasite-Plant Pathogen-Soil Saprotroph-Wood Saprotroph	1278	959	512	1401	689	525	112	124	140	935	244	1268	1483	1358	1193	1137	71	658
Animal Pathogen-Endophyte-Lichen Parasite-Plant Pathogen-Wood Saprotroph	11	2	4	25	63	10	61	278	42	74	158	103	13	59	75	949	12	150
Animal Pathogen-Endophyte-Plant Pathogen-Undefined Saprotroph	0	0	0	0	0	0	0	0	0	0	0	0	0	0	1	0	0	8
Animal Pathogen-Endophyte-Plant Pathogen-Wood Saprotroph	24	0	0	25	36	17	13	83	4	184	687	75	32	92	413	383	38	484
Animal Pathogen-Fungal Parasite-Undefined Saprotroph	1	1	0	0	0	0	0	0	0	0	3	16	0	0	19	0	0	0
Animal Pathogen-Plant Pathogen-Soil Saprotroph-Undefined Saprotroph	285	312	397	345	261	150	26	34	1	165	42	263	122	872	1888	16	0	1
Animal Pathogen-Plant Pathogen-Undefined Saprotroph	2	0	0	5	2	0	5	8	18	17	252	77	33	27	150	11	0	8
Animal Pathogen-Plant Pathogen-Wood Saprotroph	0	0	0	0	0	0	0	0	1	0	0	10	63	0	73	0	0	0
Animal Pathogen-Soil Saprotroph	0	0	0	0	0	29	0	0	0	0	0	0	0	0	0	0	0	0
Animal Pathogen-Undefined Saprotroph	47	0	2	45	61	12	60	67	95	31	1	26	61	44	23	91	97	350
Arbuscular Mycorrhizal	17	13	53	405	198	159	191	302	4	122	126	63	62	127	529	0	131	50
Bryophyte Parasite-Litter Saprotroph-Wood Saprotroph	0	0	0	0	0	0	0	0	0	0	0	0	0	0	3	0	0	0
Clavicipitaceous Endophyte-Plant Pathogen	2	6	5	3	15	2	0	6	28	0	0	4	0	0	10	149	0	2
Dung Saprotroph	14	0	0	5	0	0	0	4	10	0	18	28	35	0	224	212	432	3485
Dung Saprotroph-Ectomycorrhizal-Litter Saprotroph-Undefined Saprotroph	0	0	0	0	0	0	0	4	0	0	0	0	0	0	0	0	0	0
Dung Saprotroph-Endophyte-Plant Pathogen-Undefined Saprotroph	0	10	6	6	0	0	2	0	0	0	0	3	31	0	31	0	0	0
Dung Saprotroph-Endophyte-Wood Saprotroph	0	0	0	1	0	72	0	0	0	0	0	0	47	0	0	0	0	0
Dung Saprotroph-Plant Saprotroph	0	13	0	0	7	12	0	0	0	3	0	3	58	0	45	0	0	0
Dung Saprotroph-Plant Saprotroph-Wood Saprotroph	1	0	2	0	2	0	0	0	7	0	2	1	0	7	0	145	0	0
Dung Saprotroph-Soil Saprotroph	7	0	0	9	6	0	0	0	0	10	0	6	13	1	7	0	0	0
Dung Saprotroph-Soil Saprotroph-Undefined Saprotroph	0	0	0	0	0	0	0	0	0	0	0	62	0	0	10	0	0	0
Dung Saprotroph-Undefined Saprotroph	4	0	0	68	20	526	20	0	2	27	8	41	168	80	103	155	145	0
Ectomycorrhizal	35	83	5	2	103	0	15	26	16	13	237	44	877	460	73	22	0	0
Ectomycorrhizal-Fungal Parasite	0	0	0	0	0	0	0	0	3	2615	2795	23	38	21	0	0	0	4
Ectomycorrhizal-Fungal Parasite-Soil Saprotroph-Undefined Saprotroph	0	2	0	25	23	9	0	1	0	2	0	0	15	0	4	0	0	0
Ectomycorrhizal-Lichenized-Wood Saprotroph	0	0	0	0	0	0	0	0	5	0	0	0	0	0	0	0	0	0
Ectomycorrhizal-Undefined Saprotroph	0	0	0	0	2	0	161	178	64	0	0	2	0	1	0	0	1	0
Endomycorrhizal-Plant Pathogen-Undefined Saprotroph	51	0	2	5	5	9	16	1	1	97	10536	0	10	142	0	0	17	0
Endophyte	0	0	0	3	19	4	3	6	0	0	5	2	0	18	140	16	0	0
Endophyte-Lichen Parasite-Plant Pathogen-Undefined Saprotroph	0	0	0	3	21	0	3	3	0	3	3	12	0	4	64	0	0	0
Endophyte-Lichen Parasite-Undefined Saprotroph	0	0	0	11	0	0	0	0	0	0	0	0	0	0	0	0	0	0
Endophyte-Litter Saprotroph-Soil Saprotroph-Undefined Saprotroph	0	29	12	4	222	120	15	9	14	9	51	0	95	50	34	2	24	0
Endophyte-Litter Saprotroph-Wood Saprotroph	0	0	0	0	0	0	0	0	0	0	0	1	0	5	9	0	0	0
Endophyte-Plant Pathogen	1143	536	26	249	2	3	14	27	37	603	31	206	173	0	97	12	1	10
Endophyte-Plant Pathogen-Undefined Saprotroph	29	14	0	5	11	2	0	2	0	12	1384	15	13	15	33	0	0	9
Endophyte-Plant Pathogen-Wood Saprotroph	0	0	0	0	6	0	10	2	0	0	4	9	0	0	44	0	0	26
Endophyte-Soil Saprotroph	0	0	0	0	0	0	0	0	0	0	2	0	0	9	7	0	0	0
Endophyte-Undefined Saprotroph	0	0	0	0	0	0	0	4	0	0	0	0	0	0	0	0	0	0
Epiphyte	0	0	0	5	0	0	0	0	0	0	0	0	0	0	0	0	0	0
Epiphyte-Plant Pathogen	7428	2254	3728	486	228	510	12	34	33	2249	171	4988	788	76	1326	370	13	108
Epiphyte-Plant Pathogen-Wood Saprotroph	1	0	0	0	0	0	0	0	0	6	0	0	0	0	0	0	0	0
Ericoid Mycorrhizal	0	0	0	0	3	0	0	0	0	0	0	5	15	7	9	37	0	0
Fungal Parasite	217	615	265	519	996	2355	9	32	50	156	219	123	1529	85	998	336	25	0
Fungal Parasite-Plant Pathogen	0	6	0	5	0	0	0	0	0	6	0	14	0	0	0	0	0	0
Fungal Parasite-Plant Pathogen-Plant Saprotroph	8	0	18	265	0	0	0	0	0	293	108	26	245	5	4	10	9	43
Fungal Parasite-Plant Saprotroph-Soil Saprotroph	3	3	0	19	24	0	0	1	0	0	0	1	1	0	43	0	0	0
Fungal Parasite-Undefined Saprotroph	49	14	18	140	119	24	14	10	8	42	105	40	552	113	211	15	4	4
Fungal Parasite-Wood Saprotroph	0	0	0	0	10	0	0	0	0	5	0	0	13	0	0	0	0	0
Leaf Saprotroph	0	0	67	1	0	0	0	0	0	0	0	0	0	0	0	0	0	0
Leaf Saprotroph-Plant Pathogen-Undefined Saprotroph-Wood Saprotroph	0	707	33	0	0	0	0	0	0	0	0	0	0	0	0	0	3	0
Lichen Parasite	0	0	0	0	0	0	0	0	0	0	3	3	0	0	0	0	0	0
Litter Saprotroph-Soil Saprotroph-Wood Saprotroph	0	0	0	0	0	0	0	0	0	0	0	0	25	7	0	0	0	0
Orchid Mycorrhizal-Plant Pathogen-Wood Saprotroph	0	0	0	0	0	0	1	0	0	21	0	0	0	5	0	0	0	0
Plant Pathogen	144	40	112	4599	863	363	4144	154	105	540	1819	633	229	2055	2344	3502	104	330
Plant Pathogen-Undefined Parasite-Undefined Saprotroph	0	0	0	8	0	0	0	0	0	3	0	0	27	0	0	0	0	0
Plant Pathogen-Undefined Saprotroph	0	0	0	10	10	5	2	0	0	0	59	87	2	0	47	16	1	22
Plant Pathogen-Wood Saprotroph	0	0	0	0	0	0	0	3	0	0	0	0	0	4	0	124	7	93
Plant Saprotroph	0	0	0	4	2	7	0	0	3	0	0	2	2	0	33	74	0	0
Plant Saprotroph-Wood Saprotroph	0	5	2	11	3	51	2	2	0	21	0	2	134	0	0	0	0	0
Soil Saprotroph	1	1	27	0	5	0	0	0	7	2	0	0	60	4	0	76	0	26
Undefined Saprotroph	12780	7939	5880	23772	12476	23190	2287	4459	3449	11075	17278	6171	24407	13095	13903	11502	4410	4183
Undefined Saprotroph-Wood Saprotroph	0	0	0	0	80	4	0	0	3	68	4	0	155	119	111	4	0	0
Wood Saprotroph	27	7	11	21	14	1347	20	8	36	5	4	4222	19	50	2266	949	31	266
